# Supplementary material for: Systematic Elucidation of the Potential Mechanism of Erzhi Pill against Drug‐Induced Liver Injury via Network Pharmacology Approach
Source: Hindawi journal article supplement (doi:10.1155/2020/6219432), 2020-01-01
Supplement: f1 [file 6219432.f1.zip]

**Title: Uncovering the pharmacological mechanism of Erzhi pill on drug-induced liver injury based on network pharmacology**

**Table S3 Common targets related to bioactive compounds**

| Chemname                                  | Entry  | Gene names |
|-------------------------------------------|--------|------------|
| (20S)-24-ene-3 $\beta$ ,20-diol-3-acetate | P08581 | MET        |
| (20S)-24-ene-3 $\beta$ ,20-diol-3-acetate | Q13133 | NR1H3      |
| (20S)-24-ene-3 $\beta$ ,20-diol-3-acetate | Q04828 | AKR1C1     |
| (20S)-24-ene-3 $\beta$ ,20-diol-3-acetate | P28482 | MAPK1      |
| (20S)-24-ene-3 $\beta$ ,20-diol-3-acetate | P02766 | TTR        |
| (20S)-24-ene-3 $\beta$ ,20-diol-3-acetate | P02768 | ALB        |
| (20S)-24-ene-3 $\beta$ ,20-diol-3-acetate | P45983 | MAPK8      |
| (20S)-24-ene-3 $\beta$ ,20-diol-3-acetate | P00734 | F2         |
| (20S)-24-ene-3 $\beta$ ,20-diol-3-acetate | P35968 | KDR        |
| (20S)-24-ene-3 $\beta$ ,20-diol-3-acetate | P06276 | BCHE       |
| (20S)-24-ene-3 $\beta$ ,20-diol-3-acetate | P23141 | CES1       |
| (20S)-24-ene-3 $\beta$ ,20-diol-3-acetate | P03372 | ESR1       |
| (20S)-24-ene-3 $\beta$ ,20-diol-3-acetate | Q06520 | SULT2A1    |
| (20S)-24-ene-3 $\beta$ ,20-diol-3-acetate | P24941 | CDK2       |
| (20S)-24-ene-3 $\beta$ ,20-diol-3-acetate | P09211 | GSTP1      |
| (20S)-24-ene-3 $\beta$ ,20-diol-3-acetate | P35398 | RORA       |
| (20S)-24-ene-3 $\beta$ ,20-diol-3-acetate | P37231 | PPARG      |
| (20S)-24-ene-3 $\beta$ ,20-diol-3-acetate | P08758 | ANXA5      |
| (20S)-24-ene-3 $\beta$ ,20-diol-3-acetate | Q96R11 | NR1H4      |
| (20S)-24-ene-3 $\beta$ ,20-diol-3-acetate | P29474 | NOS3       |
| (20S)-24-ene-3 $\beta$ ,20-diol-3-acetate | P18031 | PTPN1      |
| (20S)-24-ene-3 $\beta$ ,20-diol-3-acetate | P00742 | F10        |
| (20S)-24-ene-3 $\beta$ ,20-diol-3-acetate | P12643 | BMP2       |
| (20S)-24-ene-3 $\beta$ ,20-diol-3-acetate | P12931 | SRC        |
| (20S)-24-ene-3 $\beta$ ,20-diol-3-acetate | P00533 | EGFR       |
| (20S)-24-ene-3 $\beta$ ,20-diol-3-acetate | P15056 | BRAF       |
| (20S)-24-ene-3 $\beta$ ,20-diol-3-acetate | P42574 | CASP3      |
| (20S)-24-ene-3 $\beta$ ,20-diol-3-acetate | P11142 | HSPA8      |
| (20S)-24-ene-3 $\beta$ ,20-diol-3-acetate | P00390 | GSR        |
| (20S)-24-ene-3 $\beta$ ,20-diol-3-acetate | P00374 | DHFR       |
| (20S)-24-ene-3 $\beta$ ,20-diol-3-acetate | P04818 | TYMS       |
| (20S)-24-ene-3 $\beta$ ,20-diol-3-acetate | Q16539 | MAPK14     |
| (20S)-24-ene-3 $\beta$ ,20-diol-3-acetate | P11362 | FGFR1      |
| (20S)-24-ene-3 $\beta$ ,20-diol-3-acetate | Q06124 | PTPN11     |
| (20S)-24-ene-3 $\beta$ ,20-diol-3-acetate | P21802 | FGFR2      |
| (20S)-24-ene-3 $\beta$ ,20-diol-3-acetate | P09874 | PARP1      |
| (20S)-24-ene-3 $\beta$ ,20-diol-3-acetate | O15530 | PDPK1      |
| (20S)-24-ene-3 $\beta$ ,20-diol-3-acetate | Q00987 | MDM2       |
| (20S)-24-ene-3 $\beta$ ,20-diol-3-acetate | P15559 | NQO1       |
| 3'-O-Methylorobol                         | O15530 | PDPK1      |
| 3'-O-Methylorobol                         | P00374 | DHFR       |
| 3'-O-Methylorobol                         | P00390 | GSR        |
| 3'-O-Methylorobol                         | P00533 | EGFR       |
| 3'-O-Methylorobol                         | P00734 | F2         |
| 3'-O-Methylorobol                         | P00742 | F10        |
| 3'-O-Methylorobol                         | P02768 | ALB        |
| 3'-O-Methylorobol                         | P03372 | ESR1       |
| 3'-O-Methylorobol                         | P03950 | ANG        |
| 3'-O-Methylorobol                         | P04818 | TYMS       |
| 3'-O-Methylorobol                         | P06276 | BCHE       |
| 3'-O-Methylorobol                         | P06737 | PYGL       |
| 3'-O-Methylorobol                         | P07900 | HSP90AA1   |

|                   |        |          |
|-------------------|--------|----------|
| 3'-O-Methylorobol | P11142 | HSPA8    |
| 3'-O-Methylorobol | P11362 | FGFR1    |
| 3'-O-Methylorobol | P14174 | MIF      |
| 3'-O-Methylorobol | P23141 | CES1     |
| 3'-O-Methylorobol | P24941 | CDK2     |
| 3'-O-Methylorobol | P29474 | NOS3     |
| 3'-O-Methylorobol | P31749 | AKT1     |
| 3'-O-Methylorobol | P35968 | KDR      |
| 3'-O-Methylorobol | P45983 | MAPK8    |
| 3'-O-Methylorobol | Q06520 | SULT2A1  |
| 3'-O-Methylorobol | Q16539 | MAPK14   |
| Acacetin          | O15530 | PDPK1    |
| Acacetin          | P00374 | DHFR     |
| Acacetin          | P00390 | GSR      |
| Acacetin          | P00734 | F2       |
| Acacetin          | P02766 | TTR      |
| Acacetin          | P02768 | ALB      |
| Acacetin          | P03372 | ESR1     |
| Acacetin          | P03950 | ANG      |
| Acacetin          | P06276 | BCHE     |
| Acacetin          | P06737 | PYGL     |
| Acacetin          | P07900 | HSP90AA1 |
| Acacetin          | P11142 | HSPA8    |
| Acacetin          | P14174 | MIF      |
| Acacetin          | P15056 | BRAF     |
| Acacetin          | P15559 | NQO1     |
| Acacetin          | P23141 | CES1     |
| Acacetin          | P24941 | CDK2     |
| Acacetin          | P29474 | NOS3     |
| Acacetin          | P35968 | KDR      |
| Acacetin          | P45983 | MAPK8    |
| Acacetin          | Q06520 | SULT2A1  |
| Acacetin          | Q16539 | MAPK14   |
| Acacetin          | Q16678 | CYP1B1   |
| beta-sitosterol   | O15530 | PDPK1    |
| beta-sitosterol   | P00533 | EGFR     |
| beta-sitosterol   | P00734 | F2       |
| beta-sitosterol   | P00742 | F10      |
| beta-sitosterol   | P02753 | RBP4     |
| beta-sitosterol   | P02766 | TTR      |
| beta-sitosterol   | P02768 | ALB      |
| beta-sitosterol   | P03372 | ESR1     |
| beta-sitosterol   | P04035 | HMGCR    |
| beta-sitosterol   | P04818 | TYMS     |
| beta-sitosterol   | P06276 | BCHE     |
| beta-sitosterol   | P08758 | ANXA5    |
| beta-sitosterol   | P12643 | BMP2     |
| beta-sitosterol   | P12931 | SRC      |
| beta-sitosterol   | P15056 | BRAF     |
| beta-sitosterol   | P15559 | NQO1     |
| beta-sitosterol   | P23141 | CES1     |
| beta-sitosterol   | P24941 | CDK2     |
| beta-sitosterol   | P28482 | MAPK1    |
| beta-sitosterol   | P29474 | NOS3     |
| beta-sitosterol   | P35398 | RORA     |
| beta-sitosterol   | P35968 | KDR      |
| beta-sitosterol   | P37231 | PPARG    |
| beta-sitosterol   | P45983 | MAPK8    |

|                       |        |          |
|-----------------------|--------|----------|
| beta-sitosterol       | P49638 | TTPA     |
| beta-sitosterol       | P55055 | NR1H2    |
| beta-sitosterol       | Q04828 | AKR1C1   |
| beta-sitosterol       | Q06124 | PTPN11   |
| beta-sitosterol       | Q06520 | SULT2A1  |
| beta-sitosterol       | Q13133 | NR1H3    |
| beta-sitosterol       | Q16539 | MAPK14   |
| beta-sitosterol       | Q96RI1 | NR1H4    |
| Butin                 | O15530 | PDPK1    |
| Butin                 | P00374 | DHFR     |
| Butin                 | P00390 | GSR      |
| Butin                 | P00734 | F2       |
| Butin                 | P02766 | TTR      |
| Butin                 | P02768 | ALB      |
| Butin                 | P03372 | ESR1     |
| Butin                 | P03950 | ANG      |
| Butin                 | P06276 | BCHE     |
| Butin                 | P06737 | PYGL     |
| Butin                 | P07900 | HSP90AA1 |
| Butin                 | P11142 | HSPA8    |
| Butin                 | P14174 | MIF      |
| Butin                 | P15056 | BRAF     |
| Butin                 | P15559 | NQO1     |
| Butin                 | P23141 | CES1     |
| Butin                 | P24941 | CDK2     |
| Butin                 | P29474 | NOS3     |
| Butin                 | P35968 | KDR      |
| Butin                 | P45983 | MAPK8    |
| Butin                 | Q06520 | SULT2A1  |
| Butin                 | Q16539 | MAPK14   |
| Butin                 | Q16678 | CYP1B1   |
| Demethylwedelolactone | O15530 | PDPK1    |
| Demethylwedelolactone | P00374 | DHFR     |
| Demethylwedelolactone | P00390 | GSR      |
| Demethylwedelolactone | P00533 | EGFR     |
| Demethylwedelolactone | P00734 | F2       |
| Demethylwedelolactone | P02766 | TTR      |
| Demethylwedelolactone | P02768 | ALB      |
| Demethylwedelolactone | P03372 | ESR1     |
| Demethylwedelolactone | P03950 | ANG      |
| Demethylwedelolactone | P04179 | SOD2     |
| Demethylwedelolactone | P04818 | TYMS     |
| Demethylwedelolactone | P06276 | BCHE     |
| Demethylwedelolactone | P07900 | HSP90AA1 |
| Demethylwedelolactone | P11142 | HSPA8    |
| Demethylwedelolactone | P11362 | FGFR1    |
| Demethylwedelolactone | P12643 | BMP2     |
| Demethylwedelolactone | P12931 | SRC      |
| Demethylwedelolactone | P14174 | MIF      |
| Demethylwedelolactone | P23141 | CES1     |
| Demethylwedelolactone | P24941 | CDK2     |
| Demethylwedelolactone | P29474 | NOS3     |
| Demethylwedelolactone | P35968 | KDR      |
| Demethylwedelolactone | P45983 | MAPK8    |
| Demethylwedelolactone | P48736 | PIK3CG   |
| Demethylwedelolactone | Q06520 | SULT2A1  |
| Demethylwedelolactone | Q16539 | MAPK14   |
| Eriodictyol           | O15530 | PDPK1    |

|             |        |          |
|-------------|--------|----------|
| Eriodictyol | P00374 | DHFR     |
| Eriodictyol | P00390 | GSR      |
| Eriodictyol | P00533 | EGFR     |
| Eriodictyol | P00734 | F2       |
| Eriodictyol | P00742 | F10      |
| Eriodictyol | P02766 | TTR      |
| Eriodictyol | P02768 | ALB      |
| Eriodictyol | P03372 | ESR1     |
| Eriodictyol | P03950 | ANG      |
| Eriodictyol | P04818 | TYMS     |
| Eriodictyol | P06276 | BCHE     |
| Eriodictyol | P06737 | PYGL     |
| Eriodictyol | P07900 | HSP90AA1 |
| Eriodictyol | P08758 | ANXA5    |
| Eriodictyol | P09211 | GSTP1    |
| Eriodictyol | P11142 | HSPA8    |
| Eriodictyol | P11362 | FGFR1    |
| Eriodictyol | P12931 | SRC      |
| Eriodictyol | P14174 | MIF      |
| Eriodictyol | P15559 | NQO1     |
| Eriodictyol | P23141 | CES1     |
| Eriodictyol | P24941 | CDK2     |
| Eriodictyol | P29474 | NOS3     |
| Eriodictyol | P31749 | AKT1     |
| Eriodictyol | P35968 | KDR      |
| Eriodictyol | P45983 | MAPK8    |
| Eriodictyol | P48736 | PIK3CG   |
| Eriodictyol | Q06520 | SULT2A1  |
| Eriodictyol | Q16539 | MAPK14   |
| Eriodictyol | Q16678 | CYP1B1   |
| Kaempferol  | O15530 | PDPK1    |
| Kaempferol  | P00374 | DHFR     |
| Kaempferol  | P00390 | GSR      |
| Kaempferol  | P00533 | EGFR     |
| Kaempferol  | P00734 | F2       |
| Kaempferol  | P02766 | TTR      |
| Kaempferol  | P03372 | ESR1     |
| Kaempferol  | P03950 | ANG      |
| Kaempferol  | P06276 | BCHE     |
| Kaempferol  | P06737 | PYGL     |
| Kaempferol  | P07900 | HSP90AA1 |
| Kaempferol  | P08183 | ABCB1    |
| Kaempferol  | P08253 | MMP2     |
| Kaempferol  | P09917 | ALOX5    |
| Kaempferol  | P11142 | HSPA8    |
| Kaempferol  | P12931 | SRC      |
| Kaempferol  | P14780 | MMP9     |
| Kaempferol  | P15559 | NQO1     |
| Kaempferol  | P21397 | MAOA     |
| Kaempferol  | P22303 | ACHE     |
| Kaempferol  | P24941 | CDK2     |
| Kaempferol  | P33527 | ABCC1    |
| Kaempferol  | P36888 | FLT3     |
| Kaempferol  | P45983 | MAPK8    |
| Kaempferol  | P47989 | XDH      |
| Kaempferol  | P55055 | NR1H2    |
| Kaempferol  | Q04760 | GLO1     |
| Kaempferol  | Q16678 | CYP1B1   |

|                |        |          |
|----------------|--------|----------|
| Kaempferol     | Q9UNQ0 | ABCG2    |
| Linarin        | O15530 | PDPK1    |
| Linarin        | P00374 | DHFR     |
| Linarin        | P00390 | GSR      |
| Linarin        | P00533 | EGFR     |
| Linarin        | P00734 | F2       |
| Linarin        | P00742 | F10      |
| Linarin        | P00749 | PLAU     |
| Linarin        | P00797 | REN      |
| Linarin        | P01009 | SERPINA1 |
| Linarin        | P02766 | TTR      |
| Linarin        | P02768 | ALB      |
| Linarin        | P03372 | ESR1     |
| Linarin        | P03950 | ANG      |
| Linarin        | P04179 | SOD2     |
| Linarin        | P04818 | TYMS     |
| Linarin        | P06276 | BCHE     |
| Linarin        | P06737 | PYGL     |
| Linarin        | P07900 | HSP90AA1 |
| Linarin        | P08246 | ELANE    |
| Linarin        | P08581 | MET      |
| Linarin        | P08758 | ANXA5    |
| Linarin        | P09211 | GSTP1    |
| Linarin        | P11142 | HSPA8    |
| Linarin        | P11362 | FGFR1    |
| Linarin        | P12931 | SRC      |
| Linarin        | P14174 | MIF      |
| Linarin        | P15056 | BRAF     |
| Linarin        | P15153 | RAC2     |
| Linarin        | P15559 | NQO1     |
| Linarin        | P18031 | PTPN1    |
| Linarin        | P23141 | CES1     |
| Linarin        | P24941 | CDK2     |
| Linarin        | P28482 | MAPK1    |
| Linarin        | P29474 | NOS3     |
| Linarin        | P30043 | BLVRB    |
| Linarin        | P31749 | AKT1     |
| Linarin        | P35228 | NOS2     |
| Linarin        | P35968 | KDR      |
| Linarin        | P37231 | PPARG    |
| Linarin        | P42574 | CASP3    |
| Linarin        | P45983 | MAPK8    |
| Linarin        | P55055 | NR1H2    |
| Linarin        | Q04760 | GLO1     |
| Linarin        | Q04828 | AKR1C1   |
| Linarin        | Q06520 | SULT2A1  |
| Linarin        | Q07912 | TNK2     |
| Linarin        | Q16539 | MAPK14   |
| Lucidumoside D | O15530 | PDPK1    |
| Lucidumoside D | P00374 | DHFR     |
| Lucidumoside D | P00390 | GSR      |
| Lucidumoside D | P00533 | EGFR     |
| Lucidumoside D | P00734 | F2       |
| Lucidumoside D | P00742 | F10      |
| Lucidumoside D | P00797 | REN      |
| Lucidumoside D | P01009 | SERPINA1 |
| Lucidumoside D | P02766 | TTR      |
| Lucidumoside D | P02768 | ALB      |

|                   |        |          |
|-------------------|--------|----------|
| Lucidumoside D    | P03372 | ESR1     |
| Lucidumoside D    | P03950 | ANG      |
| Lucidumoside D    | P04035 | HMGCR    |
| Lucidumoside D    | P04818 | TYMS     |
| Lucidumoside D    | P05019 | IGF1     |
| Lucidumoside D    | P06276 | BCHE     |
| Lucidumoside D    | P06737 | PYGL     |
| Lucidumoside D    | P07900 | HSP90AA1 |
| Lucidumoside D    | P08581 | MET      |
| Lucidumoside D    | P08758 | ANXA5    |
| Lucidumoside D    | P09211 | GSTP1    |
| Lucidumoside D    | P09874 | PARP1    |
| Lucidumoside D    | P11142 | HSPA8    |
| Lucidumoside D    | P11362 | FGFR1    |
| Lucidumoside D    | P11712 | CYP2C9   |
| Lucidumoside D    | P12931 | SRC      |
| Lucidumoside D    | P14174 | MIF      |
| Lucidumoside D    | P15056 | BRAF     |
| Lucidumoside D    | P15153 | RAC2     |
| Lucidumoside D    | P15559 | NQO1     |
| Lucidumoside D    | P18031 | PTPN1    |
| Lucidumoside D    | P23141 | CES1     |
| Lucidumoside D    | P24941 | CDK2     |
| Lucidumoside D    | P28482 | MAPK1    |
| Lucidumoside D    | P29474 | NOS3     |
| Lucidumoside D    | P31749 | AKT1     |
| Lucidumoside D    | P35398 | RORA     |
| Lucidumoside D    | P35968 | KDR      |
| Lucidumoside D    | P37231 | PPARG    |
| Lucidumoside D    | P39900 | MMP12    |
| Lucidumoside D    | P45983 | MAPK8    |
| Lucidumoside D    | P48736 | PIK3CG   |
| Lucidumoside D    | P55055 | NR1H2    |
| Lucidumoside D    | Q06520 | SULT2A1  |
| Lucidumoside D    | Q07912 | TNK2     |
| Lucidumoside D    | Q16539 | MAPK14   |
| Lucidumoside D_qt | O15530 | PDPK1    |
| Lucidumoside D_qt | P00374 | DHFR     |
| Lucidumoside D_qt | P00390 | GSR      |
| Lucidumoside D_qt | P00533 | EGFR     |
| Lucidumoside D_qt | P00734 | F2       |
| Lucidumoside D_qt | P00742 | F10      |
| Lucidumoside D_qt | P02766 | TTR      |
| Lucidumoside D_qt | P02768 | ALB      |
| Lucidumoside D_qt | P03372 | ESR1     |
| Lucidumoside D_qt | P03950 | ANG      |
| Lucidumoside D_qt | P04818 | TYMS     |
| Lucidumoside D_qt | P06276 | BCHE     |
| Lucidumoside D_qt | P06737 | PYGL     |
| Lucidumoside D_qt | P07900 | HSP90AA1 |
| Lucidumoside D_qt | P08758 | ANXA5    |
| Lucidumoside D_qt | P09211 | GSTP1    |
| Lucidumoside D_qt | P09874 | PARP1    |
| Lucidumoside D_qt | P11142 | HSPA8    |
| Lucidumoside D_qt | P11712 | CYP2C9   |
| Lucidumoside D_qt | P12931 | SRC      |
| Lucidumoside D_qt | P14174 | MIF      |
| Lucidumoside D_qt | P15056 | BRAF     |

|                   |        |          |
|-------------------|--------|----------|
| Lucidumoside D_qt | P18031 | PTPN1    |
| Lucidumoside D_qt | P23141 | CES1     |
| Lucidumoside D_qt | P24941 | CDK2     |
| Lucidumoside D_qt | P28482 | MAPK1    |
| Lucidumoside D_qt | P29474 | NOS3     |
| Lucidumoside D_qt | P31749 | AKT1     |
| Lucidumoside D_qt | P35398 | RORA     |
| Lucidumoside D_qt | P35968 | KDR      |
| Lucidumoside D_qt | P37231 | PPARG    |
| Lucidumoside D_qt | P39900 | MMP12    |
| Lucidumoside D_qt | P45983 | MAPK8    |
| Lucidumoside D_qt | P55055 | NR1H2    |
| Lucidumoside D_qt | Q06520 | SULT2A1  |
| Lucidumoside D_qt | Q16539 | MAPK14   |
| Lucidusculine     | O15530 | PDPK1    |
| Lucidusculine     | O75469 | NR1I2    |
| Lucidusculine     | P00374 | DHFR     |
| Lucidusculine     | P00390 | GSR      |
| Lucidusculine     | P00533 | EGFR     |
| Lucidusculine     | P00734 | F2       |
| Lucidusculine     | P00742 | F10      |
| Lucidusculine     | P00747 | PLG      |
| Lucidusculine     | P01009 | SERPINA1 |
| Lucidusculine     | P02766 | TTR      |
| Lucidusculine     | P02768 | ALB      |
| Lucidusculine     | P03372 | ESR1     |
| Lucidusculine     | P03950 | ANG      |
| Lucidusculine     | P04179 | SOD2     |
| Lucidusculine     | P04818 | TYMS     |
| Lucidusculine     | P06276 | BCHE     |
| Lucidusculine     | P07900 | HSP90AA1 |
| Lucidusculine     | P08246 | ELANE    |
| Lucidusculine     | P08581 | MET      |
| Lucidusculine     | P08709 | F7       |
| Lucidusculine     | P08758 | ANXA5    |
| Lucidusculine     | P09211 | GSTP1    |
| Lucidusculine     | P11712 | CYP2C9   |
| Lucidusculine     | P12643 | BMP2     |
| Lucidusculine     | P12931 | SRC      |
| Lucidusculine     | P15559 | NQO1     |
| Lucidusculine     | P18031 | PTPN1    |
| Lucidusculine     | P21802 | FGFR2    |
| Lucidusculine     | P24941 | CDK2     |
| Lucidusculine     | P28482 | MAPK1    |
| Lucidusculine     | P29474 | NOS3     |
| Lucidusculine     | P30043 | BLVRB    |
| Lucidusculine     | P35398 | RORA     |
| Lucidusculine     | P35968 | KDR      |
| Lucidusculine     | P37231 | PPARG    |
| Lucidusculine     | P45983 | MAPK8    |
| Lucidusculine     | P49638 | TTPA     |
| Lucidusculine     | P55055 | NR1H2    |
| Lucidusculine     | Q00987 | MDM2     |
| Lucidusculine     | Q04828 | AKR1C1   |
| Lucidusculine     | Q06124 | PTPN11   |
| Lucidusculine     | Q06520 | SULT2A1  |
| Lucidusculine     | Q13133 | NR1H3    |
| Lucidusculine     | Q16539 | MAPK14   |

|                |        |          |
|----------------|--------|----------|
| Lucidusculine  | Q96RII | NR1H4    |
| Luteolin       | O15530 | PDPK1    |
| Luteolin       | P00374 | DHFR     |
| Luteolin       | P00390 | GSR      |
| Luteolin       | P00533 | EGFR     |
| Luteolin       | P00734 | F2       |
| Luteolin       | P00742 | F10      |
| Luteolin       | P02766 | TTR      |
| Luteolin       | P02768 | ALB      |
| Luteolin       | P03372 | ESR1     |
| Luteolin       | P03950 | ANG      |
| Luteolin       | P04818 | TYMS     |
| Luteolin       | P05067 | APP      |
| Luteolin       | P05089 | ARG1     |
| Luteolin       | P06276 | BCHE     |
| Luteolin       | P06737 | PYGL     |
| Luteolin       | P07900 | HSP90AA1 |
| Luteolin       | P08253 | MMP2     |
| Luteolin       | P09211 | GSTP1    |
| Luteolin       | P09874 | PARP1    |
| Luteolin       | P09917 | ALOX5    |
| Luteolin       | P11142 | HSPA8    |
| Luteolin       | P12931 | SRC      |
| Luteolin       | P14174 | MIF      |
| Luteolin       | P14780 | MMP9     |
| Luteolin       | P15559 | NQO1     |
| Luteolin       | P21397 | MAOA     |
| Luteolin       | P22303 | ACHE     |
| Luteolin       | P23141 | CES1     |
| Luteolin       | P24941 | CDK2     |
| Luteolin       | P28907 | CD38     |
| Luteolin       | P29474 | NOS3     |
| Luteolin       | P31749 | AKT1     |
| Luteolin       | P33527 | ABCC1    |
| Luteolin       | P35968 | KDR      |
| Luteolin       | P36888 | FLT3     |
| Luteolin       | P39900 | MMP12    |
| Luteolin       | P45983 | MAPK8    |
| Luteolin       | P47989 | XDH      |
| Luteolin       | P48736 | PIK3CG   |
| Luteolin       | Q04760 | GLO1     |
| Luteolin       | Q06520 | SULT2A1  |
| Luteolin       | Q16539 | MAPK14   |
| Luteolin       | Q16678 | CYP1B1   |
| Luteolin       | Q9UNQ0 | ABCG2    |
| Oleanolic acid | O15530 | PDPK1    |
| Oleanolic acid | P00390 | GSR      |
| Oleanolic acid | P00533 | EGFR     |
| Oleanolic acid | P00734 | F2       |
| Oleanolic acid | P00797 | REN      |
| Oleanolic acid | P02766 | TTR      |
| Oleanolic acid | P02768 | ALB      |
| Oleanolic acid | P03372 | ESR1     |
| Oleanolic acid | P06276 | BCHE     |
| Oleanolic acid | P07900 | HSP90AA1 |
| Oleanolic acid | P08581 | MET      |
| Oleanolic acid | P08758 | ANXA5    |
| Oleanolic acid | P09211 | GSTP1    |



|                |        |          |
|----------------|--------|----------|
| Oleanolic acid | P09874 | PARP1    |
| Oleanolic acid | P12643 | BMP2     |
| Oleanolic acid | P12931 | SRC      |
| Oleanolic acid | P15056 | BRAF     |
| Oleanolic acid | P18031 | PTPN1    |
| Oleanolic acid | P23141 | CES1     |
| Oleanolic acid | P24941 | CDK2     |
| Oleanolic acid | P28482 | MAPK1    |
| Oleanolic acid | P29474 | NOS3     |
| Oleanolic acid | P35398 | RORA     |
| Oleanolic acid | P35968 | KDR      |
| Oleanolic acid | P37231 | PPARG    |
| Oleanolic acid | P45983 | MAPK8    |
| Oleanolic acid | P55055 | NR1H2    |
| Oleanolic acid | Q04828 | AKR1C1   |
| Oleanolic acid | Q06124 | PTPN11   |
| Oleanolic acid | Q06520 | SULT2A1  |
| Oleanolic acid | Q16539 | MAPK14   |
| Oleanolic acid | Q96RI1 | NR1H4    |
| Olitoriside    | O15530 | PDPK1    |
| Olitoriside    | P00374 | DHFR     |
| Olitoriside    | P00390 | GSR      |
| Olitoriside    | P00533 | EGFR     |
| Olitoriside    | P00734 | F2       |
| Olitoriside    | P00742 | F10      |
| Olitoriside    | P00749 | PLAU     |
| Olitoriside    | P00797 | REN      |
| Olitoriside    | P02766 | TTR      |
| Olitoriside    | P02768 | ALB      |
| Olitoriside    | P03372 | ESR1     |
| Olitoriside    | P03950 | ANG      |
| Olitoriside    | P04818 | TYMS     |
| Olitoriside    | P05019 | IGF1     |
| Olitoriside    | P06276 | BCHE     |
| Olitoriside    | P06737 | PYGL     |
| Olitoriside    | P07900 | HSP90AA1 |
| Olitoriside    | P08246 | ELANE    |
| Olitoriside    | P08758 | ANXA5    |
| Olitoriside    | P09211 | GSTP1    |
| Olitoriside    | P11142 | HSPA8    |
| Olitoriside    | P11362 | FGFR1    |
| Olitoriside    | P12643 | BMP2     |
| Olitoriside    | P12931 | SRC      |
| Olitoriside    | P14174 | MIF      |
| Olitoriside    | P15056 | BRAF     |
| Olitoriside    | P15153 | RAC2     |
| Olitoriside    | P15559 | NQO1     |
| Olitoriside    | P23141 | CES1     |
| Olitoriside    | P24941 | CDK2     |
| Olitoriside    | P28482 | MAPK1    |
| Olitoriside    | P29474 | NOS3     |
| Olitoriside    | P31749 | AKT1     |
| Olitoriside    | P35398 | RORA     |
| Olitoriside    | P35968 | KDR      |
| Olitoriside    | P37231 | PPARG    |
| Olitoriside    | P39900 | MMP12    |
| Olitoriside    | P42574 | CASP3    |
| Olitoriside    | P45983 | MAPK8    |

|                |        |          |
|----------------|--------|----------|
| Olitoriside    | P49638 | TTPA     |
| Olitoriside    | P55055 | NR1H2    |
| Olitoriside    | Q06520 | SULT2A1  |
| Olitoriside    | Q07912 | TNK2     |
| Olitoriside    | Q13133 | NR1H3    |
| Olitoriside    | Q16539 | MAPK14   |
| Olitoriside_qt | O15530 | PDPK1    |
| Olitoriside_qt | P00374 | DHFR     |
| Olitoriside_qt | P00533 | EGFR     |
| Olitoriside_qt | P02766 | TTR      |
| Olitoriside_qt | P03372 | ESR1     |
| Olitoriside_qt | P04179 | SOD2     |
| Olitoriside_qt | P04818 | TYMS     |
| Olitoriside_qt | P08758 | ANXA5    |
| Olitoriside_qt | P12643 | BMP2     |
| Olitoriside_qt | P12931 | SRC      |
| Olitoriside_qt | P29474 | NOS3     |
| Olitoriside_qt | P37231 | PPARG    |
| Olitoriside_qt | P55055 | NR1H2    |
| Olitoriside_qt | Q06520 | SULT2A1  |
| Olitoriside_qt | Q16539 | MAPK14   |
| Pratensein     | O15530 | PDPK1    |
| Pratensein     | P00374 | DHFR     |
| Pratensein     | P00390 | GSR      |
| Pratensein     | P00533 | EGFR     |
| Pratensein     | P00734 | F2       |
| Pratensein     | P00742 | F10      |
| Pratensein     | P02766 | TTR      |
| Pratensein     | P02768 | ALB      |
| Pratensein     | P03372 | ESR1     |
| Pratensein     | P03950 | ANG      |
| Pratensein     | P04818 | TYMS     |
| Pratensein     | P06276 | BCHE     |
| Pratensein     | P06737 | PYGL     |
| Pratensein     | P07900 | HSP90AA1 |
| Pratensein     | P11142 | HSPA8    |
| Pratensein     | P11362 | FGFR1    |
| Pratensein     | P12931 | SRC      |
| Pratensein     | P14174 | MIF      |
| Pratensein     | P15559 | NQO1     |
| Pratensein     | P23141 | CES1     |
| Pratensein     | P24941 | CDK2     |
| Pratensein     | P29474 | NOS3     |
| Pratensein     | P31749 | AKT1     |
| Pratensein     | P35968 | KDR      |
| Pratensein     | P45983 | MAPK8    |
| Pratensein     | Q06520 | SULT2A1  |
| Pratensein     | Q07912 | TNK2     |
| Pratensein     | Q16539 | MAPK14   |
| Quercetin      | O15530 | PDPK1    |
| Quercetin      | O60285 | NUAK1    |
| Quercetin      | P00374 | DHFR     |
| Quercetin      | P00390 | GSR      |
| Quercetin      | P00533 | EGFR     |
| Quercetin      | P00734 | F2       |
| Quercetin      | P00797 | REN      |
| Quercetin      | P02766 | TTR      |
| Quercetin      | P03372 | ESR1     |

|             |        |          |
|-------------|--------|----------|
| Quercetin   | P03950 | ANG      |
| Quercetin   | P05164 | MPO      |
| Quercetin   | P06213 | INSR     |
| Quercetin   | P06276 | BCHE     |
| Quercetin   | P06737 | PYGL     |
| Quercetin   | P08183 | ABCB1    |
| Quercetin   | P08253 | MMP2     |
| Quercetin   | P08581 | MET      |
| Quercetin   | P09211 | GSTP1    |
| Quercetin   | P09917 | ALOX5    |
| Quercetin   | P10636 | MAPT     |
| Quercetin   | P11142 | HSPA8    |
| Quercetin   | P11362 | FGFR1    |
| Quercetin   | P12931 | SRC      |
| Quercetin   | P14174 | MIF      |
| Quercetin   | P14780 | MMP9     |
| Quercetin   | P15559 | NQO1     |
| Quercetin   | P21397 | MAOA     |
| Quercetin   | P22303 | ACHE     |
| Quercetin   | P24941 | CDK2     |
| Quercetin   | P27986 | PIK3R1   |
| Quercetin   | P31749 | AKT1     |
| Quercetin   | P33527 | ABCC1    |
| Quercetin   | P35968 | KDR      |
| Quercetin   | P36888 | FLT3     |
| Quercetin   | P45983 | MAPK8    |
| Quercetin   | P47989 | XDH      |
| Quercetin   | P48736 | PIK3CG   |
| Quercetin   | P55055 | NR1H2    |
| Quercetin   | Q04760 | GLO1     |
| Quercetin   | Q04828 | AKR1C1   |
| Quercetin   | Q15746 | MYLK     |
| Quercetin   | Q16539 | MAPK14   |
| Quercetin   | Q16678 | CYP1B1   |
| Quercetin   | Q96GD4 | AURKB    |
| Quercetin   | Q9UNQ0 | ABCG2    |
| Salidroside | O15530 | PDPK1    |
| Salidroside | P00374 | DHFR     |
| Salidroside | P00390 | GSR      |
| Salidroside | P00533 | EGFR     |
| Salidroside | P00734 | F2       |
| Salidroside | P00742 | F10      |
| Salidroside | P00797 | REN      |
| Salidroside | P02766 | TTR      |
| Salidroside | P03372 | ESR1     |
| Salidroside | P03950 | ANG      |
| Salidroside | P04035 | HMGCR    |
| Salidroside | P04179 | SOD2     |
| Salidroside | P04818 | TYMS     |
| Salidroside | P06276 | BCHE     |
| Salidroside | P06737 | PYGL     |
| Salidroside | P07900 | HSP90AA1 |
| Salidroside | P08758 | ANXA5    |
| Salidroside | P09211 | GSTP1    |
| Salidroside | P11142 | HSPA8    |
| Salidroside | P11362 | FGFR1    |
| Salidroside | P12931 | SRC      |
| Salidroside | P14174 | MIF      |

|                               |        |          |
|-------------------------------|--------|----------|
| Salidroside                   | P18031 | PTPN1    |
| Salidroside                   | P24941 | CDK2     |
| Salidroside                   | P28482 | MAPK1    |
| Salidroside                   | P29474 | NOS3     |
| Salidroside                   | P31749 | AKT1     |
| Salidroside                   | P35968 | KDR      |
| Salidroside                   | P37231 | PPARG    |
| Salidroside                   | P42574 | CASP3    |
| Salidroside                   | P45983 | MAPK8    |
| Salidroside                   | P55055 | NR1H2    |
| Salidroside                   | Q06520 | SULT2A1  |
| Salidroside                   | Q07912 | TNK2     |
| Salidroside                   | Q16539 | MAPK14   |
| Specnuezhenide                | O15530 | PDPK1    |
| Specnuezhenide                | P00374 | DHFR     |
| Specnuezhenide                | P00390 | GSR      |
| Specnuezhenide                | P00533 | EGFR     |
| Specnuezhenide                | P00734 | F2       |
| Specnuezhenide                | P00742 | F10      |
| Specnuezhenide                | P00749 | PLAU     |
| Specnuezhenide                | P02766 | TTR      |
| Specnuezhenide                | P03372 | ESR1     |
| Specnuezhenide                | P03950 | ANG      |
| Specnuezhenide                | P04035 | HMGCR    |
| Specnuezhenide                | P04179 | SOD2     |
| Specnuezhenide                | P04818 | TYMS     |
| Specnuezhenide                | P06276 | BCHE     |
| Specnuezhenide                | P06737 | PYGL     |
| Specnuezhenide                | P07900 | HSP90AA1 |
| Specnuezhenide                | P08758 | ANXA5    |
| Specnuezhenide                | P09211 | GSTP1    |
| Specnuezhenide                | P11142 | HSPA8    |
| Specnuezhenide                | P11362 | FGFR1    |
| Specnuezhenide                | P12931 | SRC      |
| Specnuezhenide                | P14174 | MIF      |
| Specnuezhenide                | P18031 | PTPN1    |
| Specnuezhenide                | P23141 | CES1     |
| Specnuezhenide                | P24941 | CDK2     |
| Specnuezhenide                | P29474 | NOS3     |
| Specnuezhenide                | P31749 | AKT1     |
| Specnuezhenide                | P35968 | KDR      |
| Specnuezhenide                | P37231 | PPARG    |
| Specnuezhenide                | P39900 | MMP12    |
| Specnuezhenide                | P42574 | CASP3    |
| Specnuezhenide                | P45983 | MAPK8    |
| Specnuezhenide                | P55055 | NR1H2    |
| Specnuezhenide                | P60568 | IL2      |
| Specnuezhenide                | Q06520 | SULT2A1  |
| Specnuezhenide                | Q07912 | TNK2     |
| Specnuezhenide                | Q16539 | MAPK14   |
| Syringaresinol diglucoside_qt | O15530 | PDPK1    |
| Syringaresinol diglucoside_qt | O75469 | NR1I2    |
| Syringaresinol diglucoside_qt | P00374 | DHFR     |
| Syringaresinol diglucoside_qt | P00390 | GSR      |
| Syringaresinol diglucoside_qt | P00533 | EGFR     |
| Syringaresinol diglucoside_qt | P00734 | F2       |
| Syringaresinol diglucoside_qt | P00742 | F10      |
| Syringaresinol diglucoside_qt | P00797 | REN      |

|                               |        |          |
|-------------------------------|--------|----------|
| Syringaresinol diglucoside_qt | P02753 | RBP4     |
| Syringaresinol diglucoside_qt | P02766 | TTR      |
| Syringaresinol diglucoside_qt | P02768 | ALB      |
| Syringaresinol diglucoside_qt | P03372 | ESR1     |
| Syringaresinol diglucoside_qt | P03950 | ANG      |
| Syringaresinol diglucoside_qt | P04179 | SOD2     |
| Syringaresinol diglucoside_qt | P04818 | TYMS     |
| Syringaresinol diglucoside_qt | P05019 | IGF1     |
| Syringaresinol diglucoside_qt | P06276 | BCHE     |
| Syringaresinol diglucoside_qt | P06737 | PYGL     |
| Syringaresinol diglucoside_qt | P07900 | HSP90AA1 |
| Syringaresinol diglucoside_qt | P08246 | ELANE    |
| Syringaresinol diglucoside_qt | P08581 | MET      |
| Syringaresinol diglucoside_qt | P08709 | F7       |
| Syringaresinol diglucoside_qt | P09211 | GSTP1    |
| Syringaresinol diglucoside_qt | P09874 | PARP1    |
| Syringaresinol diglucoside_qt | P11142 | HSPA8    |
| Syringaresinol diglucoside_qt | P11362 | FGFR1    |
| Syringaresinol diglucoside_qt | P11712 | CYP2C9   |
| Syringaresinol diglucoside_qt | P12931 | SRC      |
| Syringaresinol diglucoside_qt | P14174 | MIF      |
| Syringaresinol diglucoside_qt | P15056 | BRAF     |
| Syringaresinol diglucoside_qt | P15559 | NQO1     |
| Syringaresinol diglucoside_qt | P16109 | SELP     |
| Syringaresinol diglucoside_qt | P18031 | PTPN1    |
| Syringaresinol diglucoside_qt | P21802 | FGFR2    |
| Syringaresinol diglucoside_qt | P23141 | CES1     |
| Syringaresinol diglucoside_qt | P24941 | CDK2     |
| Syringaresinol diglucoside_qt | P28482 | MAPK1    |
| Syringaresinol diglucoside_qt | P29474 | NOS3     |
| Syringaresinol diglucoside_qt | P30043 | BLVRB    |
| Syringaresinol diglucoside_qt | P35398 | RORA     |
| Syringaresinol diglucoside_qt | P35968 | KDR      |
| Syringaresinol diglucoside_qt | P37231 | PPARG    |
| Syringaresinol diglucoside_qt | P39900 | MMP12    |
| Syringaresinol diglucoside_qt | P42574 | CASP3    |
| Syringaresinol diglucoside_qt | P45983 | MAPK8    |
| Syringaresinol diglucoside_qt | P48736 | PIK3CG   |
| Syringaresinol diglucoside_qt | P55055 | NR1H2    |
| Syringaresinol diglucoside_qt | Q00987 | MDM2     |
| Syringaresinol diglucoside_qt | Q04828 | AKR1C1   |
| Syringaresinol diglucoside_qt | Q06520 | SULT2A1  |
| Syringaresinol diglucoside_qt | Q07869 | PPARA    |
| Syringaresinol diglucoside_qt | Q13133 | NR1H3    |
| Syringaresinol diglucoside_qt | Q16539 | MAPK14   |
| Taxifolin                     | O15530 | PDPK1    |
| Taxifolin                     | P00374 | DHFR     |
| Taxifolin                     | P00390 | GSR      |
| Taxifolin                     | P00533 | EGFR     |
| Taxifolin                     | P00734 | F2       |
| Taxifolin                     | P00742 | F10      |
| Taxifolin                     | P00749 | PLAU     |
| Taxifolin                     | P02766 | TTR      |
| Taxifolin                     | P02768 | ALB      |
| Taxifolin                     | P03372 | ESR1     |
| Taxifolin                     | P03950 | ANG      |
| Taxifolin                     | P06276 | BCHE     |
| Taxifolin                     | P06737 | PYGL     |

|               |        |          |
|---------------|--------|----------|
| Taxifolin     | P07900 | HSP90AA1 |
| Taxifolin     | P08758 | ANXA5    |
| Taxifolin     | P09211 | GSTP1    |
| Taxifolin     | P11142 | HSPA8    |
| Taxifolin     | P12931 | SRC      |
| Taxifolin     | P15559 | NQO1     |
| Taxifolin     | P23141 | CES1     |
| Taxifolin     | P24941 | CDK2     |
| Taxifolin     | P29474 | NOS3     |
| Taxifolin     | P35968 | KDR      |
| Taxifolin     | P39900 | MMP12    |
| Taxifolin     | P45983 | MAPK8    |
| Taxifolin     | P48736 | PIK3CG   |
| Taxifolin     | P55055 | NR1H2    |
| Taxifolin     | Q06520 | SULT2A1  |
| Taxifolin     | Q16539 | MAPK14   |
| Wedelolactone | O15530 | PDPK1    |
| Wedelolactone | P00374 | DHFR     |
| Wedelolactone | P00390 | GSR      |
| Wedelolactone | P00533 | EGFR     |
| Wedelolactone | P00734 | F2       |
| Wedelolactone | P00742 | F10      |
| Wedelolactone | P02766 | TTR      |
| Wedelolactone | P02768 | ALB      |
| Wedelolactone | P03372 | ESR1     |
| Wedelolactone | P03950 | ANG      |
| Wedelolactone | P04179 | SOD2     |
| Wedelolactone | P04818 | TYMS     |
| Wedelolactone | P06276 | BCHE     |
| Wedelolactone | P07900 | HSP90AA1 |
| Wedelolactone | P09211 | GSTP1    |
| Wedelolactone | P09917 | ALOX5    |
| Wedelolactone | P11142 | HSPA8    |
| Wedelolactone | P11362 | FGFR1    |
| Wedelolactone | P12643 | BMP2     |
| Wedelolactone | P12931 | SRC      |
| Wedelolactone | P14174 | MIF      |
| Wedelolactone | P23141 | CES1     |
| Wedelolactone | P24941 | CDK2     |
| Wedelolactone | P29474 | NOS3     |
| Wedelolactone | P35968 | KDR      |
| Wedelolactone | P45983 | MAPK8    |
| Wedelolactone | P48736 | PIK3CG   |
| Wedelolactone | P55055 | NR1H2    |
| Wedelolactone | Q06520 | SULT2A1  |
| Wedelolactone | Q16539 | MAPK14   |
