# Supplementary material for: Systematic Elucidation of the Potential Mechanism of Erzhi Pill against Drug‐Induced Liver Injury via Network Pharmacology Approach
Source: Hindawi journal article supplement (doi:10.1155/2020/6219432), 2020-01-01
Supplement: f1 [file 6219432.f1.zip]

**Title: Uncovering the pharmacological mechanism of Erzhi pill on drug-induced liver injury based on network pharmacology**

**Table S4 The results of GO and KEGG pathway enrichment**

| Category     | Term                                | Count | %     | PValue  | Genes                                                                                                                                                                                  |
|--------------|-------------------------------------|-------|-------|---------|----------------------------------------------------------------------------------------------------------------------------------------------------------------------------------------|
| KEGG_PATHWAY | hsa05200:Pathways in cancer         | 23    | 25.84 | 1E-10   | P05019, P36888, P11362, P08581, P48736, P14780, P35228, P24941, P07900, P27986, Q00987, P15153, P09211, P08253, P28482, P21802, P42574, P37231, P00533, P12643, P31749, P15056, P45983 |
| KEGG_PATHWAY | hsa05205:Proteoglycans in cancer    | 20    | 22.47 | 2.4E-13 | P05019, P12931, P11362, P08581, P48736, P14780, P03372, P27986, P35968, O15530, Q00987, P08253, Q06124, P28482, P42574, P00749, Q16539, P00533, P31749, P15056                         |
| KEGG_PATHWAY | hsa04151:PI3K-Akt signaling pathway | 17    | 19.10 | 7.8E-07 | P05019, P11362, P08581, P48736, P24941, P60568, P07900, P27986, P35968, O15530, Q00987, P29474, P21802, P28482, P06213, P00533, P31749                                                 |
| KEGG_PATHWAY | hsa04015:Rap1 signaling pathway     | 15    | 16.85 | 5.1E-08 | P05019, P12931, P11362, P08581, P48736, P27986, P35968, P15153, P21802, P28482, P06213, Q16539, P00533, P31749, P15056                                                                 |
| KEGG_PATHWAY | hsa04068:FoxO signaling pathway     | 14    | 15.73 | 1.7E-09 | P05019, P48736, P24941, P27986, O15530, Q00987, P04179, P28482, P06213, Q16539, P00533, P31749, P45983, P15056                                                                         |
| KEGG_PATHWAY | hsa04510:Focal adhesion             | 14    | 15.73 | 3.1E-07 | P05019, P12931, P08581, P48736, P27986, P35968, Q15746, O15530, P15153, P28482, P00533, P31749, P45983, P15056                                                                         |
| KEGG_PATHWAY | hsa04014:Ras signaling pathway      | 14    | 15.73 | 9E-07   | P05019, P27986, P35968, P15153, P11362, Q06124, P08581, P28482, P21802, P48736, P06213, P00533, P31749, P45983                                                                         |
| KEGG_PATHWAY | hsa05215:Prostate cancer            | 13    | 14.61 | 1.4E-10 | P05019, P11362, P48736, P24941, P27986, P07900, O15530, Q00987, P21802, P28482, P00533, P31749, P15056                                                                                 |
| KEGG_PATHWAY | hsa04931:Insulin resistance         | 13    | 14.61 | 1.6E-09 | Q13133, P48736, P06737, P18031, P27986, O15530, P29474, Q06124, P06213, Q07869, P31749, P55055, P45983                                                                                 |
| KEGG_PATHWAY | hsa04915:Estrogen signaling pathway | 12    | 13.48 | 8.2E-09 | P07900, P27986, P11142, P03372, P12931, P29474, P08253, P28482, P48736, P14780, P00533, P31749                                                                                         |
| KEGG_PATHWAY | hsa04010:MAPK signaling pathway     | 12    | 13.48 | 9.2E-05 | P10636, P11142, P15153, P11362, P28482, P21802, P42574, Q16539, P00533, P31749, P15056, P45983                                                                                         |

|              |                                                                   |    |       |         |                                                                                        |
|--------------|-------------------------------------------------------------------|----|-------|---------|----------------------------------------------------------------------------------------|
| KEGG_PATHWAY | hsa05160:Hepatitis C                                              | 11 | 12.36 | 1.7E-06 | P27986, Q13133, O15530, P28482, P48736, Q16539, Q07869, P00533, P31749, P15056, P45983 |
| KEGG_PATHWAY | hsa04810:Regulation of actin cytoskeleton                         | 11 | 12.36 | 9.3E-05 | P27986, Q15746, P12931, P15153, P11362, P28482, P21802, P48736, P00533, P00734, P15056 |
| KEGG_PATHWAY | hsa05218:Melanoma                                                 | 10 | 11.24 | 6.5E-08 | P27986, P05019, Q00987, P11362, P08581, P28482, P48736, P00533, P31749, P15056         |
| KEGG_PATHWAY | hsa04914:Progesterone-mediated oocyte maturation                  | 10 | 11.24 | 3.9E-07 | P07900, P27986, P05019, P28482, P48736, Q16539, P24941, P31749, P15056, P45983         |
| KEGG_PATHWAY | hsa04071:Sphingolipid signaling pathway                           | 10 | 11.24 | 5.9E-06 | P27986, O15530, P15153, P33527, P29474, P28482, P48736, Q16539, P31749, P45983         |
| KEGG_PATHWAY | hsa04910:Insulin signaling pathway                                | 10 | 11.24 | 1.8E-05 | P27986, O15530, P28482, P48736, P06213, P06737, P18031, P31749, P15056, P45983         |
| KEGG_PATHWAY | hsa04370:VEGF signaling pathway                                   | 9  | 10.11 | 2.8E-07 | P27986, P35968, P12931, P15153, P29474, P28482, P48736, Q16539, P31749                 |
| KEGG_PATHWAY | hsa05230:Central carbon metabolism in cancer                      | 9  | 10.11 | 4.1E-07 | P27986, P36888, P11362, P08581, P28482, P21802, P48736, P00533, P31749                 |
| KEGG_PATHWAY | hsa04066:HIF-1 signaling pathway                                  | 9  | 10.11 | 9.3E-06 | P27986, P05019, P29474, P28482, P48736, P06213, P35228, P00533, P31749                 |
| KEGG_PATHWAY | hsa05145:Toxoplasmosis                                            | 9  | 10.11 | 2.5E-05 | P11142, P09917, O15530, P28482, P42574, Q16539, P35228, P31749, P45983                 |
| KEGG_PATHWAY | hsa04722:Neurotrophin signaling pathway                           | 9  | 10.11 | 4.8E-05 | P27986, O15530, Q06124, P28482, P48736, Q16539, P31749, P15056, P45983                 |
| KEGG_PATHWAY | hsa04550:Signaling pathways regulating pluripotency of stem cells | 9  | 10.11 | 0.00014 | P27986, P05019, P11362, P28482, P21802, P48736, Q16539, P12643, P31749                 |
| KEGG_PATHWAY | hsa05161:Hepatitis B                                              | 9  | 10.11 | 0.00018 | P27986, P12931, P28482, P48736, P42574, P14780, P24941, P31749, P45983                 |
| KEGG_PATHWAY | hsa05202:Transcriptional misregulation in cancer                  | 9  | 10.11 | 0.00047 | P05164, P08246, P05019, P36888, Q00987, P08581, P14780, P00749, P37231                 |
| KEGG_PATHWAY | hsa05206:MicroRNAs in cancer                                      | 9  | 10.11 | 0.01314 | Q00987, P33527, P08183, P08581, P42574, Q16678, P14780, P00749, P00533                 |
| KEGG_PATHWAY | hsa05210:Colorectal cancer                                        | 8  | 8.99  | 4.6E-06 | P27986, P15153, P28482, P48736, P42574, P31749, P15056, P45983                         |
| KEGG_PATHWAY | hsa05212:Pancreatic cancer                                        | 8  | 8.99  | 6.3E-06 | P27986, P15153, P28482, P48736, P00533, P31749, P15056, P45983                         |
| KEGG_PATHWAY | hsa05214:Glioma                                                   | 8  | 8.99  | 6.3E-06 | P27986, P05019, Q00987, P28482, P48736, P00533, P31749, P15056                         |
| KEGG_PATHWAY | hsa04664:Fc epsilon RI signaling                                  | 8  | 8.99  | 8.6E-06 | P27986, O15530, P15153, P28482, P48736, Q16539, P31749, P45983                         |

|              |                                                                     |   |      |         |                                                                |
|--------------|---------------------------------------------------------------------|---|------|---------|----------------------------------------------------------------|
| KEGG_PATHWAY | hsa04520:Adherens junction                                          | 8 | 8.99 | 1.1E-05 | P12931, P15153, P11362, P08581, P28482, P06213, P00533, P18031 |
| KEGG_PATHWAY | hsa04917:Prolactin signaling pathway                                | 8 | 8.99 | 1.1E-05 | P27986, P03372, P12931, P28482, P48736, Q16539, P31749, P45983 |
| KEGG_PATHWAY | hsa04012:ErbB signaling pathway                                     | 8 | 8.99 | 4.4E-05 | P27986, P12931, P28482, P48736, P00533, P31749, P15056, P45983 |
| KEGG_PATHWAY | hsa05231:Choline metabolism in                                      | 8 | 8.99 | 0.00011 | P27986, Q15530, P15153, P28482, P48736, P00533, P31749, P45983 |
| KEGG_PATHWAY | hsa05142:Chagas disease (American trypanosomiasis)                  | 8 | 8.99 | 0.00014 | P60568, P27986, P28482, P48736, Q16539, P35228, P31749, P45983 |
| KEGG_PATHWAY | hsa04668:TNF signaling pathway                                      | 8 | 8.99 | 0.00016 | P27986, P28482, P48736, P42574, P14780, Q16539, P31749, P45983 |
| KEGG_PATHWAY | hsa04919:Thyroid hormone signaling pathway                          | 8 | 8.99 | 0.00026 | P27986, P03372, P12931, Q15530, Q00987, P28482, P48736, P31749 |
| KEGG_PATHWAY | hsa04152:AMPK signaling pathway                                     | 8 | 8.99 | 0.00039 | P27986, P05019, Q15530, P48736, P04035, P06213, P37231, P31749 |
| KEGG_PATHWAY | hsa04611:Platelet activation                                        | 8 | 8.99 | 0.00054 | P27986, Q15746, P12931, P29474, P28482, P48736, Q16539, P31749 |
| KEGG_PATHWAY | hsa04932:Non-alcoholic fatty liver disease (NAFLD)                  | 8 | 8.99 | 0.00132 | P27986, Q13133, P48736, P42574, P06213, Q07869, P31749, P45983 |
| KEGG_PATHWAY | hsa05164:Influenza A                                                | 8 | 8.99 | 0.00296 | P27986, P11142, P28482, P48736, Q16539, P00747, P31749, P45983 |
| KEGG_PATHWAY | hsa04024:cAMP signaling pathway                                     | 8 | 8.99 | 0.00601 | P27986, P15153, P28482, P48736, Q07869, P31749, P15056, P45983 |
| KEGG_PATHWAY | hsa05219:Bladder cancer                                             | 7 | 7.87 | 4.9E-06 | P12931, Q00987, P08253, P28482, P14780, P00533, P15056         |
| KEGG_PATHWAY | hsa05213:Endometrial cancer                                         | 7 | 7.87 | 2E-05   | P27986, Q15530, P28482, P48736, P00533, P31749, P15056         |
| KEGG_PATHWAY | hsa05223:Non-small cell lung                                        | 7 | 7.87 | 3.1E-05 | P27986, Q15530, P28482, P48736, P00533, P31749, P15056         |
| KEGG_PATHWAY | hsa04150:mTOR signaling pathway                                     | 7 | 7.87 | 3.8E-05 | P27986, P05019, Q15530, P28482, P48736, P31749, P15056         |
| KEGG_PATHWAY | hsa05211:Renal cell carcinoma                                       | 7 | 7.87 | 8E-05   | P27986, P08581, Q06124, P28482, P48736, P31749, P15056         |
| KEGG_PATHWAY | hsa05120:Epithelial cell signaling in Helicobacter pylori infection | 7 | 7.87 | 8.7E-05 | P12931, P08581, Q06124, P42574, Q16539, P00533, P45983         |
| KEGG_PATHWAY | hsa05220:Chronic myeloid leukemia                                   | 7 | 7.87 | 0.00013 | P27986, Q00987, Q06124, P28482, P48736, P31749, P15056         |
| KEGG_PATHWAY | hsa04660:T cell receptor signaling pathway                          | 7 | 7.87 | 0.00078 | P60568, P27986, Q15530, P28482, P48736, Q16539, P31749         |
| KEGG_PATHWAY | hsa04726:Serotonergic synapse                                       | 7 | 7.87 | 0.00135 | P09917, P28482, P21397, P42574, P05067, P11712, P15056         |
| KEGG_PATHWAY | hsa04670:Leukocyte transendothelial migration                       | 7 | 7.87 | 0.00162 | P27986, P15153, P08253, Q06124, P48736, P14780, Q16539         |
| KEGG_PATHWAY | hsa04650:Natural killer cell mediated cytotoxicity                  | 7 | 7.87 | 0.00219 | P27986, P15153, Q06124, P28482, P48736, P42574, P15056         |
| KEGG_PATHWAY | hsa05169:Epstein-Barr virus infection                               | 7 | 7.87 | 0.00219 | P27986, Q00987, P48736, Q16539, P24941, P31749, P45983         |
| KEGG_PATHWAY | hsa04380:Osteoclast differentiation                                 | 7 | 7.87 | 0.00313 | P27986, P28482, P48736, Q16539, P37231, P31749, P45983         |

|              |                                                           |   |      |         |                                                        |
|--------------|-----------------------------------------------------------|---|------|---------|--------------------------------------------------------|
| KEGG_PATHWAY | hsa05152:Tuberculosis                                     | 7 | 7.87 | 0.01317 | P12931, P28482, P42574, Q16539, P35228, P31749, P45983 |
| KEGG_PATHWAY | hsa04062:Chemokine signaling pathway                      | 7 | 7.87 | 0.01647 | P27986, P12931, P15153, P28482, P48736, P31749, P15056 |
| KEGG_PATHWAY | hsa05203:Viral carcinogenesis                             | 7 | 7.87 | 0.02527 | P27986, P12931, Q00987, P28482, P48736, P42574, P24941 |
| KEGG_PATHWAY | hsa04960:Aldosterone-regulated sodium reabsorption        | 6 | 6.74 | 6.2E-05 | P27986, P05019, O15530, P28482, P48736, P06213         |
| KEGG_PATHWAY | hsa05221:Acute myeloid leukemia                           | 6 | 6.74 | 0.00035 | P27986, P36888, P28482, P48736, P31749, P15056         |
| KEGG_PATHWAY | hsa04610:Complement and coagulation cascades              | 6 | 6.74 | 0.00093 | P00742, P01009, P00749, P00747, P00734, P08709         |
| KEGG_PATHWAY | hsa04912:GnRH signaling pathway                           | 6 | 6.74 | 0.0032  | P12931, P08253, P28482, Q16539, P00533, P45983         |
| KEGG_PATHWAY | hsa04750:Inflammatory mediator regulation of TRP channels | 6 | 6.74 | 0.0044  | P27986, P05019, P12931, P48736, Q16539, P45983         |
| KEGG_PATHWAY | hsa04620:Toll-like receptor signaling pathway             | 6 | 6.74 | 0.00614 | P27986, P28482, P48736, Q16539, P31749, P45983         |
| KEGG_PATHWAY | hsa05162:Measles                                          | 6 | 6.74 | 0.01548 | P60568, P27986, P11142, P48736, P24941, P31749         |
| KEGG_PATHWAY | hsa04921:Oxytocin signaling pathway                       | 6 | 6.74 | 0.02468 | P28907, Q15746, P12931, P29474, P28482, P00533         |
| KEGG_PATHWAY | hsa04930:Type II diabetes mellitus                        | 5 | 5.62 | 0.00185 | P27986, P28482, P48736, P06213, P45983                 |
| KEGG_PATHWAY | hsa04976:Bile secretion                                   | 5 | 5.62 | 0.00692 | P08183, Q96RI1, Q9UNQ0, P04035, Q06520                 |
| KEGG_PATHWAY | hsa04662:B cell receptor signaling pathway                | 5 | 5.62 | 0.00692 | P27986, P15153, P28482, P48736, P31749                 |
| KEGG_PATHWAY | hsa00980:Metabolism of xenobiotics by cytochrome P450     | 5 | 5.62 | 0.00883 | P09211, Q16678, P11712, Q06520, Q04828                 |
| KEGG_PATHWAY | hsa05133:Pertussis                                        | 5 | 5.62 | 0.00925 | P28482, P42574, Q16539, P35228, P45983                 |
| KEGG_PATHWAY | hsa04666:Fc gamma R-mediated phagocytosis                 | 5 | 5.62 | 0.01364 | P27986, P15153, P28482, P48736, P31749                 |
| KEGG_PATHWAY | hsa05222:Small cell lung cancer                           | 5 | 5.62 | 0.01419 | P27986, P48736, P24941, P35228, P31749                 |
| KEGG_PATHWAY | hsa05146:Amoebiasis                                       | 5 | 5.62 | 0.02931 | P27986, P05089, P48736, P42574, P35228                 |
| KEGG_PATHWAY | hsa04725:Cholinergic synapse                              | 5 | 5.62 | 0.03393 | P27986, P28482, P48736, P22303, P31749                 |
| KEGG_PATHWAY | hsa04913:Ovarian steroidogenesis                          | 4 | 4.49 | 0.01659 | P05019, P09917, Q16678, P06213                         |
| KEGG_PATHWAY | hsa00330:Arginine and proline metabolism                  | 4 | 4.49 | 0.01752 | P05089, P29474, P21397, P35228                         |
| KEGG_PATHWAY | hsa04923:Regulation of lipolysis in adipocytes            | 4 | 4.49 | 0.02364 | P27986, P48736, P06213, P31749                         |

|                  |                                                                                 |    |       |         |                                                                                                                                                                                        |
|------------------|---------------------------------------------------------------------------------|----|-------|---------|----------------------------------------------------------------------------------------------------------------------------------------------------------------------------------------|
| KEGG_PATHWAY     | hsa04621:NOD-like receptor signaling pathway                                    | 4  | 4.49  | 0.02364 | P07900, P28482, Q16539, P45983                                                                                                                                                         |
| KEGG_PATHWAY     | hsa04210:Apoptosis                                                              | 4  | 4.49  | 0.03078 | P27986, P48736, P42574, P31749                                                                                                                                                         |
| KEGG_PATHWAY     | hsa05131:Shigellosis                                                            | 4  | 4.49  | 0.03338 | P12931, P28482, Q16539, P45983                                                                                                                                                         |
| KEGG_PATHWAY     | hsa04115:p53 signaling pathway                                                  | 4  | 4.49  | 0.0375  | P05019, Q00987, P42574, P24941                                                                                                                                                         |
| KEGG_PATHWAY     | hsa03320:PPAR signaling pathway                                                 | 4  | 4.49  | 0.0375  | Q13133, O15530, P37231, Q07869                                                                                                                                                         |
| KEGG_PATHWAY     | hsa04920:Adipocytokine signaling pathway                                        | 4  | 4.49  | 0.04186 | Q06124, Q07869, P31749, P45983                                                                                                                                                         |
| KEGG_PATHWAY     | hsa00220:Arginine biosynthesis                                                  | 3  | 3.37  | 0.02013 | P05089, P29474, P35228                                                                                                                                                                 |
| KEGG_PATHWAY     | hsa05216:Thyroid cancer                                                         | 3  | 3.37  | 0.04035 | P28482, P37231, P15056                                                                                                                                                                 |
| GOTERM_BP_DIRECT | GO:0043066~negative regulation of apoptotic process                             | 22 | 24.72 | 1.5E-14 | P05019, P12931, P02768, Q04760, P14780, P14174, P05164, P28907, P60568, P27986, P35968, Q00987, P09211, P04179, Q96RI1, P42574, P15559, P08758, P00533, P31749, P15055, P15082, P15083 |
| GOTERM_BP_DIRECT | GO:0045944~positive regulation of transcription from RNA polymerase II promoter | 19 | 21.35 | 2.7E-06 | Q13133, P05019, P08581, O75469, P05067, P09874, P35398, P60568, P27986, P03372, Q96RI1, P21802, P37231, Q16539, P00533, Q07869, P12643, P31749, P55055                                 |
| GOTERM_BP_DIRECT | GO:0007165~signal transduction                                                  | 17 | 19.10 | 0.00031 | P05019, P12931, P08581, O75469, P28907, P03372, P27986, P07900, P15153, Q96RI1, P28482, P00749, P37231, P08758, Q16539, P00533, P31749                                                 |
| GOTERM_BP_DIRECT | GO:0055114~oxidation-reduction process                                          | 16 | 17.98 | 4E-07   | P09917, P47989, P00390, P35228, P04035, P11712, P05164, P30043, P04179, P29474, P21397, Q16678, P15550, P12643, Q04828, P00374                                                         |
| GOTERM_BP_DIRECT | GO:0045893~positive regulation of transcription, DNA-templated                  | 14 | 15.73 | 2.7E-06 | P05019, Q13133, P12931, O75469, P24941, P35398, P28907, P03372, P28482, P37231, P06213, Q07869, P12643, P55055                                                                         |
| GOTERM_BP_DIRECT | GO:0042493~response to drug                                                     | 13 | 14.61 | 6E-08   | P28907, P07900, P12931, Q00987, P33527, P04179, P08183, P05089, P04818, Q9UNQ0, P42574, P37231, P06276                                                                                 |
| GOTERM_BP_DIRECT | GO:0006468~protein phosphorylation                                              | 13 | 14.61 | 4.4E-06 | P27986, Q15746, O15530, Q96GD4, P11362, P28482, P48736, O60285, P05067, P12643, P31749, P15056, P45082                                                                                 |
| GOTERM_BP_DIRECT | GO:0008284~positive regulation of cell proliferation                            | 13 | 14.61 | 5.5E-06 | P60568, P05019, P36888, P35968, Q00987, P15153, P11362, P28482, P21802, P06213, P24941, P00533, P00724                                                                                 |
| GOTERM_BP_DIRECT | GO:0000122~negative regulation of transcription from RNA polymerase II promoter | 13 | 14.61 | 0.00036 | Q13133, P11362, P09874, P08246, P03372, Q00987, Q96GD4, Q96RI1, P21802, P37231, Q07869, P12643, P55055                                                                                 |

|                  |                                                                |    |       |         |                                                                                        |
|------------------|----------------------------------------------------------------|----|-------|---------|----------------------------------------------------------------------------------------|
| GOTERM_BP_DIRECT | GO:0030335~positive regulation of cell migration               | 11 | 12.36 | 4.2E-08 | P27986, P00742, P05019, P35968, Q15746, P28482, P00749, P06213, P00533, P12643, P08709 |
| GOTERM_BP_DIRECT | GO:0046777~protein autophosphorylation                         | 10 | 11.24 | 2.9E-07 | P36888, P35968, P12931, O15530, Q96GD4, P11362, P21802, P06213, P00533, P31749         |
| GOTERM_BP_DIRECT | GO:0001666~response to hypoxia                                 | 10 | 11.24 | 2.9E-07 | P28907, P04179, P08253, P03950, P42574, P00749, P35228, Q07869, P12643, P08709         |
| GOTERM_BP_DIRECT | GO:0001525~angiogenesis                                        | 10 | 11.24 | 2.5E-06 | P35968, P11362, P29474, P08253, P21802, P48736, P03950, Q16678, O16539, P35398         |
| GOTERM_BP_DIRECT | GO:0048015~phosphatidylinositol-mediated signaling             | 9  | 10.11 | 8.2E-08 | P27986, P05019, O15530, P11362, Q06124, P21802, P48736, P00533, P31749                 |
| GOTERM_BP_DIRECT | GO:0030168~platelet activation                                 | 9  | 10.11 | 1.5E-07 | P27986, P12931, O15530, P15153, Q06124, P28482, P48736, P00734, P31749                 |
| GOTERM_BP_DIRECT | GO:0018108~peptidyl-tyrosine phosphorylation                   | 9  | 10.11 | 1.4E-06 | P07900, P36888, P35968, P12931, P11362, P08581, P21802, P06213, P00533                 |
| GOTERM_BP_DIRECT | GO:0070374~positive regulation of ERK1 and ERK2                | 9  | 10.11 | 3.7E-06 | P35968, P12931, Q06124, P21802, P14174, P04035, P00533, P12643, P15056                 |
| GOTERM_BP_DIRECT | GO:0008283~cell proliferation                                  | 9  | 10.11 | 0.00067 | P05019, P12931, Q96GD4, P04818, P08581, P22303, P14174, P00533, P31749                 |
| GOTERM_BP_DIRECT | GO:0006508~proteolysis                                         | 9  | 10.11 | 0.00468 | P08246, P08253, P42574, P14780, P00749, P00747, P00734, P39900, P00797                 |
| GOTERM_BP_DIRECT | GO:0043401~steroid hormone mediated signaling pathway          | 8  | 8.99  | 1.8E-08 | Q13133, P03372, Q96RII, O75469, P37231, Q07869, P35398, P55055                         |
| GOTERM_BP_DIRECT | GO:0032869~cellular response to insulin stimulus               | 8  | 8.99  | 1.5E-07 | P27986, P12931, O15530, P09211, P06213, P37231, P09874, P31749                         |
| GOTERM_BP_DIRECT | GO:0006805~xenobiotic metabolic process                        | 8  | 8.99  | 1.7E-07 | P09211, P23141, Q16678, O75469, P15559, P11712, P35398, Q04828                         |
| GOTERM_BP_DIRECT | GO:0009636~response to toxic                                   | 8  | 8.99  | 3E-07   | Q00987, P09211, P04818, P28482, P23141, P49638, O16678, P15559                         |
| GOTERM_BP_DIRECT | GO:0071222~cellular response to lipopolysaccharide             | 8  | 8.99  | 2.1E-06 | Q13133, P12931, P09211, P05089, Q96RII, Q16539, P35228, P45983                         |
| GOTERM_BP_DIRECT | GO:0006367~transcription initiation from RNA polymerase II     | 8  | 8.99  | 1.5E-05 | Q13133, P03372, Q96RII, O75469, P37231, Q07869, P35398, P55055                         |
| GOTERM_BP_DIRECT | GO:0045087~innate immune response                              | 8  | 8.99  | 0.00736 | P12931, Q96RII, P48736, P03950, O07912, P14174, P05067, P37231                         |
| GOTERM_BP_DIRECT | GO:0045892~negative regulation of transcription, DNA-templated | 8  | 8.99  | 0.01576 | P28907, P11142, P12931, Q00987, O75469, P37231, P12643, P55055                         |
| GOTERM_BP_DIRECT | GO:0043406~positive regulation of MAP kinase activity          | 7  | 7.87  | 6.3E-07 | P08246, P36888, P12931, P11362, P48736, P14174, P00533                                 |

|                  |                                                                             |   |      |         |                                                        |
|------------------|-----------------------------------------------------------------------------|---|------|---------|--------------------------------------------------------|
| GOTERM_BP_DIRECT | GO:0014066~regulation of phosphatidylinositol 3-kinase signaling            | 7 | 7.87 | 3.3E-06 | P27986, P11362, Q06124, P28482, P21802, P00533, P31749 |
| GOTERM_BP_DIRECT | GO:0043410~positive regulation of MAPK cascade                              | 7 | 7.87 | 4.1E-06 | P05019, P36888, P35968, P11362, P21802, P06213, P12643 |
| GOTERM_BP_DIRECT | GO:0042593~glucose homeostasis                                              | 7 | 7.87 | 1.5E-05 | P02753, Q96RI1, Q06124, P06213, P37231, P06737, P31749 |
| GOTERM_BP_DIRECT | GO:0050900~leukocyte migration                                              | 7 | 7.87 | 4.3E-05 | P27986, P12931, Q06124, P14780, P14174, P16109, P00734 |
| GOTERM_BP_DIRECT | GO:0018105~peptidyl-serine phosphorylation                                  | 7 | 7.87 | 5E-05   | P12931, O15530, P28482, Q16539, P24941, P31749, P45983 |
| GOTERM_BP_DIRECT | GO:0001934~positive regulation of protein phosphorylation                   | 7 | 7.87 | 5.4E-05 | P35968, P14780, P06213, P00533, P12643, P00734, P31749 |
| GOTERM_BP_DIRECT | GO:0007568~aging                                                            | 7 | 7.87 | 0.00023 | P05164, Q96GD4, P05089, P04818, P04035, P15559, P31749 |
| GOTERM_BP_DIRECT | GO:0007596~blood coagulation                                                | 7 | 7.87 | 0.00041 | P00742, P01009, P08758, P00749, P00747, P00734, P08709 |
| GOTERM_BP_DIRECT | GO:0006809~nitric oxide biosynthetic process                                | 6 | 6.74 | 4.4E-09 | P29474, Q16678, P15559, P35228, P35398, P31749         |
| GOTERM_BP_DIRECT | GO:0045429~positive regulation of nitric oxide biosynthetic process         | 6 | 6.74 | 2.9E-06 | P07900, P03372, P04179, P06213, P00533, P31749         |
| GOTERM_BP_DIRECT | GO:0048661~positive regulation of smooth muscle cell proliferation          | 6 | 6.74 | 1.5E-05 | P08246, P05019, P21802, P04035, P00533, P31749         |
| GOTERM_BP_DIRECT | GO:0014068~positive regulation of phosphatidylinositol 3-kinase signaling   | 6 | 6.74 | 2.3E-05 | P05019, P36888, P35968, P11362, P16109, P00734         |
| GOTERM_BP_DIRECT | GO:0050728~negative regulation of inflammatory response                     | 6 | 6.74 | 5.9E-05 | P08246, P60568, Q13133, Q96RI1, Q07869, P35398         |
| GOTERM_BP_DIRECT | GO:0051897~positive regulation of protein kinase B signaling                | 6 | 6.74 | 7.9E-05 | P00742, P12931, P48736, P06213, P00533, P08709         |
| GOTERM_BP_DIRECT | GO:0032355~response to estradiol                                            | 6 | 6.74 | 0.00011 | P28907, P03372, P09211, P42574, P15559, P08709         |
| GOTERM_BP_DIRECT | GO:0046854~phosphatidylinositol phosphorylation                             | 6 | 6.74 | 0.00013 | P27986, P11362, Q06124, P21802, P48736, P00533         |
| GOTERM_BP_DIRECT | GO:0007169~transmembrane receptor protein tyrosine kinase signaling pathway | 6 | 6.74 | 0.00015 | P36888, P35968, P08581, Q07912, P06213, P00533         |
| GOTERM_BP_DIRECT | GO:0002576~platelet degranulation                                           | 6 | 6.74 | 0.00021 | P05019, P02768, P01009, P16109, P05067, P00747         |

|                  |                                                                    |   |      |         |                                                |
|------------------|--------------------------------------------------------------------|---|------|---------|------------------------------------------------|
| GOTERM_BP_DIRECT | GO:0045471~response to ethanol                                     | 6 | 6.74 | 0.00023 | P60568, P02753, P09211, P04818, P04035, P15559 |
| GOTERM_BP_DIRECT | GO:0000187~activation of MAPK                                      | 6 | 6.74 | 0.00025 | P05019, Q06124, P28482, Q16539, P06213, P12643 |
| GOTERM_BP_DIRECT | GO:0044267~cellular protein metabolic process                      | 6 | 6.74 | 0.00039 | P05019, P08253, P02766, P05067, P00747, P00734 |
| GOTERM_BP_DIRECT | GO:1901796~regulation of signal transduction by p53 class mediator | 6 | 6.74 | 0.00049 | Q00987, Q96GD4, O60285, Q16539, P24941, P31749 |
| GOTERM_BP_DIRECT | GO:0032496~response to lipopolysaccharide                          | 6 | 6.74 | 0.00171 | P05164, P08246, P04179, P42574, P16109, P00797 |
| GOTERM_BP_DIRECT | GO:0007507~heart development                                       | 6 | 6.74 | 0.00275 | P02753, P04179, Q06124, P37231, O07869, P12643 |
| GOTERM_BP_DIRECT | GO:0042127~regulation of cell proliferation                        | 6 | 6.74 | 0.00288 | P12931, O60285, Q07912, P00749, P35228, P15056 |
| GOTERM_BP_DIRECT | GO:0010628~positive regulation of gene expression                  | 6 | 6.74 | 0.0122  | Q00987, Q16539, O75469, P12643, P15056, P45983 |
| GOTERM_BP_DIRECT | GO:0000165~MAPK cascade                                            | 6 | 6.74 | 0.0122  | P60568, P11362, P28482, P21802, P00533, P15056 |
| GOTERM_BP_DIRECT | GO:0007166~cell surface receptor signaling pathway                 | 6 | 6.74 | 0.01457 | P08581, Q07912, P14174, Q16539, P00533, P00734 |
| GOTERM_BP_DIRECT | GO:0006810~transport                                               | 6 | 6.74 | 0.03604 | P02768, P33527, P08183, P02766, O9UNO0, P49638 |
| GOTERM_BP_DIRECT | GO:0006954~inflammatory response                                   | 6 | 6.74 | 0.04891 | Q96RI1, P48736, P14174, P16109, P12643, P31749 |
| GOTERM_BP_DIRECT | GO:0032148~activation of protein kinase B activity                 | 5 | 5.62 | 9.6E-06 | P05019, P12931, O15530, P03950, P06213         |
| GOTERM_BP_DIRECT | GO:0046326~positive regulation of glucose import                   | 5 | 5.62 | 1.7E-05 | P27986, P05019, Q16539, P06213, P31749         |
| GOTERM_BP_DIRECT | GO:0038128~ERBB2 signaling                                         | 5 | 5.62 | 4.5E-05 | P07900, P27986, P12931, P00533, P31749         |
| GOTERM_BP_DIRECT | GO:0030522~intracellular receptor signaling pathway                | 5 | 5.62 | 4.5E-05 | Q13133, Q96RI1, O75469, Q07869, P35398         |
| GOTERM_BP_DIRECT | GO:0036092~phosphatidylinositol-3-phosphate biosynthetic process   | 5 | 5.62 | 0.00012 | P27986, P11362, Q06124, P21802, P48736         |
| GOTERM_BP_DIRECT | GO:0007173~epidermal growth factor receptor signaling pathway      | 5 | 5.62 | 0.00021 | P27986, P12931, O15530, Q06124, P00533         |
| GOTERM_BP_DIRECT | GO:0043627~response to estrogen                                    | 5 | 5.62 | 0.00037 | P07900, P03372, P28482, P37231, P08709         |
| GOTERM_BP_DIRECT | GO:0001938~positive regulation of endothelial cell proliferation   | 5 | 5.62 | 0.00047 | P35968, P05089, P03950, P12643, P31749         |



|                  |                                                                                |   |      |         |                                        |
|------------------|--------------------------------------------------------------------------------|---|------|---------|----------------------------------------|
| GOTERM_BP_DIRECT | GO:0048010~vascular endothelial growth factor receptor signaling               | 5 | 5.62 | 0.00055 | P07900, P27986, P35968, P12931, Q16539 |
| GOTERM_BP_DIRECT | GO:0030324~lung development                                                    | 5 | 5.62 | 0.00068 | P02753, P05089, P29474, P21802, P00533 |
| GOTERM_BP_DIRECT | GO:0022617~extracellular matrix disassembly                                    | 5 | 5.62 | 0.00068 | P08246, P08253, P14780, P00747, P39900 |
| GOTERM_BP_DIRECT | GO:0031295~T cell costimulation                                                | 5 | 5.62 | 0.00075 | P27986, P12931, O15530, Q06124, P31749 |
| GOTERM_BP_DIRECT | GO:0030307~positive regulation of cell growth                                  | 5 | 5.62 | 0.00099 | P28907, P60568, P00533, P00734, P31749 |
| GOTERM_BP_DIRECT | GO:0010629~negative regulation of gene expression                              | 5 | 5.62 | 0.00583 | P03372, P47989, P14174, P35228, P31749 |
| GOTERM_BP_DIRECT | GO:0010887~negative regulation of cholesterol storage                          | 4 | 4.49 | 2.8E-06 | Q13133, P37231, Q07869, P55055         |
| GOTERM_BP_DIRECT | GO:2000188~regulation of cholesterol homeostasis                               | 4 | 4.49 | 1.1E-05 | Q13133, Q96RI1, P35398, P55055         |
| GOTERM_BP_DIRECT | GO:0019430~removal of superoxide radicals                                      | 4 | 4.49 | 3E-05   | P05164, P04179, P29474, P15559         |
| GOTERM_BP_DIRECT | GO:0010745~negative regulation of macrophage derived foam cell differentiation | 4 | 4.49 | 3.8E-05 | Q13133, P37231, Q07869, P55055         |
| GOTERM_BP_DIRECT | GO:0001878~response to yeast                                                   | 4 | 4.49 | 3.8E-05 | P05164, P08246, P03950, P05067         |
| GOTERM_BP_DIRECT | GO:0045861~negative regulation of proteolysis                                  | 4 | 4.49 | 0.00017 | Q13133, P00734, P55055, P31749         |
| GOTERM_BP_DIRECT | GO:0050999~regulation of nitric-oxide synthase activity                        | 4 | 4.49 | 0.00033 | P07900, P29474, P00533, P31749         |
| GOTERM_BP_DIRECT | GO:0040014~regulation of multicellular organism growth                         | 4 | 4.49 | 0.00033 | P05019, Q06124, P21802, P05067         |
| GOTERM_BP_DIRECT | GO:0031663~lipopolysaccharide-mediated signaling                               | 4 | 4.49 | 0.00062 | P29474, P28482, Q16539, P31749         |
| GOTERM_BP_DIRECT | GO:0071364~cellular response to epidermal growth factor stimulus               | 4 | 4.49 | 0.00068 | O15530, P09211, P00533, P31749         |
| GOTERM_BP_DIRECT | GO:0018107~peptidyl-threonine phosphorylation                                  | 4 | 4.49 | 0.00103 | O15530, P28482, P31749, P45983         |
| GOTERM_BP_DIRECT | GO:0038083~peptidyl-tyrosine autophosphorylation                               | 4 | 4.49 | 0.00119 | P35968, P12931, Q07912, P06213         |

|                  |                                                                       |   |      |         |                                |
|------------------|-----------------------------------------------------------------------|---|------|---------|--------------------------------|
| GOTERM_BP_DIRECT | GO:0043124~negative regulation of I-kappaB kinase/NF-kappaB signaling | 4 | 4.49 | 0.00119 | P03372, P09211, Q96RI1, P35398 |
| GOTERM_BP_DIRECT | GO:0008202~steroid metabolic process                                  | 4 | 4.49 | 0.00148 | Q16678, O75469, P11712, Q06520 |
| GOTERM_BP_DIRECT | GO:0031100~organ regeneration                                         | 4 | 4.49 | 0.00191 | P36888, P09211, P37231, P08709 |
| GOTERM_BP_DIRECT | GO:0009408~response to heat                                           | 4 | 4.49 | 0.00203 | P07900, P05019, P29474, P31749 |
| GOTERM_BP_DIRECT | GO:0042752~regulation of circadian rhythm                             | 4 | 4.49 | 0.00215 | Q13133, P37231, Q07869, P45983 |
| GOTERM_BP_DIRECT | GO:0048146~positive regulation of fibroblast proliferation            | 4 | 4.49 | 0.00284 | P05019, P03372, P14174, P00533 |
| GOTERM_BP_DIRECT | GO:0006749~glutathione metabolic process                              | 4 | 4.49 | 0.00315 | P09211, P00390, P04179, Q04760 |
| GOTERM_BP_DIRECT | GO:0071407~cellular response to organic cyclic                        | 4 | 4.49 | 0.00366 | P42574, Q16678, P12643, P31749 |
| GOTERM_BP_DIRECT | GO:0006950~response to stress                                         | 4 | 4.49 | 0.00402 | P07900, P28482, P00533, P45983 |
| GOTERM_BP_DIRECT | GO:0008217~regulation of blood                                        | 4 | 4.49 | 0.00481 | P04179, P29474, P37231, P00797 |
| GOTERM_BP_DIRECT | GO:0035690~cellular response to drug                                  | 4 | 4.49 | 0.00568 | P35228, P00533, P00797, P15056 |
| GOTERM_BP_DIRECT | GO:0030855~epithelial cell                                            | 4 | 4.49 | 0.00591 | P21802, P23141, P37231, Q04828 |
| GOTERM_BP_DIRECT | GO:0007584~response to nutrient                                       | 4 | 4.49 | 0.0069  | P49638, P04035, P37231, P15559 |
| GOTERM_BP_DIRECT | GO:0007623~circadian rhythm                                           | 4 | 4.49 | 0.00716 | P04818, P35228, P00533, P08709 |
| GOTERM_BP_DIRECT | GO:0008286~insulin receptor signaling pathway                         | 4 | 4.49 | 0.00797 | P27986, P06213, P18031, P31749 |
| GOTERM_BP_DIRECT | GO:0008543~fibroblast growth factor receptor signaling pathway        | 4 | 4.49 | 0.00914 | P11362, Q06124, P28482, P21802 |
| GOTERM_BP_DIRECT | GO:0050731~positive regulation of peptidyl-tyrosine phosphorylation   | 4 | 4.49 | 0.00914 | P05019, P12931, Q07912, P14174 |
| GOTERM_BP_DIRECT | GO:0048013~ephrin receptor signaling pathway                          | 4 | 4.49 | 0.01041 | P12931, P08253, Q06124, P14780 |
| GOTERM_BP_DIRECT | GO:0071456~cellular response to                                       | 4 | 4.49 | 0.014   | P12931, Q00987, P35398, P31749 |
| GOTERM_BP_DIRECT | GO:0006979~response to oxidative                                      | 4 | 4.49 | 0.02007 | P05164, P05067, P00533, P31749 |
| GOTERM_BP_DIRECT | GO:0006935~chemotaxis                                                 | 4 | 4.49 | 0.02626 | P15153, P28482, Q16539, P00749 |

|                  |                                                                                  |   |      |         |                                |
|------------------|----------------------------------------------------------------------------------|---|------|---------|--------------------------------|
| GOTERM_BP_DIRECT | GO:0038096~Fc-gamma receptor signaling pathway involved in phagocytosis          | 4 | 4.49 | 0.02911 | P07900, P27986, P12931, P28482 |
| GOTERM_BP_DIRECT | GO:0007204~positive regulation of cytosolic calcium ion concentration            | 4 | 4.49 | 0.03336 | P28907, P60568, P03372, P48736 |
| GOTERM_BP_DIRECT | GO:0001501~skeletal system                                                       | 4 | 4.49 | 0.03528 | P05019, P11362, P14780, P12643 |
| GOTERM_BP_DIRECT | GO:0042742~defense response to bacterium                                         | 4 | 4.49 | 0.04066 | P05164, P08246, Q96RI1, P35228 |
| GOTERM_BP_DIRECT | GO:0060336~negative regulation of interferon-gamma-mediated signaling pathway    | 3 | 3.37 | 0.00027 | Q13133, P37231, P55055         |
| GOTERM_BP_DIRECT | GO:0042908~xenobiotic transport                                                  | 3 | 3.37 | 0.00056 | P08183, Q9UNQ0, O75469         |
| GOTERM_BP_DIRECT | GO:0048762~mesenchymal cell differentiation                                      | 3 | 3.37 | 0.00074 | P11362, P21802, P12643         |
| GOTERM_BP_DIRECT | GO:0006527~arginine catabolic process                                            | 3 | 3.37 | 0.00074 | P05089, P29474, P35228         |
| GOTERM_BP_DIRECT | GO:0010518~positive regulation of phospholipase activity                         | 3 | 3.37 | 0.00074 | O15530, P11362, P21802         |
| GOTERM_BP_DIRECT | GO:0033628~regulation of cell adhesion mediated by integrin                      | 3 | 3.37 | 0.00145 | Q06124, P48736, P00749         |
| GOTERM_BP_DIRECT | GO:0017187~peptidyl-glutamic acid carboxylation                                  | 3 | 3.37 | 0.00145 | P00742, P00734, P08709         |
| GOTERM_BP_DIRECT | GO:2001275~positive regulation of glucose import in response to insulin stimulus | 3 | 3.37 | 0.00204 | P27986, Q96RI1, Q06124         |
| GOTERM_BP_DIRECT | GO:0060065~uterus development                                                    | 3 | 3.37 | 0.00237 | P03372, P02753, P12931         |
| GOTERM_BP_DIRECT | GO:0048009~insulin-like growth factor receptor signaling pathway                 | 3 | 3.37 | 0.00237 | P27986, P05019, P31749         |
| GOTERM_BP_DIRECT | GO:0043254~regulation of protein complex assembly                                | 3 | 3.37 | 0.00237 | P07900, P11142, Q06124         |
| GOTERM_BP_DIRECT | GO:0032270~positive regulation of cellular protein metabolic process             | 3 | 3.37 | 0.00273 | Q13133, P55055, P31749         |

|                  |                                                                             |   |      |         |                        |
|------------------|-----------------------------------------------------------------------------|---|------|---------|------------------------|
| GOTERM_BP_DIRECT | GO:1904707~positive regulation of vascular smooth muscle cell proliferation | 3 | 3.37 | 0.00273 | Q00987, P08253, P14780 |
| GOTERM_BP_DIRECT | GO:0045725~positive regulation of glycogen biosynthetic process             | 3 | 3.37 | 0.00273 | P05019, P06213, P31749 |
| GOTERM_BP_DIRECT | GO:0048011~neurotrophin TRK receptor signaling                              | 3 | 3.37 | 0.00311 | P12931, Q06124, P42574 |
| GOTERM_BP_DIRECT | GO:0033189~response to vitamin A                                            | 3 | 3.37 | 0.00393 | P05089, P04818, P37231 |
| GOTERM_BP_DIRECT | GO:1900182~positive regulation of protein localization to nucleus           | 3 | 3.37 | 0.00534 | P12931, P00734, P31749 |
| GOTERM_BP_DIRECT | GO:0035902~response to immobilization                                       | 3 | 3.37 | 0.00534 | P04179, P37231, P00797 |
| GOTERM_BP_DIRECT | GO:0042730~fibrinolysis                                                     | 3 | 3.37 | 0.00534 | P00749, P00747, P00734 |
| GOTERM_BP_DIRECT | GO:0051000~positive regulation of nitric-oxide synthase activity            | 3 | 3.37 | 0.00586 | P03372, P31749, P00374 |
| GOTERM_BP_DIRECT | GO:0060045~positive regulation of cardiac muscle cell proliferation         | 3 | 3.37 | 0.00586 | P11362, P21802, Q16539 |
| GOTERM_BP_DIRECT | GO:0035924~cellular response to vascular endothelial growth factor stimulus | 3 | 3.37 | 0.0064  | P35968, Q16539, P31749 |
| GOTERM_BP_DIRECT | GO:0051090~regulation of sequence-specific DNA binding transcription factor | 3 | 3.37 | 0.00753 | P28482, Q16539, P45983 |
| GOTERM_BP_DIRECT | GO:0006465~signal peptide processing                                        | 3 | 3.37 | 0.00753 | P00742, P00734, P08709 |
| GOTERM_BP_DIRECT | GO:0042327~positive regulation of phosphorylation                           | 3 | 3.37 | 0.00753 | P03950, P14174, P00533 |
| GOTERM_BP_DIRECT | GO:0015721~bile acid and bile salt transport                                | 3 | 3.37 | 0.00875 | P02768, Q96RI1, Q04828 |
| GOTERM_BP_DIRECT | GO:0014065~phosphatidylinositol 3-kinase signaling                          | 3 | 3.37 | 0.00875 | P27986, P05019, P48736 |
| GOTERM_BP_DIRECT | GO:0045931~positive regulation of mitotic cell cycle                        | 3 | 3.37 | 0.00939 | Q00987, Q06124, P05067 |
| GOTERM_BP_DIRECT | GO:0045909~positive regulation of vasodilation                              | 3 | 3.37 | 0.01006 | P29474, P35228, P00533 |

|                  |                                                                                            |   |      |         |                        |
|------------------|--------------------------------------------------------------------------------------------|---|------|---------|------------------------|
| GOTERM_BP_DIRECT | GO:2000379~positive regulation of reactive oxygen species metabolic process                | 3 | 3.37 | 0.01074 | P47989, Q16539, P00734 |
| GOTERM_BP_DIRECT | GO:0045776~negative regulation of blood pressure                                           | 3 | 3.37 | 0.01074 | P29474, P35228, Q07869 |
| GOTERM_BP_DIRECT | GO:0042572~retinol metabolic process                                                       | 3 | 3.37 | 0.01074 | P02753, P02766, Q16678 |
| GOTERM_BP_DIRECT | GO:0090004~positive regulation of establishment of protein localization to plasma membrane | 3 | 3.37 | 0.01074 | P27986, O15530, P31749 |
| GOTERM_BP_DIRECT | GO:0043200~response to amino acid                                                          | 3 | 3.37 | 0.01144 | P09211, P05089, P42574 |
| GOTERM_BP_DIRECT | GO:0046677~response to antibiotic                                                          | 3 | 3.37 | 0.01216 | P07900, Q00987, P42574 |
| GOTERM_BP_DIRECT | GO:0045907~positive regulation of vasoconstriction                                         | 3 | 3.37 | 0.01216 | P28907, P00533, P31749 |
| GOTERM_BP_DIRECT | GO:0001890~placenta development                                                            | 3 | 3.37 | 0.01444 | P03950, Q16539, P37231 |
| GOTERM_BP_DIRECT | GO:0031648~protein destabilization                                                         | 3 | 3.37 | 0.01444 | P12931, Q00987, P12643 |
| GOTERM_BP_DIRECT | GO:0009409~response to cold                                                                | 3 | 3.37 | 0.01524 | P07900, P04179, P37231 |
| GOTERM_BP_DIRECT | GO:0043407~negative regulation of MAP kinase activity                                      | 3 | 3.37 | 0.01524 | P09211, P04035, P18031 |
| GOTERM_BP_DIRECT | GO:0050714~positive regulation of protein secretion                                        | 3 | 3.37 | 0.01524 | P05019, P03950, P22303 |
| GOTERM_BP_DIRECT | GO:0048469~cell maturation                                                                 | 3 | 3.37 | 0.01524 | P11362, P37231, P00797 |
| GOTERM_BP_DIRECT | GO:2001237~negative regulation of extrinsic apoptotic signaling pathway                    | 3 | 3.37 | 0.01689 | P05019, P12931, P09211 |
| GOTERM_BP_DIRECT | GO:0000302~response to reactive oxygen species                                             | 3 | 3.37 | 0.01774 | P09211, P00390, P04179 |
| GOTERM_BP_DIRECT | GO:0030890~positive regulation of B cell proliferation                                     | 3 | 3.37 | 0.01774 | P28907, P60568, P14174 |
| GOTERM_BP_DIRECT | GO:0002062~chondrocyte                                                                     | 3 | 3.37 | 0.01774 | P11362, Q16539, P12643 |
| GOTERM_BP_DIRECT | GO:0032570~response to progesterone                                                        | 3 | 3.37 | 0.01774 | P28907, Q13133, P04818 |
| GOTERM_BP_DIRECT | GO:0030163~protein catabolic process                                                       | 3 | 3.37 | 0.0195  | P08246, P31749, P00797 |
| GOTERM_BP_DIRECT | GO:0044255~cellular lipid metabolic process                                                | 3 | 3.37 | 0.0195  | Q13133, Q07869, P55055 |
| GOTERM_BP_DIRECT | GO:0032526~response to retinoic acid                                                       | 3 | 3.37 | 0.0195  | P28907, P02753, P37231 |

|                  |                                                                                                             |   |      |         |                        |
|------------------|-------------------------------------------------------------------------------------------------------------|---|------|---------|------------------------|
| GOTERM_BP_DIRECT | GO:0045740~positive regulation of DNA replication                                                           | 3 | 3.37 | 0.02041 | P05019, P06213, P00533 |
| GOTERM_BP_DIRECT | GO:0008542~visual learning                                                                                  | 3 | 3.37 | 0.02323 | P04035, P05067, P15056 |
| GOTERM_BP_DIRECT | GO:0045165~cell fate commitment                                                                             | 3 | 3.37 | 0.02421 | P21802, P37231, P12643 |
| GOTERM_BP_DIRECT | GO:0045600~positive regulation of fat cell differentiation                                                  | 3 | 3.37 | 0.0252  | P37231, P12643, P31749 |
| GOTERM_BP_DIRECT | GO:0042542~response to hydrogen peroxide                                                                    | 3 | 3.37 | 0.02932 | P12931, P04179, P42574 |
| GOTERM_BP_DIRECT | GO:0006417~regulation of translation                                                                        | 3 | 3.37 | 0.03039 | P04818, P05067, P31749 |
| GOTERM_BP_DIRECT | GO:0050829~defense response to Gram-negative                                                                | 3 | 3.37 | 0.0337  | P16109, P05067, P35228 |
| GOTERM_BP_DIRECT | GO:0070301~cellular response to hydrogen peroxide                                                           | 3 | 3.37 | 0.03598 | Q00987, P05089, Q16678 |
| GOTERM_BP_DIRECT | GO:0032091~negative regulation of protein binding                                                           | 3 | 3.37 | 0.03598 | Q96GD4, Q07869, P45983 |
| GOTERM_BP_DIRECT | GO:0009612~response to mechanical stimulus                                                                  | 3 | 3.37 | 0.03831 | P05164, P12931, P37231 |
| GOTERM_BP_DIRECT | GO:0050679~positive regulation of epithelial cell proliferation                                             | 3 | 3.37 | 0.0395  | P05019, P21802, P00533 |
| GOTERM_BP_DIRECT | GO:0001523~retinoid metabolic process                                                                       | 3 | 3.37 | 0.0407  | P02753, P02766, Q04828 |
| GOTERM_BP_DIRECT | GO:0030574~collagen catabolic process                                                                       | 3 | 3.37 | 0.04439 | P08253, P14780, P39900 |
| GOTERM_BP_DIRECT | GO:0042632~cholesterol homeostasis                                                                          | 3 | 3.37 | 0.04439 | Q13133, Q04828, P55055 |
| GOTERM_BP_DIRECT | GO:0051384~response to                                                                                      | 3 | 3.37 | 0.04565 | P04818, P42574, P06276 |
| GOTERM_BP_DIRECT | GO:0035607~fibroblast growth factor receptor signaling pathway involved in orbitofrontal cortex development | 2 | 2.25 | 0.01045 | P11362, P21802         |
| GOTERM_BP_DIRECT | GO:0070141~response to UV-A                                                                                 | 2 | 2.25 | 0.01564 | P00533, P31749         |
| GOTERM_BP_DIRECT | GO:0010871~negative regulation of receptor biosynthetic process                                             | 2 | 2.25 | 0.01564 | P37231, Q07869         |
| GOTERM_BP_DIRECT | GO:0002679~respiratory burst involved in defense response                                                   | 2 | 2.25 | 0.01564 | P05164, P48736         |
| GOTERM_BP_DIRECT | GO:0021847~ventricular zone neuroblast division                                                             | 2 | 2.25 | 0.01564 | P11362, P21802         |

|                  |                                                                                             |   |      |         |                |
|------------------|---------------------------------------------------------------------------------------------|---|------|---------|----------------|
| GOTERM_BP_DIRECT | GO:0010641~positive regulation of platelet-derived growth factor receptor signaling pathway | 2 | 2.25 | 0.01564 | P12931, P08709 |
| GOTERM_BP_DIRECT | GO:0031281~positive regulation of cyclase activity                                          | 2 | 2.25 | 0.01564 | Q16539, P45983 |
| GOTERM_BP_DIRECT | GO:0061684~chaperone-mediated autophagy                                                     | 2 | 2.25 | 0.01564 | P07900, P11142 |
| GOTERM_BP_DIRECT | GO:0060523~prostate epithelial cord elongation                                              | 2 | 2.25 | 0.01564 | P03372, P21802 |
| GOTERM_BP_DIRECT | GO:0032376~positive regulation of cholesterol transport                                     | 2 | 2.25 | 0.0208  | Q13133, P55055 |
| GOTERM_BP_DIRECT | GO:0046683~response to organophosphorus                                                     | 2 | 2.25 | 0.0208  | P04818, Q04828 |
| GOTERM_BP_DIRECT | GO:0032369~negative regulation of lipid transport                                           | 2 | 2.25 | 0.0208  | Q13133, P55055 |
| GOTERM_BP_DIRECT | GO:0038127~ERBB signaling pathway                                                           | 2 | 2.25 | 0.0208  | Q06124, P28482 |
| GOTERM_BP_DIRECT | GO:0048550~negative regulation of pinocytosis                                               | 2 | 2.25 | 0.0208  | Q13133, P55055 |
| GOTERM_BP_DIRECT | GO:1900015~regulation of cytokine production involved in inflammatory response              | 2 | 2.25 | 0.0208  | Q16539, P35228 |
| GOTERM_BP_DIRECT | GO:0060850~regulation of transcription involved in cell fate commitment                     | 2 | 2.25 | 0.02593 | P37231, P35398 |
| GOTERM_BP_DIRECT | GO:0010891~negative regulation of sequestering of triglyceride                              | 2 | 2.25 | 0.02593 | P37231, Q07869 |
| GOTERM_BP_DIRECT | GO:0035630~bone mineralization involved in bone maturation                                  | 2 | 2.25 | 0.02593 | P05019, P12643 |
| GOTERM_BP_DIRECT | GO:0048562~embryonic organ morphogenesis                                                    | 2 | 2.25 | 0.02593 | P02753, P21802 |
| GOTERM_BP_DIRECT | GO:0008088~axo-dendritic transport                                                          | 2 | 2.25 | 0.02593 | P10636, P05067 |
| GOTERM_BP_DIRECT | GO:0033591~response to L-ascorbic                                                           | 2 | 2.25 | 0.02593 | P09211, P04179 |
| GOTERM_BP_DIRECT | GO:0007598~blood coagulation, extrinsic pathway                                             | 2 | 2.25 | 0.02593 | P00742, P08709 |
| GOTERM_BP_DIRECT | GO:0010042~response to manganese                                                            | 2 | 2.25 | 0.03104 | P05089, P04179 |

|                  |                                                                                                      |   |      |         |                |
|------------------|------------------------------------------------------------------------------------------------------|---|------|---------|----------------|
| GOTERM_BP_DIRECT | GO:0060527~prostate epithelial cord arborization involved in prostate glandular acinus morphogenesis | 2 | 2.25 | 0.03104 | P03372, P21802 |
| GOTERM_BP_DIRECT | GO:0071638~negative regulation of monocyte chemotactic protein-1 production                          | 2 | 2.25 | 0.03104 | P09211, Q96RI1 |
| GOTERM_BP_DIRECT | GO:0046321~positive regulation of fatty acid oxidation                                               | 2 | 2.25 | 0.03104 | P37231, Q07869 |
| GOTERM_BP_DIRECT | GO:0035726~common myeloid progenitor cell                                                            | 2 | 2.25 | 0.03612 | P36888, P09211 |
| GOTERM_BP_DIRECT | GO:0002318~myeloid progenitor cell differentiation                                                   | 2 | 2.25 | 0.03612 | P36888, P15056 |
| GOTERM_BP_DIRECT | GO:0051593~response to folic acid                                                                    | 2 | 2.25 | 0.03612 | P04818, P06276 |
| GOTERM_BP_DIRECT | GO:0060687~regulation of branching involved in prostate gland                                        | 2 | 2.25 | 0.03612 | P03372, P21802 |
| GOTERM_BP_DIRECT | GO:0097011~cellular response to granulocyte macrophage colony-stimulating factor stimulus            | 2 | 2.25 | 0.04117 | P28482, P31749 |
| GOTERM_BP_DIRECT | GO:0033629~negative regulation of cell adhesion mediated by integrin                                 | 2 | 2.25 | 0.04117 | Q06124, Q16678 |
| GOTERM_BP_DIRECT | GO:0002674~negative regulation of acute inflammatory response                                        | 2 | 2.25 | 0.04117 | P09211, P37231 |
| GOTERM_BP_DIRECT | GO:0010544~negative regulation of platelet activation                                                | 2 | 2.25 | 0.04117 | P29474, P00734 |
| GOTERM_BP_DIRECT | GO:0010269~response to selenium ion                                                                  | 2 | 2.25 | 0.04117 | P05089, P04179 |
| GOTERM_BP_DIRECT | GO:0032872~regulation of stress-activated MAPK cascade                                               | 2 | 2.25 | 0.04117 | P09211, P28482 |
| GOTERM_BP_DIRECT | GO:0043304~regulation of mast cell degranulation                                                     | 2 | 2.25 | 0.04117 | O15530, P15153 |
| GOTERM_BP_DIRECT | GO:0002903~negative regulation of B cell apoptotic                                                   | 2 | 2.25 | 0.04117 | P60568, Q96GD4 |



|                  |                                                                                                                                               |    |       |          |                                                                                                                                                                                                                                                                                                                 |
|------------------|-----------------------------------------------------------------------------------------------------------------------------------------------|----|-------|----------|-----------------------------------------------------------------------------------------------------------------------------------------------------------------------------------------------------------------------------------------------------------------------------------------------------------------|
| GOTERM_BP_DIRECT | GO:0051659~positive regulation of cyclin-dependent protein serine/threonine kinase activity involved in G1/S transition of mitotic cell cycle | 2  | 2.25  | 0.04117  | P00533, P31749                                                                                                                                                                                                                                                                                                  |
| GOTERM_BP_DIRECT | GO:2000641~regulation of early endosome to late endosome transport                                                                            | 2  | 2.25  | 0.04117  | P12931, P28482                                                                                                                                                                                                                                                                                                  |
| GOTERM_BP_DIRECT | GO:0043030~regulation of macrophage activation                                                                                                | 2  | 2.25  | 0.0462   | P14174, P35398                                                                                                                                                                                                                                                                                                  |
| GOTERM_BP_DIRECT | GO:0034405~response to fluid shear stress                                                                                                     | 2  | 2.25  | 0.0462   | P29474, P31749                                                                                                                                                                                                                                                                                                  |
| GOTERM_BP_DIRECT | GO:0060020~Bergmann glial cell differentiation                                                                                                | 2  | 2.25  | 0.0462   | Q06124, P28482                                                                                                                                                                                                                                                                                                  |
| GOTERM_BP_DIRECT | GO:0010907~positive regulation of glucose metabolic process                                                                                   | 2  | 2.25  | 0.0462   | P12931, P31749                                                                                                                                                                                                                                                                                                  |
| GOTERM_BP_DIRECT | GO:0060068~vaginal development                                                                                                                | 2  | 2.25  | 0.0462   | P03372, P02753                                                                                                                                                                                                                                                                                                  |
| GOTERM_BP_DIRECT | GO:0097267~omega-hydroxylase P450 pathway                                                                                                     | 2  | 2.25  | 0.0462   | Q16678, P11712                                                                                                                                                                                                                                                                                                  |
| GOTERM_BP_DIRECT | GO:0010863~positive regulation of phospholipase C activity                                                                                    | 2  | 2.25  | 0.0462   | P03372, P11362                                                                                                                                                                                                                                                                                                  |
| GOTERM_BP_DIRECT | GO:0042473~outer ear morphogenesis                                                                                                            | 2  | 2.25  | 0.0462   | P11362, P28482                                                                                                                                                                                                                                                                                                  |
| GOTERM_BP_DIRECT | GO:0032930~positive regulation of superoxide anion generation                                                                                 | 2  | 2.25  | 0.0462   | P09211, P00533                                                                                                                                                                                                                                                                                                  |
| GOTERM_CC_DIRECT | GO:0005829~cytosol                                                                                                                            | 42 | 47.19 | 9.11E-10 | P09917, P02753, P12931, P11362, P48736, P35228, P06737, Q06520, P07900, P30043, P11142, P27986, Q00987, O15530, P15153, Q96GD4, P29474, Q06124, P28482, P37231, P15559, Q04828, P15056, P00374, P10636, P36888, P47989, P05089, P00390, Q04760, P23141, P49638, P05067, P24941, P18031, O15746, P09211, P04818, |

|                  |                                  |    |       |          |                                                                                                                                                                                                                                                                                                                         |
|------------------|----------------------------------|----|-------|----------|-------------------------------------------------------------------------------------------------------------------------------------------------------------------------------------------------------------------------------------------------------------------------------------------------------------------------|
| GOTERM_CC_DIRECT | GO:0005634~nucleus               | 42 | 47.19 | 6.00E-04 | P12931, P11362, P35228, P09874, P05164, P07900, P11142, P27986, Q00987, Q96GD4, P29474, Q06124, Q96RI1, P28482, P21802, Q9UNQ0, P22303, P37231, Q07869, P55055, P15056, Q13133, P36888, P02768, P05089, O60285, O75469, P24941, P35398, P28907, P03372, P35968, P09211, P08253, P04818, P03950, Q07912, P42574,         |
| GOTERM_CC_DIRECT | GO:0005886~plasma membrane       | 41 | 46.07 | 1.75E-06 | P05019, P12931, P11362, P08581, P48736, P06737, P00797, P07900, P30043, P11142, P27986, Q00987, O15530, P15153, P29474, P21802, Q9UNQ0, P22303, P16109, P06213, P00734, P15056, P10636, P36888, P05067, P18031, P28907, P00742, P03372, P35968, P33527, P09211, P08183, P08253, Q07912, P42574, P00749, P00533, P00747, |
| GOTERM_CC_DIRECT | GO:0005737~cytoplasm             | 38 | 42.70 | 0.00483  | P12931, P48736, P14174, P35228, P06737, Q06520, P08246, P07900, P30043, P27986, Q00987, O15530, P15153, P29474, Q06124, P28482, P21802, P16109, P08758, P15559, P55055, P15056, P10636, P05089, P02766, Q04760, O60285, P05067, P24941, P03372, Q15746, P09211, P04818, Q07912, P42574, Q16539,                         |
| GOTERM_CC_DIRECT | GO:0070062~extracellular exosome | 34 | 38.20 | 3.55E-07 | P02753, P12931, P14780, P14174, P06737, P05164, P08246, P07900, P11142, P30043, P15153, P01009, P28482, P06213, P15559, P08758, P00734, Q04828, P02768, P00390, P05089, P02766, Q04760, P05067, P28907, Q15746, P33527, P09211, P08183, P04179, P03950, P00749,                                                         |
| GOTERM_CC_DIRECT | GO:0005615~extracellular space   | 28 | 31.46 | 9.08E-11 | P05019, P09917, P02753, P14174, P14780, P00797, P05164, P08246, P11142, P01009, P16109, P22303, P12643, P00734, P47989, P02768, P05089, P02766, P23141, P05067, P60568, P09211, P08253, P03950,                                                                                                                         |
| GOTERM_CC_DIRECT | GO:0005576~extracellular region  | 27 | 30.34 | 2.16E-08 | P05019, P02753, P11362, P08581, P14174, P14780, P00797, P08246, P07900, P21802, P01009, P22303, P12643, P00734, P02768, P02766, P05067, P39900, P60568, P00742, P35968, P08253, P03950, P00749,                                                                                                                         |

|                  |                                                  |    |       |          |                                                                                                                                                                                 |
|------------------|--------------------------------------------------|----|-------|----------|---------------------------------------------------------------------------------------------------------------------------------------------------------------------------------|
| GOTERM_CC_DIRECT | GO:0005654~nucleoplasm                           | 27 | 30.34 | 4.94E-04 | P14174, P09874, P11142, P30043, P07900, O15530, Q00987, Q96GD4, Q96RI1, P21802, P28482, P16109, P37231, Q07869, P55055, P00374, Q13133, O60285, O75469, P24941, P35398, P03372, |
| GOTERM_CC_DIRECT | GO:0016020~membrane                              | 19 | 21.35 | 0.0167   | P48736, P09874, P28907, P07900, P03372, P11142, P27986, O15530, P15153, P33527, P08183, P21802, Q07912, P16109, P22303, P06213, P08758, P00533, P06276,                         |
| GOTERM_CC_DIRECT | GO:0005739~mitochondrion                         | 16 | 17.98 | 0.00167  | P12931, P00390, P09874, P05164, P09211, P04179, P08253, Q06124, P04818, P28482, P21397, Q16678, O16530, P31740, P45082, P15056,                                                 |
| GOTERM_CC_DIRECT | GO:0009986~cell surface                          | 13 | 14.61 | 1.11E-05 | P08581, P14174, P05067, P28907, P08246, P07900, P08183, P21802, P22303, P00749, P00533, P00747, P12642,                                                                         |
| GOTERM_CC_DIRECT | GO:0043234~protein complex                       | 10 | 11.24 | 1.67E-04 | P07900, P36888, P02753, Q00987, P02768, P02766, Q06124, P28482, P09874, P31749,                                                                                                 |
| GOTERM_CC_DIRECT | GO:0005788~endoplasmic reticulum lumen           | 7  | 7.87  | 3.35E-04 | P00742, P36888, P01009, P23141, P06276, P00734, P08709                                                                                                                          |
| GOTERM_CC_DIRECT | GO:0005925~focal adhesion                        | 7  | 7.87  | 0.01164  | P11142, O15530, P15153, P28482, P08758, P00749, P00533                                                                                                                          |
| GOTERM_CC_DIRECT | GO:0031093~platelet alpha granule                | 5  | 5.62  | 1.43E-04 | P05019, P02768, P01009, P05067, P00747                                                                                                                                          |
| GOTERM_CC_DIRECT | GO:0043235~receptor complex                      | 5  | 5.62  | 0.00334  | Q13133, P11362, P05067, P06213, P00533                                                                                                                                          |
| GOTERM_CC_DIRECT | GO:0016023~cytoplasmic, membrane-bounded vesicle | 5  | 5.62  | 0.00449  | P35968, O15530, P11362, P21802, P03950                                                                                                                                          |
| GOTERM_CC_DIRECT | GO:0072562~blood microparticle                   | 5  | 5.62  | 0.00631  | P11142, P02768, P06276, P00747, P00734                                                                                                                                          |
| GOTERM_CC_DIRECT | GO:0043209~myelin sheath                         | 5  | 5.62  | 0.00631  | P07900, P11142, P02768, P04179, P14174                                                                                                                                          |
| GOTERM_CC_DIRECT | GO:0005768~endosome                              | 5  | 5.62  | 0.02357  | P35968, Q07912, P05067, P24941, P00533                                                                                                                                          |
| GOTERM_CC_DIRECT | GO:0005901~caveola                               | 4  | 4.49  | 0.00383  | P12931, P29474, P28482, P06213                                                                                                                                                  |
| GOTERM_CC_DIRECT | GO:0005770~late endosome                         | 4  | 4.49  | 0.02127  | P11142, P12931, P28482, P49638                                                                                                                                                  |
| GOTERM_CC_DIRECT | GO:0031982~vesicle                               | 4  | 4.49  | 0.0241   | P09211, P14174, P08709, P31749                                                                                                                                                  |
| GOTERM_CC_DIRECT | GO:0005641~nuclear envelope lumen                | 3  | 3.37  | 6.33E-04 | P09917, P05067, P06276                                                                                                                                                          |
| GOTERM_CC_DIRECT | GO:0097443~sorting endosome                      | 2  | 2.25  | 0.01918  | P35968, P18031                                                                                                                                                                  |

|                  |                                                     |    |       |         |                                                                                                                                                                                                                                                                                                                                                                                                                                                                                                                 |
|------------------|-----------------------------------------------------|----|-------|---------|-----------------------------------------------------------------------------------------------------------------------------------------------------------------------------------------------------------------------------------------------------------------------------------------------------------------------------------------------------------------------------------------------------------------------------------------------------------------------------------------------------------------|
| GOTERM_MF_DIRECT | GO:0005515~protein binding                          | 69 | 77.53 | 8.9E-07 | P05019, P12931, P48736, P14780, P14174, P06737, P11142, P27986, O15530, Q00987, Q9UNQ0, P08758, P15559, P06213, Q07869, P00734, P55055, Q04828, P15056, O60285, O75469, P04035, P35398, P00742, P35968, P09211, Q07912, P00749, Q16539, P00747, P45983, P09917, P02753, P11362, P08581, P35228, P09874, Q06520, P08246, P07900, Q96GD4, P29474, Q96RI1, Q06124, P01009, P28482, P21802, P16109, P22303, P37231, P12643, P10636, Q13133, P36888, P02768, P02766, P49638, P24941, P05067, P18031, P03372, Q15746, |
| GOTERM_MF_DIRECT | GO:0005524~ATP binding                              | 26 | 29.21 | 9.8E-08 | P12931, P11362, P08581, P48736, P06737, P11142, P07900, O15530, Q96GD4, P21802, Q9UNQ0, P28482, P06213, P15056, P36888, O60285, P24941, P35968, Q15746, P33527, P08183, Q07912, Q16539,                                                                                                                                                                                                                                                                                                                         |
| GOTERM_MF_DIRECT | GO:0042802~identical protein binding                | 19 | 21.35 | 4.7E-08 | P02768, P11362, P02766, P14780, P05067, P09874, P03372, P07900, Q00987, P04179, P01009, P28482, Q07912, P15559, P37231, P00533, P06276, P21740, P15056,                                                                                                                                                                                                                                                                                                                                                         |
| GOTERM_MF_DIRECT | GO:0008270~zinc ion binding                         | 15 | 16.85 | 0.00279 | Q13133, Q04760, P14780, O75469, P09874, P35398, P18031, P39900, P03372, Q00987, Q96RI1, P08253, P37231, Q07860, P55055,                                                                                                                                                                                                                                                                                                                                                                                         |
| GOTERM_MF_DIRECT | GO:0019899~enzyme binding                           | 14 | 15.73 | 1.7E-08 | P10636, P12931, P05067, P09874, P18031, P03372, P11142, Q00987, P37231, Q16539, P00533, P06276, P21740, P45082,                                                                                                                                                                                                                                                                                                                                                                                                 |
| GOTERM_MF_DIRECT | GO:0016301~kinase activity                          | 13 | 14.61 | 4.3E-09 | P27986, Q15746, O15530, P12931, P28482, P21802, P48736, Q07912, P00749, P24941, P31749, P15056, P45082,                                                                                                                                                                                                                                                                                                                                                                                                         |
| GOTERM_MF_DIRECT | GO:0004672~protein kinase activity                  | 12 | 13.48 | 2.6E-06 | P12931, O15530, Q96GD4, P08581, P48736, O60285, Q07912, Q16539, P24941, P00533, P31749,                                                                                                                                                                                                                                                                                                                                                                                                                         |
| GOTERM_MF_DIRECT | GO:0042803~protein homodimerization activity        | 12 | 13.48 | 0.00141 | P07900, P36888, P47989, P11362, P04818, P21802, Q9UNQ0, P03950, P22303, P04035, P35228,                                                                                                                                                                                                                                                                                                                                                                                                                         |
| GOTERM_MF_DIRECT | GO:0004674~protein serine/threonine kinase activity | 11 | 12.36 | 2.6E-05 | O15530, Q96GD4, P28482, P48736, O60285, Q07912, Q16539, P24941, P31749, P15056, P45983,                                                                                                                                                                                                                                                                                                                                                                                                                         |
| GOTERM_MF_DIRECT | GO:0005102~receptor binding                         | 10 | 11.24 | 9.2E-05 | P12931, P03950, P14174, P05067, P35228, P00747, P12643, P00734, P08709, P00797,                                                                                                                                                                                                                                                                                                                                                                                                                                 |
| GOTERM_MF_DIRECT | GO:0008144~drug binding                             | 9  | 10.11 | 5.6E-09 | P09211, P02768, P04818, O75469, P37231, P06737, P11712, Q07869, P00374,                                                                                                                                                                                                                                                                                                                                                                                                                                         |

|                  |                                                                                                                          |   |       |         |                                                                        |
|------------------|--------------------------------------------------------------------------------------------------------------------------|---|-------|---------|------------------------------------------------------------------------|
| GOTERM_MF_DIRECT | GO:0004713~protein tyrosine kinase activity                                                                              | 9 | 10.11 | 4.6E-07 | P07900, P35968, P12931, P11362, P08581, P21802, Q07912, P06213, P00533 |
| GOTERM_MF_DIRECT | GO:0004252~serine-type endopeptidase activity                                                                            | 9 | 10.11 | 5.5E-05 | P08246, P00742, P08253, P14780, P00749, P00747, P00734, P39900, P08709 |
| GOTERM_MF_DIRECT | GO:0004879~RNA polymerase II transcription factor activity, ligand-activated sequence-specific DNA binding               | 8 | 8.99  | 6.1E-10 | Q13133, P03372, Q96RI1, O75469, P37231, Q07869, P35398, P55055         |
| GOTERM_MF_DIRECT | GO:0003707~steroid hormone receptor activity                                                                             | 8 | 8.99  | 1.6E-08 | Q13133, P03372, Q96RI1, O75469, P37231, Q07869, P35398, P55055         |
| GOTERM_MF_DIRECT | GO:0043565~sequence-specific DNA binding                                                                                 | 8 | 8.99  | 0.01846 | Q13133, P03372, Q96RI1, O75469, P37231, Q07869, P35398, P55055         |
| GOTERM_MF_DIRECT | GO:0008201~heparin binding                                                                                               | 7 | 7.87  | 0.00019 | P05164, P08246, P11362, P21802, P03950, P16109, P05067                 |
| GOTERM_MF_DIRECT | GO:0008134~transcription factor                                                                                          | 7 | 7.87  | 0.00368 | P27986, P03372, P28482, P37231, P09874, Q07869, P35398                 |
| GOTERM_MF_DIRECT | GO:0005158~insulin receptor binding                                                                                      | 6 | 6.74  | 5.2E-07 | P27986, P05019, P12931, O15530, O06124, P18031                         |
| GOTERM_MF_DIRECT | GO:0004714~transmembrane receptor protein tyrosine kinase activity                                                       | 6 | 6.74  | 1.5E-06 | P36888, P35968, P08581, P21802, P06213, P00533                         |
| GOTERM_MF_DIRECT | GO:0046934~phosphatidylinositol-4,5-bisphosphate 3-kinase activity                                                       | 6 | 6.74  | 1.8E-05 | P27986, P11362, Q06124, P21802, P48736, P00533                         |
| GOTERM_MF_DIRECT | GO:0019903~protein phosphatase                                                                                           | 6 | 6.74  | 1.9E-05 | P07900, P27986, P08581, Q16539, P37231, P00533                         |
| GOTERM_MF_DIRECT | GO:0020037~heme binding                                                                                                  | 6 | 6.74  | 0.00075 | P05164, P12931, P29474, Q16678, P35228, P11712                         |
| GOTERM_MF_DIRECT | GO:0050661~NADP binding                                                                                                  | 5 | 5.62  | 3.2E-05 | P00390, P29474, P04035, P35228, P00374                                 |
| GOTERM_MF_DIRECT | GO:0016303~1-phosphatidylinositol-3-kinase activity                                                                      | 5 | 5.62  | 7.3E-05 | P27986, P11362, Q06124, P21802, P48736                                 |
| GOTERM_MF_DIRECT | GO:0001948~glycoprotein binding                                                                                          | 5 | 5.62  | 0.00037 | P07900, P01009, P16109, P00533, P08709                                 |
| GOTERM_MF_DIRECT | GO:0005506~iron ion binding                                                                                              | 5 | 5.62  | 0.0084  | P09917, P47989, P29474, Q16678, P11712                                 |
| GOTERM_MF_DIRECT | GO:0016491~oxidoreductase activity                                                                                       | 5 | 5.62  | 0.0206  | P00390, P29474, P21397, P11712, O04828                                 |
| GOTERM_MF_DIRECT | GO:0005215~transporter activity                                                                                          | 5 | 5.62  | 0.02128 | P02753, P33527, P08183, O9UNO0, P49638                                 |
| GOTERM_MF_DIRECT | GO:0001077~transcriptional activator activity, RNA polymerase II core promoter proximal region sequence-specific binding | 5 | 5.62  | 0.03491 | Q13133, P03372, Q96RI1, Q07869, P55055                                 |

|                  |                                                                             |   |      |         |                                |
|------------------|-----------------------------------------------------------------------------|---|------|---------|--------------------------------|
| GOTERM_MF_DIRECT | GO:0030235~nitric-oxide synthase regulator activity                         | 4 | 4.49 | 7.5E-06 | P07900, P03372, P00533, P31749 |
| GOTERM_MF_DIRECT | GO:0005159~insulin-like growth factor receptor binding                      | 4 | 4.49 | 6E-05   | P27986, P05019, P06213, P00797 |
| GOTERM_MF_DIRECT | GO:0019825~oxygen binding                                                   | 4 | 4.49 | 0.00188 | P02768, P04179, Q16678, P11712 |
| GOTERM_MF_DIRECT | GO:0050660~flavin adenine dinucleotide binding                              | 4 | 4.49 | 0.00453 | P47989, P00390, P29474, P35228 |
| GOTERM_MF_DIRECT | GO:0008233~peptidase activity                                               | 4 | 4.49 | 0.01161 | P08246, P42574, P05067, P00797 |
| GOTERM_MF_DIRECT | GO:0005178~integrin binding                                                 | 4 | 4.49 | 0.01752 | P05019, P35968, P12931, P00533 |
| GOTERM_MF_DIRECT | GO:0005088~Ras guanyl-nucleotide exchange factor activity                   | 4 | 4.49 | 0.02224 | P60568, P11362, P21802, P00533 |
| GOTERM_MF_DIRECT | GO:0032052~bile acid binding                                                | 3 | 3.37 | 0.00074 | Q96RI1, P06737, Q04828         |
| GOTERM_MF_DIRECT | GO:0004716~receptor signaling protein tyrosine kinase activity              | 3 | 3.37 | 0.00118 | P35968, P06213, P00533         |
| GOTERM_MF_DIRECT | GO:0043560~insulin receptor substrate binding                               | 3 | 3.37 | 0.00143 | P27986, Q06124, P06213         |
| GOTERM_MF_DIRECT | GO:0004707~MAP kinase activity                                              | 3 | 3.37 | 0.00235 | P28482, Q16539, P45983         |
| GOTERM_MF_DIRECT | GO:0046965~retinoid X receptor                                              | 3 | 3.37 | 0.0027  | Q96RI1, P37231, P55055         |
| GOTERM_MF_DIRECT | GO:0046875~ephrin receptor binding                                          | 3 | 3.37 | 0.00805 | P12931, P48736, P18031         |
| GOTERM_MF_DIRECT | GO:0051721~protein phosphatase 2A binding                                   | 3 | 3.37 | 0.00866 | P04035, P18031, P31749         |
| GOTERM_MF_DIRECT | GO:0004712~protein serine/threonine/tyr                                     | 3 | 3.37 | 0.00996 | Q96GD4, Q07912, P31749         |
| GOTERM_MF_DIRECT | GO:0030331~estrogen receptor binding                                        | 3 | 3.37 | 0.0159  | P12931, P37231, P09874         |
| GOTERM_MF_DIRECT | GO:0001046~core promoter sequence-specific DNA binding                      | 3 | 3.37 | 0.02113 | P03372, P37231, P35398         |
| GOTERM_MF_DIRECT | GO:0042626~ATPase activity, coupled to transmembrane movement of substances | 3 | 3.37 | 0.02206 | P33527, P08183, Q9UNQ0         |
| GOTERM_MF_DIRECT | GO:0097110~scaffold protein binding                                         | 3 | 3.37 | 0.02595 | P12931, Q00987, P29474         |
| GOTERM_MF_DIRECT | GO:0004175~endopeptidase activity                                           | 3 | 3.37 | 0.03227 | P08246, P14780, P39900         |
| GOTERM_MF_DIRECT | GO:0003990~acetylcholinesterase                                             | 2 | 2.25 | 0.0104  | P22303, P06276                 |

|                  |                                                                  |   |      |         |                |
|------------------|------------------------------------------------------------------|---|------|---------|----------------|
| GOTERM_MF_DIRECT | GO:0004104~cholinesterase activity                               | 2 | 2.25 | 0.01556 | P22303, P06276 |
| GOTERM_MF_DIRECT | GO:0004517~nitric-oxide synthase activity                        | 2 | 2.25 | 0.01556 | P29474, P35228 |
| GOTERM_MF_DIRECT | GO:0070851~growth factor receptor binding                        | 2 | 2.25 | 0.02069 | P12931, P05067 |
| GOTERM_MF_DIRECT | GO:0043208~glycosphingolipid                                     | 2 | 2.25 | 0.02069 | P60568, P16109 |
| GOTERM_MF_DIRECT | GO:0051425~PTB domain binding                                    | 2 | 2.25 | 0.02069 | P05067, P06213 |
| GOTERM_MF_DIRECT | GO:0034617~tetrahydrobiopterin                                   | 2 | 2.25 | 0.02069 | P29474, P35228 |
| GOTERM_MF_DIRECT | GO:0008559~xenobiotic-transporting ATPase activity               | 2 | 2.25 | 0.0258  | P08183, Q9UNQ0 |
| GOTERM_MF_DIRECT | GO:0051525~NFAT protein binding                                  | 2 | 2.25 | 0.0258  | Q16539, Q07869 |
| GOTERM_MF_DIRECT | GO:0005007~fibroblast growth factor-activated receptor activity  | 2 | 2.25 | 0.0258  | P11362, P21802 |
| GOTERM_MF_DIRECT | GO:0043559~insulin binding                                       | 2 | 2.25 | 0.0258  | P27986, P06213 |
| GOTERM_MF_DIRECT | GO:0004784~superoxide dismutase activity                         | 2 | 2.25 | 0.0258  | P04179, P15559 |
| GOTERM_MF_DIRECT | GO:0034618~arginine binding                                      | 2 | 2.25 | 0.03593 | P29474, P35228 |
| GOTERM_MF_DIRECT | GO:0005021~vascular endothelial growth factor-activated receptor | 2 | 2.25 | 0.03593 | P36888, P35968 |
| GOTERM_MF_DIRECT | GO:0004887~thyroid hormone receptor activity                     | 2 | 2.25 | 0.04096 | Q96RI1, O75469 |
