# Supplementary material for: Systematic Elucidation of the Potential Mechanism of Erzhi Pill against Drug‐Induced Liver Injury via Network Pharmacology Approach
Source: Hindawi journal article supplement (doi:10.1155/2020/6219432), 2020-01-01
Supplement: f1 [file 6219432.f1.zip]

**Table S2 Targets related to DILI**

| Targets from<br><b>DrugBank</b> | Targets from<br><b>GeneCards</b> |
|---------------------------------|----------------------------------|
| P21554                          | P01375                           |
| Q15822                          | P05231                           |
| Q05901                          | P04637                           |
| P10632                          | P01308                           |
| Q86VL8                          | P01584                           |
| Q2M3G0                          | P01579                           |
| P08183                          | P00734                           |
| P31948                          | P22301                           |
| P00387                          | P01137                           |
| P06737                          | P25445                           |
| Q12882                          | P42574                           |
| Q9UHQ9                          | P02768                           |
| P23141                          | P35228                           |
| P04275                          | Q14790                           |
| Q96RQ9                          | P00533                           |
| P07148                          | P10145                           |
| Q9UI32                          | P05362                           |
| P49788                          | P24298                           |
| P41743                          | P10635                           |
| P33261                          | P48023                           |
| P30041                          | P08183                           |
| P11498                          | P11712                           |
| Q8NFI5                          | P35354                           |
| P39900                          | P13500                           |
| P05089                          | P15692                           |
| Q9Y694                          | P02649                           |
| P04080                          | P04275                           |
| Q13867                          | Q9TQE0                           |
| P50416                          | P12821                           |
| P11168                          | P28482                           |
| Q06520                          | P08684                           |
| P01308                          | P01106                           |
| P02753                          | P30491                           |
| P05186                          | P33261                           |
| P55789                          | P05164                           |
| P98066                          | P35222                           |
| P09467                          | P37231                           |
| O95255                          | P31749                           |
| P24298                          | Q16665                           |
| Q9H222                          | P29965                           |
| Q9H221                          | P05181                           |
| P05177                          | P01589                           |
| P41235                          | P24385                           |
| P04798                          | P10415                           |
| P33260                          | P12259                           |
| Q96SL4                          | Q30201                           |
| P13584                          | P60568                           |
| O43272                          | P45983                           |
| Q13133                          | Q9NRA2                           |
| P20815                          | P41159                           |

| Total targets after<br>eliminating the redundancy |            |
|---------------------------------------------------|------------|
| Entry                                             | Gene names |
| P21554                                            | CNR1       |
| Q15822                                            | CHRNA2     |
| Q05901                                            | CHRNA3     |
| P10632                                            | CYP2C8     |
| Q86VL8                                            | SLC47A2    |
| Q2M3G0                                            | ABCB5      |
| P08183                                            | ABCB1      |
| P31948                                            | STIP1      |
| P00387                                            | CYB5R3     |
| P06737                                            | PYGL       |
| Q12882                                            | DPYD       |
| Q9UHQ9                                            | CYB5R1     |
| P23141                                            | CES1       |
| P04275                                            | VWF        |
| Q96RQ9                                            | IL4I1      |
| P07148                                            | FABP1      |
| Q9UI32                                            | GLS2       |
| P49788                                            | RARRES1    |
| P41743                                            | PRKCI      |
| P33261                                            | CYP2C19    |
| P30041                                            | PRDX6      |
| P11498                                            | PC         |
| Q8NFI5                                            | GPRC5A     |
| P39900                                            | MMP12      |
| P05089                                            | ARG1       |
| Q9Y694                                            | SLC22A7    |
| P04080                                            | CSTB       |
| Q13867                                            | BLMH       |
| P50416                                            | CPT1A      |
| P11168                                            | SLC2A2     |
| Q06520                                            | SULT2A1    |
| P01308                                            | INS        |
| P02753                                            | RBP4       |
| P05186                                            | ALPL       |
| P55789                                            | GFER       |
| P98066                                            | TNFAIP6    |
| P09467                                            | FBP1       |
| O95255                                            | ABCC6      |
| P24298                                            | GPT        |
| Q9H222                                            | ABCG5      |
| Q9H221                                            | ABCG8      |
| P05177                                            | CYP1A2     |
| P41235                                            | HNF4A      |
| P04798                                            | CYP1A1     |
| P33260                                            | CYP2C18    |
| Q96SL4                                            | GPX7       |
| P13584                                            | CYP4B1     |
| O43272                                            | PRODH      |
| Q13133                                            | NR1H3      |

|        |        |
|--------|--------|
| P24462 | P16410 |
| Q9NPD5 | P09601 |
| P02647 | P05121 |
| P49638 | P01133 |
| P23381 | P14780 |
| Q9Y6L6 | P60484 |
| P98160 | P19438 |
| P20813 | P02741 |
| P21453 | P02787 |
| O14791 | P42345 |
| P22570 | P11166 |
| O14939 | Q96RI1 |
| Q07820 | P10316 |
| PI9525 | P04040 |
| Q16568 | P01138 |
| Q04828 | P14136 |
| P02778 | P14210 |
| Q6NUM9 | P07204 |
| Q14624 | P13726 |
| P30043 | Q15848 |
| Q16881 | P23786 |
| PI1712 | P00441 |
| PI8825 | P18510 |
| PI0176 | P01100 |
| Q15238 | P05112 |
| O95470 | P42771 |
| Q9UHC9 | P10147 |
| Q92570 | P05019 |
| Q9P0J0 | P01588 |
| Q96Q40 | P40763 |
| P55055 | P35225 |
| PI6118 | O00206 |
| PI3945 | P01583 |
| Q9HD40 | P01009 |
| Q9H0K1 | P04114 |
| Q04760 | P02647 |
| P05107 | P01562 |
| P51692 | P29474 |
| P35557 | P05305 |
| Q14032 | P42336 |
| P51161 | P41235 |
| P07550 | P05177 |
| P08588 | P21964 |
| P30520 | P23560 |
| P28907 | P21817 |
| P08684 | O60674 |
| O14788 | P22309 |
| O75340 | P14416 |
| P29508 | P05412 |
| P30613 | Q07812 |
| P35968 | Q96P20 |
| Q5NUL3 | P00797 |
| P08100 | P11413 |
| P33681 | P99999 |
| Q02156 | P05067 |
| P43353 | P16671 |
| P23469 | P01116 |

|        |          |
|--------|----------|
| P20815 | CYP3A5   |
| P24462 | CYP3A7   |
| Q9NPD5 | SLCO1B3  |
| P02647 | APOA1    |
| P49638 | TTPA     |
| P23381 | WARS     |
| Q9Y6L6 | SLCO1B1  |
| P98160 | HSPG2    |
| P20813 | CYP2B6   |
| P21453 | S1PR1    |
| O14791 | APOL1    |
| P22570 | FDXR     |
| O14939 | PLD2     |
| Q07820 | MCL1     |
| PI9525 | EIF2AK2  |
| Q16568 | CARTPT   |
| Q04828 | AKR1C1   |
| P02778 | CXCL10   |
| Q6NUM9 | RETSAT   |
| Q14624 | ITIH4    |
| P30043 | BLVRB    |
| Q16881 | TXNRD1   |
| PI1712 | CYP2C9   |
| PI8825 | ADRA2C   |
| PI0176 | COX8A    |
| Q15238 | PSG5     |
| O95470 | SGPL1    |
| Q9UHC9 | NPC1L1   |
| Q92570 | NR4A3    |
| Q9P0J0 | NDUFA13  |
| Q96Q40 | CDK15    |
| P55055 | NR1H2    |
| PI6118 | PFKFB1   |
| PI3945 | ADRB3    |
| Q9HD40 | SEPSECS  |
| Q9H0K1 | SIK2     |
| Q04760 | GLO1     |
| P05107 | ITGB2    |
| P51692 | STAT5B   |
| P35557 | GCK      |
| Q14032 | BAAT     |
| P51161 | FABP6    |
| P07550 | ADRB2    |
| P08588 | ADRB1    |
| P30520 | ADSS     |
| P28907 | CD38     |
| P08684 | CYP3A4   |
| O14788 | TNFSF11  |
| O75340 | PDCD6    |
| P29508 | SERPINB3 |
| P30613 | PKLR     |
| P35968 | KDR      |
| Q5NUL3 | FFAR4    |
| P08100 | RHO      |
| P33681 | CD80     |
| Q02156 | PRKCE    |
| P43353 | ALDH3B1  |

|        |        |
|--------|--------|
| Q9Y5N1 | P10721 |
| P19235 | P51681 |
| Q96KS0 | P04626 |
| Q9BV57 | P98170 |
| Q16539 | P48061 |
| P27986 | P13569 |
| O00459 | P50591 |
| P29474 | P10636 |
| P08913 | Q07869 |
| P18089 | P11245 |
| P36888 | P40225 |
| P32238 | P27361 |
| P62993 | Q16236 |
| P30044 | O14746 |
| P20333 | P01920 |
| O00748 | P00740 |
| Q15413 | O95342 |
| Q969G6 | Q07817 |
| Q99584 | P22004 |
| Q13464 | P08581 |
| P78348 | P06881 |
| P18031 | P01112 |
| Q14643 | P25054 |
| P31942 | P09488 |
| Q9Y5Y4 | P06858 |
| P03950 | Q16539 |
| Q05655 | P55211 |
| Q99497 | P05113 |
| Q8IU85 | P37840 |
| P01009 | O95477 |
| P07900 | P09038 |
| Q96PY6 | P17813 |
| Q96QT4 | Q14116 |
| P20138 | P09919 |
| O75838 | P01008 |
| P10276 | P40939 |
| O75676 | P27797 |
| Q9UQB9 | Q04206 |
| Q16678 | P19440 |
| Q14721 | P11215 |
| P17252 | P02771 |
| P01023 | P12830 |
| P02775 | P02766 |
| Q9Y2I1 | P01130 |
| Q13163 | P08246 |
| P05771 | P09874 |
| P11142 | P38936 |
| P62745 | P00451 |
| P07814 | P04798 |
| P43026 | P21439 |
| P20273 | P07101 |
| P63000 | P04818 |
| Q96PD7 | P12643 |
| Q8TDS4 | O15455 |
| Q99527 | P09211 |
| P16070 | P42224 |
| P30405 | Q92887 |

|        |          |
|--------|----------|
| P23469 | PTPRE    |
| Q9Y5N1 | HRH3     |
| P19235 | EPOR     |
| Q96KS0 | EGLN2    |
| Q9BV57 | ADII     |
| Q16539 | MAPK14   |
| P27986 | PIK3R1   |
| O00459 | PIK3R2   |
| P29474 | NOS3     |
| P08913 | ADRA2A   |
| P18089 | ADRA2B   |
| P36888 | FLT3     |
| P32238 | CCKAR    |
| P62993 | GRB2     |
| P30044 | PRDX5    |
| P20333 | TNFRSF1B |
| O00748 | CES2     |
| Q15413 | RYS3     |
| Q969G6 | RFK      |
| Q99584 | S100A13  |
| Q13464 | ROCK1    |
| P78348 | ASIC1    |
| P18031 | PTPN1    |
| Q14643 | ITPR1    |
| P31942 | HNRNPH3  |
| Q9Y5Y4 | PTGDR2   |
| P03950 | ANG      |
| Q05655 | PRKCD    |
| Q99497 | PARK7    |
| Q8IU85 | CAMK1D   |
| P01009 | SERPINA1 |
| P07900 | HSP90AA1 |
| Q96PY6 | NEK1     |
| Q96QT4 | TRPM7    |
| P20138 | CD33     |
| O75838 | CIB2     |
| P10276 | RARA     |
| O75676 | RPS6KA4  |
| Q9UQB9 | AURKC    |
| Q16678 | CYP1B1   |
| Q14721 | KCNB1    |
| P17252 | PRKCA    |
| P01023 | A2M      |
| P02775 | PPBP     |
| Q9Y2I1 | NISCH    |
| Q13163 | MAP2K5   |
| P05771 | PRKCB    |
| P11142 | HSPA8    |
| P62745 | RHOB     |
| P07814 | EPRS     |
| P43026 | GDF5     |
| P20273 | CD22     |
| P63000 | RAC1     |
| Q96PD7 | DGAT2    |
| Q8TDS4 | HCAR2    |
| Q99527 | GPB1     |
| P16070 | CD44     |

|        |        |
|--------|--------|
| O14786 | P30556 |
| P28062 | P01909 |
| Q15746 | P16109 |
| P09619 | P04035 |
| P48745 | P06213 |
| Q86UE8 | P01344 |
| P43487 | P35968 |
| O15197 | P10451 |
| P61073 | P19838 |
| P05129 | P04141 |
| P01042 | P11532 |
| O15530 | P00742 |
| P51812 | P13501 |
| P53667 | P01127 |
| Q03518 | P11802 |
| O75116 | O75874 |
| Q16513 | P00492 |
| P42680 | P08700 |
| Q9NQU5 | Q9Y2R2 |
| O00206 | P12318 |
| Q9H093 | P54098 |
| Q9Y6E0 | P02778 |
| P04406 | P61278 |
| Q7Z2W7 | P51671 |
| P29317 | P0C0L4 |
| Q07912 | P02545 |
| Q04759 | Q9BZS1 |
| Q15139 | P51580 |
| O14920 | Q16552 |
| Q9HC29 | P16581 |
| O15264 | P01024 |
| Q13131 | P51587 |
| O43293 | P19320 |
| P57059 | Q76LX8 |
| Q9H6Z9 | P08253 |
| P36896 | P28329 |
| P06241 | O75197 |
| P16389 | P04179 |
| Q99828 | P36888 |
| Q13882 | O15553 |
| P16234 | P07900 |
| P45984 | P03372 |
| Q06418 | P15502 |
| P20742 | O60603 |
| O60674 | P05089 |
| P51813 | P03956 |
| Q96GD4 | P48735 |
| Q15418 | P81172 |
| P17612 | P11226 |
| P42338 | Q9UJS0 |
| P35398 | P09104 |
| O60285 | P15559 |
| P51787 | P20813 |
| Q13164 | Q06124 |
| Q9HBH9 | P04271 |
| P52564 | P00738 |
| P49840 | Q8IZI9 |

|        |         |
|--------|---------|
| P30405 | PPIF    |
| O14786 | NRPI    |
| P28062 | PSMB8   |
| Q15746 | MYLK    |
| P09619 | PDGFRB  |
| P48745 | CCN3    |
| Q86UE8 | TLK2    |
| P43487 | RANBP1  |
| O15197 | EPHB6   |
| P61073 | CXCR4   |
| P05129 | PRKCG   |
| P01042 | KNG1    |
| O15530 | PDPK1   |
| P51812 | RPS6KA3 |
| P53667 | LIMK1   |
| Q03518 | TAPI    |
| O75116 | ROCK2   |
| Q16513 | PKN2    |
| P42680 | TEC     |
| Q9NQU5 | PAK6    |
| O00206 | TLR4    |
| Q9H093 | NUAK2   |
| Q9Y6E0 | STK24   |
| P04406 | GAPDH   |
| Q7Z2W7 | TRPM8   |
| P29317 | EPHA2   |
| Q07912 | TNK2    |
| Q04759 | PRKCQ   |
| Q15139 | PRKD1   |
| O14920 | IKBKB   |
| Q9HC29 | NOD2    |
| O15264 | MAPK13  |
| Q13131 | PRKAA1  |
| O43293 | DAPK3   |
| P57059 | SIK1    |
| Q9H6Z9 | EGLN3   |
| P36896 | ACVR1B  |
| P06241 | FYN     |
| P16389 | KCNA2   |
| Q99828 | CIB1    |
| Q13882 | PTK6    |
| P16234 | PDGFRA  |
| P45984 | MAPK9   |
| Q06418 | TYRO3   |
| P20742 | PZP     |
| O60674 | JAK2    |
| P51813 | BMX     |
| Q96GD4 | AURKB   |
| Q15418 | RPS6KA1 |
| P17612 | PRKACA  |
| P42338 | PIK3CB  |
| P35398 | RORA    |
| O60285 | NUAK1   |
| P51787 | KCNQ1   |
| Q13164 | MAPK7   |
| Q9HBH9 | MKNK2   |
| P52564 | MAP2K6  |

|        |        |
|--------|--------|
| O00329 | P22303 |
| P05412 | Q03135 |
| Q99829 | P23219 |
| P28482 | P20823 |
| P07332 | O15392 |
| P24941 | Q13315 |
| PI9838 | P01042 |
| P29590 | P00747 |
| P36404 | O60260 |
| P00519 | Q13813 |
| Q8IYT8 | P61073 |
| P54764 | P35498 |
| Q15759 | P0C0L5 |
| PI0909 | P42898 |
| Q13188 | P01236 |
| Q9H2X6 | P21554 |
| Q8IW41 | P30499 |
| P56537 | P01019 |
| Q13177 | P05787 |
| Q99653 | Q9Y259 |
| Q9HBA0 | P16220 |
| P31749 | Q16667 |
| Q14164 | P35575 |
| Q13153 | P51608 |
| P23246 | P00395 |
| P06702 | P10253 |
| Q9HB55 | P47989 |
| Q05513 | P15976 |
| P35348 | P08670 |
| P35368 | P08575 |
| P25100 | O43520 |
| Q14571 | P09936 |
| Q14573 | P01160 |
| P04839 | P05783 |
| PI3498 | P12004 |
| PI4598 | P01189 |
| PI9878 | P08758 |
| Q15080 | Q7Z6L0 |
| PI5153 | P00749 |
| P54646 | P11912 |
| Q9Y478 | P33527 |
| O43741 | P20815 |
| P54619 | Q9UNQ0 |
| Q9UGJ0 | P20674 |
| Q9UGI9 | O75469 |
| Q00653 | P25942 |
|        | P34932 |
|        | P00750 |
|        | P02818 |
|        | P01111 |
|        | P48357 |
|        | Q13158 |
|        | Q15116 |
|        | P29401 |
|        | P12931 |
|        | P11509 |
|        | O43181 |

|        |          |
|--------|----------|
| P49840 | GSK3A    |
| O00329 | PIK3CD   |
| P05412 | JUN      |
| Q99829 | CPNE1    |
| P28482 | MAPK1    |
| P07332 | FES      |
| P24941 | CDK2     |
| PI9838 | NFKB1    |
| P29590 | PML      |
| P36404 | ARL2     |
| P00519 | ABL1     |
| Q8IYT8 | ULK2     |
| P54764 | EPHA4    |
| Q15759 | MAPK11   |
| PI0909 | CLU      |
| Q13188 | STK3     |
| Q9H2X6 | HIPK2    |
| Q8IW41 | MAPKAPK5 |
| P56537 | EIF6     |
| Q13177 | PAK2     |
| Q99653 | CHP1     |
| Q9HBA0 | TRPV4    |
| P31749 | AKT1     |
| Q14164 | IKBKE    |
| Q13153 | PAK1     |
| P23246 | SFPQ     |
| P06702 | S100A9   |
| Q9HB55 | CYP3A43  |
| Q05513 | PRKCZ    |
| P35348 | ADRA1A   |
| P35368 | ADRA1B   |
| P25100 | ADRA1D   |
| Q14571 | ITPR2    |
| Q14573 | ITPR3    |
| P04839 | CYBB     |
| PI3498 | CYBA     |
| PI4598 | NCF1     |
| PI9878 | NCF2     |
| Q15080 | NCF4     |
| PI5153 | RAC2     |
| P54646 | PRKAA2   |
| Q9Y478 | PRKAB1   |
| O43741 | PRKAB2   |
| P54619 | PRKAG1   |
| Q9UGJ0 | PRKAG2   |
| Q9UGI9 | PRKAG3   |
| Q00653 | NFKB2    |
| P01375 | TNF      |
| P05231 | IL6      |
| P04637 | TP53     |
| P01584 | IL1B     |
| P01579 | IFNG     |
| P00734 | F2       |
| P22301 | IL10     |
| P01137 | TGFB1    |
| P25445 | FAS      |
| P42574 | CASP3    |

|        |
|--------|
| O00443 |
| P21583 |
| P39905 |
| Q9HC29 |
| P28223 |
| Q9BYX4 |
| Q14653 |
| P14778 |
| Q07820 |
| P06276 |
| P02786 |
| P49715 |
| P15056 |
| P04629 |
| P09429 |
| P00390 |
| P09917 |
| P21802 |
| P48736 |
| P09603 |
| Q12882 |
| O14788 |
| P06737 |
| P05187 |
| P55055 |
| P01011 |
| P07550 |
| Q13568 |
| P60033 |
| P01303 |
| O00220 |
| P11473 |
| P04839 |
| Q16620 |
| P29466 |
| P49682 |
| P17693 |
| P46531 |
| P21397 |
| P14222 |
| Q9NST1 |
| P68871 |
| P08709 |
| O14936 |
| Q9BYW2 |
| P08603 |
| P00374 |
| P01033 |
| P35670 |
| P14174 |
| P05106 |
| P04049 |
| P61769 |
| P04150 |
| P20333 |
| P00450 |
| P06850 |

|        |          |
|--------|----------|
| P02768 | ALB      |
| P35228 | NOS2     |
| Q14790 | CASP8    |
| P00533 | EGFR     |
| P10145 | CXCL8    |
| P05362 | ICAM1    |
| P10635 | CYP2D6   |
| P48023 | FASLG    |
| P35354 | PTGS2    |
| P13500 | CCL2     |
| P15692 | VEGFA    |
| P02649 | APOE     |
| Q9TQE0 | HLA-DRB1 |
| P12821 | ACE      |
| P01106 | MYC      |
| P30491 | HLA-B    |
| P05164 | MPO      |
| P35222 | CTNNB1   |
| P37231 | PPARG    |
| Q16665 | HIF1A    |
| P29965 | CD40LG   |
| P05181 | CYP2E1   |
| P01589 | IL2RA    |
| P24385 | CCND1    |
| P10415 | BCL2     |
| P12259 | F5       |
| Q30201 | HFE      |
| P60568 | IL2      |
| P45983 | MAPK8    |
| Q9NRA2 | SLC17A5  |
| P41159 | LEP      |
| P16410 | CTLA4    |
| P09601 | HMOX1    |
| P05121 | SERPINE1 |
| P01133 | EGF      |
| P14780 | MMP9     |
| P60484 | PTEN     |
| P19438 | TNFRSF1A |
| P02741 | CRP      |
| P02787 | TF       |
| P42345 | MTOR     |
| P11166 | SLC2A1   |
| Q96RI1 | NR1H4    |
| P10316 | HLA-A    |
| P04040 | CAT      |
| P01138 | NGF      |
| P14136 | GFAP     |
| P14210 | HGF      |
| P07204 | THBD     |
| P13726 | F3       |
| Q15848 | ADIPOQ   |
| P23786 | CPT2     |
| P00441 | SOD1     |
| P18510 | IL1RN    |
| P01100 | FOS      |
| P05112 | IL4      |
| P42771 | CDKN2A   |

|        |
|--------|
| P29475 |
| O60934 |
| P21757 |
| P16930 |
| Q09428 |
| Q13427 |
| P00813 |
| O14763 |
| Q13224 |
| Q05655 |
| P11362 |
| P38398 |
| Q00987 |
| P17252 |
| P35372 |
| P01574 |
| P19544 |
| Q9HD89 |
| P01266 |
| P15941 |
| Q8NER1 |

|        |          |
|--------|----------|
| P10147 | CCL3     |
| P05019 | IGF1     |
| P01588 | EPO      |
| P40763 | STAT3    |
| P35225 | IL13     |
| P01583 | IL1A     |
| P04114 | APOB     |
| P01562 | IFNA1;   |
| P05305 | EDN1     |
| P42336 | PIK3CA   |
| P21964 | COMT     |
| P23560 | BDNF     |
| P21817 | RYR1     |
| P22309 | UGT1A1   |
| P14416 | DRD2     |
| Q07812 | BAX      |
| Q96P20 | NLRP3    |
| P00797 | REN      |
| P11413 | G6PD     |
| P99999 | CYCS     |
| P05067 | APP      |
| P16671 | CD36     |
| P01116 | KRAS     |
| P10721 | KIT      |
| P51681 | CCR5     |
| P04626 | ERBB2    |
| P98170 | XIAP     |
| P48061 | CXCL12   |
| P13569 | CFTR     |
| P50591 | TNFSF10  |
| P10636 | MAPT     |
| Q07869 | PPARA    |
| P11245 | NAT2     |
| P40225 | THPO     |
| P27361 | MAPK3    |
| Q16236 | NFE2L2   |
| O14746 | TERT     |
| P01920 | HLA-DQB1 |
| P00740 | F9       |
| O95342 | ABCB11   |
| Q07817 | BCL2L1   |
| P22004 | BMP6     |
| P08581 | MET      |
| P06881 | CALCA    |
| P01112 | HRAS     |
| P25054 | APC      |
| P09488 | GSTM1    |
| P06858 | LPL      |
| P55211 | CASP9    |
| P05113 | IL5      |
| P37840 | SNCA     |
| O95477 | ABCA1    |
| P09038 | FGF2     |
| P17813 | ENG      |
| Q14116 | IL18     |
| P09919 | CSF3     |
| P01008 | SERPINC1 |
| P40939 | HADHA    |

|        |          |
|--------|----------|
| P27797 | CALR     |
| Q04206 | RELA     |
| P19440 | GGT1     |
| P11215 | ITGAM    |
| P02771 | AFP      |
| P12830 | CDH1     |
| P02766 | TTR      |
| P01130 | LDLR     |
| P08246 | ELANE    |
| P09874 | PARP1    |
| P38936 | CDKN1A   |
| P00451 | F8       |
| P21439 | ABCB4    |
| P07101 | TH       |
| P04818 | TYMS     |
| P12643 | BMP2     |
| O15455 | TLR3     |
| P09211 | GSTP1    |
| P42224 | STAT1    |
| Q92887 | ABCC2    |
| P30556 | AGTR1    |
| P01909 | HLA-DQA1 |
| P16109 | SELP     |
| P04035 | HMGCR    |
| P06213 | INSR     |
| P01344 | IGF2     |
| P10451 | SPP1     |
| P04141 | CSF2     |
| P11532 | DMD      |
| P00742 | F10      |
| P13501 | CCL5     |
| P01127 | PDGFB    |
| P11802 | CDK4     |
| O75874 | IDH1     |
| P00492 | HPRT1    |
| P08700 | IL3      |
| Q9Y2R2 | PTPN22   |
| P12318 | FCGR2A   |
| P54098 | POLG     |
| P61278 | SST      |
| P51671 | CCL11    |
| P0C0L4 | C4A      |
| P02545 | LMNA     |
| Q9BZS1 | FOXP3    |
| P51580 | TPMT     |
| Q16552 | IL17A    |
| P16581 | SELE     |
| P01024 | C3       |
| P51587 | BRCA2    |
| P19320 | VCAM1    |
| Q76LX8 | ADAMTS13 |
| P08253 | MMP2     |
| P28329 | CHAT     |
| O75197 | LRP5     |
| P04179 | SOD2     |
| O15553 | MEFV     |
| P03372 | ESR1     |
| P15502 | ELN      |



|        |          |
|--------|----------|
| O60603 | TLR2     |
| P03956 | MMP1     |
| P48735 | IDH2     |
| P81172 | HAMP     |
| P11226 | MBL2     |
| Q9UJS0 | SLC25A13 |
| P09104 | ENO2     |
| P15559 | NQO1     |
| Q06124 | PTPN11   |
| P04271 | S100B    |
| P00738 | HP       |
| Q8IZI9 | IFNL3    |
| P22303 | ACHE     |
| Q03135 | CAV1     |
| P23219 | PTGS1    |
| P20823 | HNF1A    |
| O15392 | BIRC5    |
| Q13315 | ATM      |
| P00747 | PLG      |
| O60260 | PRKN     |
| Q13813 | SPTAN1   |
| P35498 | SCN1A    |
| P0C0L5 | C4B      |
| P42898 | MTHFR    |
| P01236 | PRL      |
| P30499 | HLA-C    |
| P01019 | AGT      |
| P05787 | KRT8     |
| Q9Y259 | CHKB     |
| P16220 | CREB1    |
| Q16667 | CDKN3    |
| P35575 | G6PC     |
| P51608 | MECP2    |
| P00395 | MT-CO1   |
| P10253 | GAA      |
| P47989 | XDH      |
| P15976 | GATA1    |
| P08670 | VIM      |
| P08575 | PTPRC    |
| O43520 | ATP8B1   |
| P09936 | UCHL1    |
| P01160 | NPPA     |
| P05783 | KRT18    |
| P12004 | PCNA     |
| P01189 | POMC     |
| P08758 | ANXA5    |
| Q7Z6L0 | PRRT2    |
| P00749 | PLAU     |
| P11912 | CD79A    |
| P33527 | ABCC1    |
| Q9UNQ0 | ABCG2    |
| P20674 | COX5A    |
| O75469 | NR1I2    |
| P25942 | CD40     |
| P34932 | HSPA4    |
| P00750 | PLAT     |
| P02818 | BGLAP    |
| P01111 | NRAS     |

|        |           |
|--------|-----------|
| P48357 | LEPR      |
| Q13158 | FADD      |
| Q15116 | PDCD1     |
| P29401 | TKT       |
| P12931 | SRC       |
| P11509 | CYP2A6    |
| O43181 | NDUFS4    |
| O00443 | PIK3C2A   |
| P21583 | KITLG     |
| P39905 | GDNF      |
| P28223 | HTR2A     |
| Q9BYX4 | IFIH1     |
| Q14653 | IRF3      |
| P14778 | IL1R1     |
| P06276 | BCHE      |
| P02786 | TFRC      |
| P49715 | CEBPA     |
| P15056 | BRAF      |
| P04629 | NTRK1     |
| P09429 | HMGB1     |
| P00390 | GSR       |
| P09917 | ALOX5     |
| P21802 | FGFR2     |
| P48736 | PIK3CG    |
| P09603 | CSF1      |
| P05187 | ALPP      |
| P01011 | SERPINA3  |
| Q13568 | IRF5      |
| P60033 | CD81      |
| P01303 | NPY       |
| O00220 | TNFRSF10A |
| P11473 | VDR       |
| Q16620 | NTRK2     |
| P29466 | CASP1     |
| P49682 | CXCR3     |
| P17693 | HLA-G     |
| P46531 | NOTCH1    |
| P21397 | MAOA      |
| P14222 | PRF1      |
| Q9NST1 | PNPLA3    |
| P68871 | HBB       |
| P08709 | F7        |
| O14936 | CASK      |
| Q9BYW2 | SETD2     |
| P08603 | CFH       |
| P00374 | DHFR      |
| P01033 | TIMP1     |
| P35670 | ATP7B     |
| P14174 | MIF       |
| P05106 | ITGB3     |
| P04049 | RAF1      |
| P61769 | B2M       |
| P04150 | NR3C1     |
| P00450 | CP        |
| P06850 | CRH       |
| P29475 | NOS1      |
| O60934 | NBN       |
| P21757 | MSR1      |

|        |           |
|--------|-----------|
| P16930 | FAH       |
| Q09428 | ABCC8     |
| Q13427 | PPIG      |
| P00813 | ADA       |
| O14763 | TNFRSF10B |
| Q13224 | GRIN2B    |
| P11362 | FGFR1     |
| P38398 | BRCA1     |
| Q00987 | MDM2      |
| P35372 | OPRM1     |
| P01574 | IFNB1     |
| P19544 | WT1       |
| Q9HD89 | RETN      |
| P01266 | TG        |
| P15941 | MUC1      |
| Q8NER1 | TRPV1     |
