# Supplementary material for: Systematic Elucidation of the Potential Mechanism of Erzhi Pill against Drug‐Induced Liver Injury via Network Pharmacology Approach
Source: Hindawi journal article supplement (doi:10.1155/2020/6219432), 2020-01-01
Supplement: f1 [file 6219432.f1.zip]

**Title: Uncovering the pharmacological mechanism of Erzhi pill on drug-induced liver injury based on network pharmacology**

**Table S1 Putative targets for chemicals contained in EZP**

| Chemname        | Entry  | Entry name  | Organism             |
|-----------------|--------|-------------|----------------------|
| beta-sitosterol | P52895 | AKIC2_HUMAN | Homo sapiens (Human) |
| beta-sitosterol | P27338 | AOFB_HUMAN  | Homo sapiens (Human) |
| beta-sitosterol | P11309 | PIM1_HUMAN  | Homo sapiens (Human) |
| beta-sitosterol | P12643 | BMP2_HUMAN  | Homo sapiens (Human) |
| beta-sitosterol | P08842 | STS_HUMAN   | Homo sapiens (Human) |
| beta-sitosterol | P49137 | MAPK2_HUMAN | Homo sapiens (Human) |
| beta-sitosterol | P02652 | APOA2_HUMAN | Homo sapiens (Human) |
| beta-sitosterol | P55210 | CASP7_HUMAN | Homo sapiens (Human) |
| beta-sitosterol | P10828 | THB_HUMAN   | Homo sapiens (Human) |
| beta-sitosterol | P00918 | CAH2_HUMAN  | Homo sapiens (Human) |
| beta-sitosterol | P02768 | ALBU_HUMAN  | Homo sapiens (Human) |
| beta-sitosterol | P28482 | MK01_HUMAN  | Homo sapiens (Human) |
| beta-sitosterol | P06401 | PRGR_HUMAN  | Homo sapiens (Human) |
| beta-sitosterol | P08235 | MCR_HUMAN   | Homo sapiens (Human) |
| beta-sitosterol | P14061 | DHB1_HUMAN  | Homo sapiens (Human) |
| beta-sitosterol | P45452 | MMP13_HUMAN | Homo sapiens (Human) |
| beta-sitosterol | P52732 | KIF11_HUMAN | Homo sapiens (Human) |
| beta-sitosterol | P35398 | RORA_HUMAN  | Homo sapiens (Human) |
| beta-sitosterol | O76054 | S14L2_HUMAN | Homo sapiens (Human) |
| beta-sitosterol | P02774 | VTDB_HUMAN  | Homo sapiens (Human) |
| beta-sitosterol | P03372 | ESR1_HUMAN  | Homo sapiens (Human) |
| beta-sitosterol | Q06520 | ST2A1_HUMAN | Homo sapiens (Human) |
| beta-sitosterol | P20701 | ITAL_HUMAN  | Homo sapiens (Human) |
| beta-sitosterol | P78536 | ADA17_HUMAN | Homo sapiens (Human) |
| beta-sitosterol | Q16539 | MK14_HUMAN  | Homo sapiens (Human) |
| beta-sitosterol | P45983 | MK08_HUMAN  | Homo sapiens (Human) |
| beta-sitosterol | P28845 | DHI1_HUMAN  | Homo sapiens (Human) |
| beta-sitosterol | P02766 | TTHY_HUMAN  | Homo sapiens (Human) |
| beta-sitosterol | P24941 | CDK2_HUMAN  | Homo sapiens (Human) |
| beta-sitosterol | P10275 | ANDR_HUMAN  | Homo sapiens (Human) |
| beta-sitosterol | P12931 | SRC_HUMAN   | Homo sapiens (Human) |
| beta-sitosterol | Q07343 | PDE4B_HUMAN | Homo sapiens (Human) |
| beta-sitosterol | P00533 | EGFR_HUMAN  | Homo sapiens (Human) |
| beta-sitosterol | Q96RI1 | NR1H4_HUMAN | Homo sapiens (Human) |
| beta-sitosterol | P0DP23 | CALM1_HUMAN | Homo sapiens (Human) |
| beta-sitosterol | P0DP24 | CALM2_HUMAN | Homo sapiens (Human) |
| beta-sitosterol | P0DP25 | CALM3_HUMAN | Homo sapiens (Human) |
| beta-sitosterol | O15530 | PDPK1_HUMAN | Homo sapiens (Human) |
| beta-sitosterol | P63316 | TNNC1_HUMAN | Homo sapiens (Human) |
| beta-sitosterol | P00734 | THRB_HUMAN  | Homo sapiens (Human) |
| beta-sitosterol | P56817 | BACE1_HUMAN | Homo sapiens (Human) |
| beta-sitosterol | Q06124 | PTN11_HUMAN | Homo sapiens (Human) |
| beta-sitosterol | P11086 | PNMT_HUMAN  | Homo sapiens (Human) |
| beta-sitosterol | P53041 | PPP5_HUMAN  | Homo sapiens (Human) |
| beta-sitosterol | P36897 | TGFR1_HUMAN | Homo sapiens (Human) |
| beta-sitosterol | P04278 | SHBG_HUMAN  | Homo sapiens (Human) |
| beta-sitosterol | P15056 | BRAF_HUMAN  | Homo sapiens (Human) |
| beta-sitosterol | P00915 | CAH1_HUMAN  | Homo sapiens (Human) |
| beta-sitosterol | P23141 | EST1_HUMAN  | Homo sapiens (Human) |
| beta-sitosterol | P15121 | ALDR_HUMAN  | Homo sapiens (Human) |
| beta-sitosterol | P08758 | ANXA5_HUMAN | Homo sapiens (Human) |
| beta-sitosterol | P35968 | VGFR2_HUMAN | Homo sapiens (Human) |
| beta-sitosterol | O14757 | CHK1_HUMAN  | Homo sapiens (Human) |

|                 |        |             |                      |
|-----------------|--------|-------------|----------------------|
| beta-sitosterol | P37231 | PPARG_HUMAN | Homo sapiens (Human) |
| beta-sitosterol | P27487 | DPP4_HUMAN  | Homo sapiens (Human) |
| beta-sitosterol | Q16828 | DUS6_HUMAN  | Homo sapiens (Human) |
| beta-sitosterol | O43617 | TPPC3_HUMAN | Homo sapiens (Human) |
| beta-sitosterol | P49638 | TTPA_HUMAN  | Homo sapiens (Human) |
| beta-sitosterol | O60760 | HPGDS_HUMAN | Homo sapiens (Human) |
| beta-sitosterol | P50579 | MAP2_HUMAN  | Homo sapiens (Human) |
| beta-sitosterol | P04818 | TYSY_HUMAN  | Homo sapiens (Human) |
| beta-sitosterol | Q02127 | PYRD_HUMAN  | Homo sapiens (Human) |
| beta-sitosterol | Q14994 | NR1I3_HUMAN | Homo sapiens (Human) |
| beta-sitosterol | P08263 | GSTA1_HUMAN | Homo sapiens (Human) |
| beta-sitosterol | P00742 | FA10_HUMAN  | Homo sapiens (Human) |
| beta-sitosterol | P06276 | CHLE_HUMAN  | Homo sapiens (Human) |
| beta-sitosterol | P55263 | ADK_HUMAN   | Homo sapiens (Human) |
| beta-sitosterol | P42768 | WASP_HUMAN  | Homo sapiens (Human) |
| beta-sitosterol | Q9BY41 | HDAC8_HUMAN | Homo sapiens (Human) |
| beta-sitosterol | P08069 | IGF1R_HUMAN | Homo sapiens (Human) |
| beta-sitosterol | Q13126 | MTAP_HUMAN  | Homo sapiens (Human) |
| beta-sitosterol | Q04828 | AK1C1_HUMAN | Homo sapiens (Human) |
| beta-sitosterol | O00204 | ST2B1_HUMAN | Homo sapiens (Human) |
| beta-sitosterol | P02753 | RET4_HUMAN  | Homo sapiens (Human) |
| beta-sitosterol | P29474 | NOS3_HUMAN  | Homo sapiens (Human) |
| beta-sitosterol | P43405 | KSYK_HUMAN  | Homo sapiens (Human) |
| beta-sitosterol | Q13133 | NR1H3_HUMAN | Homo sapiens (Human) |
| beta-sitosterol | P19793 | RXRA_HUMAN  | Homo sapiens (Human) |
| beta-sitosterol | P54760 | EPHB4_HUMAN | Homo sapiens (Human) |
| beta-sitosterol | P11474 | ERR1_HUMAN  | Homo sapiens (Human) |
| beta-sitosterol | P15559 | NQO1_HUMAN  | Homo sapiens (Human) |
| beta-sitosterol | P62508 | ERR3_HUMAN  | Homo sapiens (Human) |
| beta-sitosterol | P55055 | NR1H2_HUMAN | Homo sapiens (Human) |
| beta-sitosterol | P00326 | ADH1G_HUMAN | Homo sapiens (Human) |
| beta-sitosterol | P04035 | HMDH_HUMAN  | Homo sapiens (Human) |
| beta-sitosterol | Q16850 | CP51A_HUMAN | Homo sapiens (Human) |
| kaempferol      | Q9NPH5 | NOX4_HUMAN  | Homo sapiens (Human) |
| kaempferol      | P15121 | ALDR_HUMAN  | Homo sapiens (Human) |
| kaempferol      | P47989 | XDH_HUMAN   | Homo sapiens (Human) |
| kaempferol      | P14679 | TYRO_HUMAN  | Homo sapiens (Human) |
| kaempferol      | P36888 | FLT3_HUMAN  | Homo sapiens (Human) |
| kaempferol      | P00918 | CAH2_HUMAN  | Homo sapiens (Human) |
| kaempferol      | P09917 | LOX5_HUMAN  | Homo sapiens (Human) |
| kaempferol      | P43166 | CAH7_HUMAN  | Homo sapiens (Human) |
| kaempferol      | P37059 | DHB2_HUMAN  | Homo sapiens (Human) |
| kaempferol      | P33527 | MRP1_HUMAN  | Homo sapiens (Human) |
| kaempferol      | P14061 | DHB1_HUMAN  | Homo sapiens (Human) |
| kaempferol      | P35869 | AHR_HUMAN   | Homo sapiens (Human) |
| kaempferol      | O43570 | CAH12_HUMAN | Homo sapiens (Human) |
| kaempferol      | P11474 | ERR1_HUMAN  | Homo sapiens (Human) |
| kaempferol      | P08183 | MDR1_HUMAN  | Homo sapiens (Human) |
| kaempferol      | Q16678 | CP1B1_HUMAN | Homo sapiens (Human) |
| kaempferol      | Q9UNQ0 | ABCG2_HUMAN | Homo sapiens (Human) |
| kaempferol      | P30542 | AA1R_HUMAN  | Homo sapiens (Human) |
| kaempferol      | P22748 | CAH4_HUMAN  | Homo sapiens (Human) |
| kaempferol      | P22303 | ACES_HUMAN  | Homo sapiens (Human) |
| kaempferol      | P21397 | AOFA_HUMAN  | Homo sapiens (Human) |
| kaempferol      | Q04760 | LGUL_HUMAN  | Homo sapiens (Human) |
| kaempferol      | P43405 | KSYK_HUMAN  | Homo sapiens (Human) |
| kaempferol      | P49841 | GSK3B_HUMAN | Homo sapiens (Human) |
| kaempferol      | P14780 | MMP9_HUMAN  | Homo sapiens (Human) |

|            |        |             |                      |
|------------|--------|-------------|----------------------|
| kaempferol | P08253 | MMP2_HUMAN  | Homo sapiens (Human) |
| kaempferol | P16050 | LOX15_HUMAN | Homo sapiens (Human) |
| kaempferol | P18054 | LOX12_HUMAN | Homo sapiens (Human) |
| kaempferol | Q13332 | PTPRS_HUMAN | Homo sapiens (Human) |
| kaempferol | P08631 | HCK_HUMAN   | Homo sapiens (Human) |
| kaempferol | P03372 | ESR1_HUMAN  | Homo sapiens (Human) |
| kaempferol | P06276 | CHLE_HUMAN  | Homo sapiens (Human) |
| kaempferol | P00734 | THRB_HUMAN  | Homo sapiens (Human) |
| kaempferol | P11309 | PIM1_HUMAN  | Homo sapiens (Human) |
| kaempferol | Q00534 | CDK6_HUMAN  | Homo sapiens (Human) |
| kaempferol | P62937 | PPIA_HUMAN  | Homo sapiens (Human) |
| kaempferol | P00533 | EGFR_HUMAN  | Homo sapiens (Human) |
| kaempferol | P04062 | GLCM_HUMAN  | Homo sapiens (Human) |
| kaempferol | P24941 | CDK2_HUMAN  | Homo sapiens (Human) |
| kaempferol | P02766 | TTHY_HUMAN  | Homo sapiens (Human) |
| kaempferol | Q9NP99 | TREM1_HUMAN | Homo sapiens (Human) |
| kaempferol | P00751 | CFAB_HUMAN  | Homo sapiens (Human) |
| kaempferol | P00390 | GSHR_HUMAN  | Homo sapiens (Human) |
| kaempferol | P00915 | CAH1_HUMAN  | Homo sapiens (Human) |
| kaempferol | P55055 | NR1H2_HUMAN | Homo sapiens (Human) |
| kaempferol | P53779 | MK10_HUMAN  | Homo sapiens (Human) |
| kaempferol | Q15078 | CD5R1_HUMAN | Homo sapiens (Human) |
| kaempferol | P03950 | ANGI_HUMAN  | Homo sapiens (Human) |
| kaempferol | P10275 | ANDR_HUMAN  | Homo sapiens (Human) |
| kaempferol | O15382 | BCAT2_HUMAN | Homo sapiens (Human) |
| kaempferol | P11142 | HSP7C_HUMAN | Homo sapiens (Human) |
| kaempferol | P12931 | SRC_HUMAN   | Homo sapiens (Human) |
| kaempferol | P06401 | PRGR_HUMAN  | Homo sapiens (Human) |
| kaempferol | P27338 | AOFB_HUMAN  | Homo sapiens (Human) |
| kaempferol | P45983 | MK08_HUMAN  | Homo sapiens (Human) |
| kaempferol | O14965 | AURKA_HUMAN | Homo sapiens (Human) |
| kaempferol | O15530 | PDPK1_HUMAN | Homo sapiens (Human) |
| kaempferol | P15559 | NQO1_HUMAN  | Homo sapiens (Human) |
| kaempferol | P00736 | C1R_HUMAN   | Homo sapiens (Human) |
| kaempferol | Q13126 | MTAP_HUMAN  | Homo sapiens (Human) |
| kaempferol | Q07343 | PDE4B_HUMAN | Homo sapiens (Human) |
| kaempferol | P06737 | PYGL_HUMAN  | Homo sapiens (Human) |
| kaempferol | P07858 | CATB_HUMAN  | Homo sapiens (Human) |
| kaempferol | O14757 | CHK1_HUMAN  | Homo sapiens (Human) |
| kaempferol | P56817 | BACE1_HUMAN | Homo sapiens (Human) |
| kaempferol | P00491 | PNPH_HUMAN  | Homo sapiens (Human) |
| kaempferol | Q08499 | PDE4D_HUMAN | Homo sapiens (Human) |
| kaempferol | P27707 | DCK_HUMAN   | Homo sapiens (Human) |
| kaempferol | O15496 | PA2GX_HUMAN | Homo sapiens (Human) |
| kaempferol | P07900 | HS90A_HUMAN | Homo sapiens (Human) |
| kaempferol | P00374 | DYR_HUMAN   | Homo sapiens (Human) |
| kaempferol | P09960 | LKHA4_HUMAN | Homo sapiens (Human) |
| kaempferol | P20248 | CCNA2_HUMAN | Homo sapiens (Human) |
| kaempferol | P45452 | MMP13_HUMAN | Homo sapiens (Human) |
| kaempferol | P55210 | CASP7_HUMAN | Homo sapiens (Human) |
| kaempferol | P04278 | SHBG_HUMAN  | Homo sapiens (Human) |
| kaempferol | P08254 | MMP3_HUMAN  | Homo sapiens (Human) |
| kaempferol | P35558 | PCKGC_HUMAN | Homo sapiens (Human) |
| taxifolin  | P43166 | CAH7_HUMAN  | Homo sapiens (Human) |
| taxifolin  | O43570 | CAH12_HUMAN | Homo sapiens (Human) |
| taxifolin  | P22748 | CAH4_HUMAN  | Homo sapiens (Human) |
| taxifolin  | P39900 | MMP12_HUMAN | Homo sapiens (Human) |
| taxifolin  | P11309 | PIM1_HUMAN  | Homo sapiens (Human) |

|           |        |             |                      |
|-----------|--------|-------------|----------------------|
| taxifolin | P00918 | CAH2_HUMAN  | Homo sapiens (Human) |
| taxifolin | P11511 | CP19A_HUMAN | Homo sapiens (Human) |
| taxifolin | P00734 | THRB_HUMAN  | Homo sapiens (Human) |
| taxifolin | P10275 | ANDR_HUMAN  | Homo sapiens (Human) |
| taxifolin | P08631 | HCK_HUMAN   | Homo sapiens (Human) |
| taxifolin | P00915 | CAH1_HUMAN  | Homo sapiens (Human) |
| taxifolin | P06276 | CHLE_HUMAN  | Homo sapiens (Human) |
| taxifolin | P00751 | CFAB_HUMAN  | Homo sapiens (Human) |
| taxifolin | P03372 | ESR1_HUMAN  | Homo sapiens (Human) |
| taxifolin | P00491 | PNPH_HUMAN  | Homo sapiens (Human) |
| taxifolin | P24941 | CDK2_HUMAN  | Homo sapiens (Human) |
| taxifolin | P62937 | PPIA_HUMAN  | Homo sapiens (Human) |
| taxifolin | P02766 | TTHY_HUMAN  | Homo sapiens (Human) |
| taxifolin | P06401 | PRGR_HUMAN  | Homo sapiens (Human) |
| taxifolin | P53779 | MK10_HUMAN  | Homo sapiens (Human) |
| taxifolin | P09211 | GSTP1_HUMAN | Homo sapiens (Human) |
| taxifolin | P00390 | GSHR_HUMAN  | Homo sapiens (Human) |
| taxifolin | P45983 | MK08_HUMAN  | Homo sapiens (Human) |
| taxifolin | P00533 | EGFR_HUMAN  | Homo sapiens (Human) |
| taxifolin | Q12884 | SEPR_HUMAN  | Homo sapiens (Human) |
| taxifolin | Q00534 | CDK6_HUMAN  | Homo sapiens (Human) |
| taxifolin | P48736 | PK3CG_HUMAN | Homo sapiens (Human) |
| taxifolin | Q16740 | CLPP_HUMAN  | Homo sapiens (Human) |
| taxifolin | P08842 | STS_HUMAN   | Homo sapiens (Human) |
| taxifolin | P02652 | APOA2_HUMAN | Homo sapiens (Human) |
| taxifolin | P56817 | BACE1_HUMAN | Homo sapiens (Human) |
| taxifolin | P02768 | ALBU_HUMAN  | Homo sapiens (Human) |
| taxifolin | P04062 | GLCM_HUMAN  | Homo sapiens (Human) |
| taxifolin | P25774 | CATS_HUMAN  | Homo sapiens (Human) |
| taxifolin | Q9NP99 | TREM1_HUMAN | Homo sapiens (Human) |
| taxifolin | P08254 | MMP3_HUMAN  | Homo sapiens (Human) |
| taxifolin | P35968 | VGFR2_HUMAN | Homo sapiens (Human) |
| taxifolin | Q00796 | DHSO_HUMAN  | Homo sapiens (Human) |
| taxifolin | P20248 | CCNA2_HUMAN | Homo sapiens (Human) |
| taxifolin | Q15078 | CD5R1_HUMAN | Homo sapiens (Human) |
| taxifolin | P00749 | UROK_HUMAN  | Homo sapiens (Human) |
| taxifolin | O14757 | CHK1_HUMAN  | Homo sapiens (Human) |
| taxifolin | O15496 | PA2GX_HUMAN | Homo sapiens (Human) |
| taxifolin | P54760 | EPHB4_HUMAN | Homo sapiens (Human) |
| taxifolin | P04278 | SHBG_HUMAN  | Homo sapiens (Human) |
| taxifolin | P03950 | ANGI_HUMAN  | Homo sapiens (Human) |
| taxifolin | O14965 | AURKA_HUMAN | Homo sapiens (Human) |
| taxifolin | P80188 | NGAL_HUMAN  | Homo sapiens (Human) |
| taxifolin | O15382 | BCAT2_HUMAN | Homo sapiens (Human) |
| taxifolin | P29474 | NOS3_HUMAN  | Homo sapiens (Human) |
| taxifolin | P00439 | PH4H_HUMAN  | Homo sapiens (Human) |
| taxifolin | P62508 | ERR3_HUMAN  | Homo sapiens (Human) |
| taxifolin | Q08499 | PDE4D_HUMAN | Homo sapiens (Human) |
| taxifolin | P11142 | HSP7C_HUMAN | Homo sapiens (Human) |
| taxifolin | P12931 | SRC_HUMAN   | Homo sapiens (Human) |
| taxifolin | P27338 | AOFB_HUMAN  | Homo sapiens (Human) |
| taxifolin | P04745 | AMY1_HUMAN  | Homo sapiens (Human) |
| taxifolin | Q07343 | PDE4B_HUMAN | Homo sapiens (Human) |
| taxifolin | P78536 | ADA17_HUMAN | Homo sapiens (Human) |
| taxifolin | P78368 | KC1G2_HUMAN | Homo sapiens (Human) |
| taxifolin | P08758 | ANXA5_HUMAN | Homo sapiens (Human) |
| taxifolin | P16152 | CBR1_HUMAN  | Homo sapiens (Human) |
| taxifolin | P14061 | DHB1_HUMAN  | Homo sapiens (Human) |

|                |        |             |                      |
|----------------|--------|-------------|----------------------|
| taxifolin      | Q16828 | DUS6_HUMAN  | Homo sapiens (Human) |
| taxifolin      | P19793 | RXRA_HUMAN  | Homo sapiens (Human) |
| taxifolin      | P06737 | PYGL_HUMAN  | Homo sapiens (Human) |
| taxifolin      | P17707 | DCAM_HUMAN  | Homo sapiens (Human) |
| taxifolin      | P15559 | NQO1_HUMAN  | Homo sapiens (Human) |
| taxifolin      | P17342 | ANPRC_HUMAN | Homo sapiens (Human) |
| taxifolin      | P47929 | LEG7_HUMAN  | Homo sapiens (Human) |
| taxifolin      | P07900 | HS90A_HUMAN | Homo sapiens (Human) |
| taxifolin      | P55055 | NR1H2_HUMAN | Homo sapiens (Human) |
| taxifolin      | P15121 | ALDR_HUMAN  | Homo sapiens (Human) |
| taxifolin      | P18075 | BMP7_HUMAN  | Homo sapiens (Human) |
| taxifolin      | P19971 | TYPH_HUMAN  | Homo sapiens (Human) |
| taxifolin      | P45452 | MMP13_HUMAN | Homo sapiens (Human) |
| taxifolin      | Q13126 | MTAP_HUMAN  | Homo sapiens (Human) |
| taxifolin      | P11766 | ADHX_HUMAN  | Homo sapiens (Human) |
| taxifolin      | Q16539 | MK14_HUMAN  | Homo sapiens (Human) |
| taxifolin      | O15530 | PDPK1_HUMAN | Homo sapiens (Human) |
| taxifolin      | P55210 | CASP7_HUMAN | Homo sapiens (Human) |
| taxifolin      | P07858 | CATB_HUMAN  | Homo sapiens (Human) |
| taxifolin      | P00374 | DYR_HUMAN   | Homo sapiens (Human) |
| taxifolin      | Q15382 | RHEB_HUMAN  | Homo sapiens (Human) |
| taxifolin      | Q06520 | ST2A1_HUMAN | Homo sapiens (Human) |
| taxifolin      | P27707 | DCK_HUMAN   | Homo sapiens (Human) |
| taxifolin      | P02774 | VTDB_HUMAN  | Homo sapiens (Human) |
| taxifolin      | P28845 | DH11_HUMAN  | Homo sapiens (Human) |
| taxifolin      | P23141 | EST1_HUMAN  | Homo sapiens (Human) |
| taxifolin      | P23526 | SAHH_HUMAN  | Homo sapiens (Human) |
| taxifolin      | P00746 | CFAD_HUMAN  | Homo sapiens (Human) |
| taxifolin      | P01709 | LV208_HUMAN | Homo sapiens (Human) |
| taxifolin      | P52732 | KIF11_HUMAN | Homo sapiens (Human) |
| taxifolin      | P09960 | LKHA4_HUMAN | Homo sapiens (Human) |
| taxifolin      | P08235 | MCR_HUMAN   | Homo sapiens (Human) |
| taxifolin      | P00742 | FA10_HUMAN  | Homo sapiens (Human) |
| Lucidumoside D | P45983 | MK08_HUMAN  | Homo sapiens (Human) |
| Lucidumoside D | P08631 | HCK_HUMAN   | Homo sapiens (Human) |
| Lucidumoside D | P53779 | MK10_HUMAN  | Homo sapiens (Human) |
| Lucidumoside D | P09211 | GSTP1_HUMAN | Homo sapiens (Human) |
| Lucidumoside D | P00918 | CAH2_HUMAN  | Homo sapiens (Human) |
| Lucidumoside D | P07339 | CATD_HUMAN  | Homo sapiens (Human) |
| Lucidumoside D | P08254 | MMP3_HUMAN  | Homo sapiens (Human) |
| Lucidumoside D | P24941 | CDK2_HUMAN  | Homo sapiens (Human) |
| Lucidumoside D | P55055 | NR1H2_HUMAN | Homo sapiens (Human) |
| Lucidumoside D | Q9BW91 | NUDT9_HUMAN | Homo sapiens (Human) |
| Lucidumoside D | P62942 | FKB1A_HUMAN | Homo sapiens (Human) |
| Lucidumoside D | P02766 | TTHY_HUMAN  | Homo sapiens (Human) |
| Lucidumoside D | P04062 | GLCM_HUMAN  | Homo sapiens (Human) |
| Lucidumoside D | O60911 | CATL2_HUMAN | Homo sapiens (Human) |
| Lucidumoside D | P00751 | CFAB_HUMAN  | Homo sapiens (Human) |
| Lucidumoside D | P53582 | MAP11_HUMAN | Homo sapiens (Human) |
| Lucidumoside D | P06276 | CHLE_HUMAN  | Homo sapiens (Human) |
| Lucidumoside D | P62937 | PPIA_HUMAN  | Homo sapiens (Human) |
| Lucidumoside D | P26196 | DDX6_HUMAN  | Homo sapiens (Human) |
| Lucidumoside D | Q9NP99 | TREM1_HUMAN | Homo sapiens (Human) |
| Lucidumoside D | O14757 | CHK1_HUMAN  | Homo sapiens (Human) |
| Lucidumoside D | P37173 | TGFR2_HUMAN | Homo sapiens (Human) |
| Lucidumoside D | Q12884 | SEPR_HUMAN  | Homo sapiens (Human) |
| Lucidumoside D | P00915 | CAH1_HUMAN  | Homo sapiens (Human) |
| Lucidumoside D | P00491 | PNPH_HUMAN  | Homo sapiens (Human) |

|                |        |             |                      |
|----------------|--------|-------------|----------------------|
| Lucidumoside D | P00533 | EGFR_HUMAN  | Homo sapiens (Human) |
| Lucidumoside D | P20248 | CCNA2_HUMAN | Homo sapiens (Human) |
| Lucidumoside D | P11309 | PIM1_HUMAN  | Homo sapiens (Human) |
| Lucidumoside D | Q13126 | MTAP_HUMAN  | Homo sapiens (Human) |
| Lucidumoside D | P23946 | CMA1_HUMAN  | Homo sapiens (Human) |
| Lucidumoside D | O14965 | AURKA_HUMAN | Homo sapiens (Human) |
| Lucidumoside D | P15121 | ALDR_HUMAN  | Homo sapiens (Human) |
| Lucidumoside D | P25774 | CATS_HUMAN  | Homo sapiens (Human) |
| Lucidumoside D | P49137 | MAPK2_HUMAN | Homo sapiens (Human) |
| Lucidumoside D | P37231 | PPARG_HUMAN | Homo sapiens (Human) |
| Lucidumoside D | P04745 | AMY1_HUMAN  | Homo sapiens (Human) |
| Lucidumoside D | Q07343 | PDE4B_HUMAN | Homo sapiens (Human) |
| Lucidumoside D | P00734 | THRB_HUMAN  | Homo sapiens (Human) |
| Lucidumoside D | P03372 | ESR1_HUMAN  | Homo sapiens (Human) |
| Lucidumoside D | O43570 | CAH12_HUMAN | Homo sapiens (Human) |
| Lucidumoside D | P45452 | MMP13_HUMAN | Homo sapiens (Human) |
| Lucidumoside D | P07858 | CATB_HUMAN  | Homo sapiens (Human) |
| Lucidumoside D | P52732 | KIF11_HUMAN | Homo sapiens (Human) |
| Lucidumoside D | P27338 | AOFB_HUMAN  | Homo sapiens (Human) |
| Lucidumoside D | P28482 | MK01_HUMAN  | Homo sapiens (Human) |
| Lucidumoside D | Q15078 | CD5R1_HUMAN | Homo sapiens (Human) |
| Lucidumoside D | P11142 | HSP7C_HUMAN | Homo sapiens (Human) |
| Lucidumoside D | P08842 | STS_HUMAN   | Homo sapiens (Human) |
| Lucidumoside D | Q92731 | ESR2_HUMAN  | Homo sapiens (Human) |
| Lucidumoside D | P06401 | PRGR_HUMAN  | Homo sapiens (Human) |
| Lucidumoside D | P48736 | PK3CG_HUMAN | Homo sapiens (Human) |
| Lucidumoside D | Q8NBQ5 | DHB11_HUMAN | Homo sapiens (Human) |
| Lucidumoside D | P25311 | ZA2G_HUMAN  | Homo sapiens (Human) |
| Lucidumoside D | Q9P2W7 | B3GA1_HUMAN | Homo sapiens (Human) |
| Lucidumoside D | P54760 | EPHB4_HUMAN | Homo sapiens (Human) |
| Lucidumoside D | P36897 | TGFR1_HUMAN | Homo sapiens (Human) |
| Lucidumoside D | P19367 | HXK1_HUMAN  | Homo sapiens (Human) |
| Lucidumoside D | Q05315 | LEG10_HUMAN | Homo sapiens (Human) |
| Lucidumoside D | P56817 | BACE1_HUMAN | Homo sapiens (Human) |
| Lucidumoside D | P08758 | ANXA5_HUMAN | Homo sapiens (Human) |
| Lucidumoside D | Q00796 | DHSO_HUMAN  | Homo sapiens (Human) |
| Lucidumoside D | P02652 | APOA2_HUMAN | Homo sapiens (Human) |
| Lucidumoside D | Q16539 | MK14_HUMAN  | Homo sapiens (Human) |
| Lucidumoside D | P51570 | GALK1_HUMAN | Homo sapiens (Human) |
| Lucidumoside D | P02768 | ALBU_HUMAN  | Homo sapiens (Human) |
| Lucidumoside D | P16083 | NQO2_HUMAN  | Homo sapiens (Human) |
| Lucidumoside D | P35968 | VGFR2_HUMAN | Homo sapiens (Human) |
| Lucidumoside D | P11511 | CP19A_HUMAN | Homo sapiens (Human) |
| Lucidumoside D | Q08499 | PDE4D_HUMAN | Homo sapiens (Human) |
| Lucidumoside D | Q02127 | PYRD_HUMAN  | Homo sapiens (Human) |
| Lucidumoside D | P12931 | SRC_HUMAN   | Homo sapiens (Human) |
| Lucidumoside D | P15056 | BRAF_HUMAN  | Homo sapiens (Human) |
| Lucidumoside D | P00374 | DYR_HUMAN   | Homo sapiens (Human) |
| Lucidumoside D | P02774 | VTDB_HUMAN  | Homo sapiens (Human) |
| Lucidumoside D | P00439 | PH4H_HUMAN  | Homo sapiens (Human) |
| Lucidumoside D | P03950 | ANGI_HUMAN  | Homo sapiens (Human) |
| Lucidumoside D | O15496 | PA2GX_HUMAN | Homo sapiens (Human) |
| Lucidumoside D | Q9NVS9 | PNPO_HUMAN  | Homo sapiens (Human) |
| Lucidumoside D | P78368 | KC1G2_HUMAN | Homo sapiens (Human) |
| Lucidumoside D | Q13231 | CHIT1_HUMAN | Homo sapiens (Human) |
| Lucidumoside D | P29474 | NOS3_HUMAN  | Homo sapiens (Human) |
| Lucidumoside D | P48449 | ERG7_HUMAN  | Homo sapiens (Human) |
| Lucidumoside D | P00736 | C1R_HUMAN   | Homo sapiens (Human) |

|                |        |             |                      |
|----------------|--------|-------------|----------------------|
| Lucidumoside D | P00746 | CFAD_HUMAN  | Homo sapiens (Human) |
| Lucidumoside D | P06737 | PYGL_HUMAN  | Homo sapiens (Human) |
| Lucidumoside D | P18031 | PTN1_HUMAN  | Homo sapiens (Human) |
| Lucidumoside D | P28845 | DHI1_HUMAN  | Homo sapiens (Human) |
| Lucidumoside D | P35398 | RORA_HUMAN  | Homo sapiens (Human) |
| Lucidumoside D | P02743 | SAMP_HUMAN  | Homo sapiens (Human) |
| Lucidumoside D | P53350 | PLK1_HUMAN  | Homo sapiens (Human) |
| Lucidumoside D | P01709 | LV208_HUMAN | Homo sapiens (Human) |
| Lucidumoside D | P04278 | SHBG_HUMAN  | Homo sapiens (Human) |
| Lucidumoside D | P14174 | MIF_HUMAN   | Homo sapiens (Human) |
| Lucidumoside D | P17707 | DCAM_HUMAN  | Homo sapiens (Human) |
| Lucidumoside D | Q99933 | BAG1_HUMAN  | Homo sapiens (Human) |
| Lucidumoside D | P47929 | LEG7_HUMAN  | Homo sapiens (Human) |
| Lucidumoside D | P07900 | HS90A_HUMAN | Homo sapiens (Human) |
| Lucidumoside D | P49354 | FNTA_HUMAN  | Homo sapiens (Human) |
| Lucidumoside D | P19793 | RXRA_HUMAN  | Homo sapiens (Human) |
| Lucidumoside D | P18075 | BMP7_HUMAN  | Homo sapiens (Human) |
| Lucidumoside D | P04818 | TYSY_HUMAN  | Homo sapiens (Human) |
| Lucidumoside D | P08069 | IGF1R_HUMAN | Homo sapiens (Human) |
| Lucidumoside D | O15382 | BCAT2_HUMAN | Homo sapiens (Human) |
| Lucidumoside D | P31749 | AKT1_HUMAN  | Homo sapiens (Human) |
| Lucidumoside D | P43235 | CATK_HUMAN  | Homo sapiens (Human) |
| Lucidumoside D | P39900 | MMP12_HUMAN | Homo sapiens (Human) |
| Lucidumoside D | P00742 | FA10_HUMAN  | Homo sapiens (Human) |
| Lucidumoside D | P00390 | GSHR_HUMAN  | Homo sapiens (Human) |
| Lucidumoside D | P42330 | AK1C3_HUMAN | Homo sapiens (Human) |
| Lucidumoside D | P23141 | EST1_HUMAN  | Homo sapiens (Human) |
| Lucidumoside D | Q96T66 | NMNA3_HUMAN | Homo sapiens (Human) |
| Lucidumoside D | P05451 | REG1A_HUMAN | Homo sapiens (Human) |
| Lucidumoside D | P19971 | TYPH_HUMAN  | Homo sapiens (Human) |
| Lucidumoside D | P11362 | FGFR1_HUMAN | Homo sapiens (Human) |
| Lucidumoside D | Q13370 | PDE3B_HUMAN | Homo sapiens (Human) |
| Lucidumoside D | P10275 | ANDR_HUMAN  | Homo sapiens (Human) |
| Lucidumoside D | P29218 | IMPA1_HUMAN | Homo sapiens (Human) |
| Lucidumoside D | P09874 | PARP1_HUMAN | Homo sapiens (Human) |
| Lucidumoside D | P00325 | ADH1B_HUMAN | Homo sapiens (Human) |
| Lucidumoside D | O76074 | PDE5A_HUMAN | Homo sapiens (Human) |
| Lucidumoside D | P04746 | AMYP_HUMAN  | Homo sapiens (Human) |
| Lucidumoside D | P15090 | FABP4_HUMAN | Homo sapiens (Human) |
| Lucidumoside D | Q96AZ6 | ISG20_HUMAN | Homo sapiens (Human) |
| Lucidumoside D | P55210 | CASP7_HUMAN | Homo sapiens (Human) |
| Lucidumoside D | P23919 | KTHY_HUMAN  | Homo sapiens (Human) |
| Lucidumoside D | O15530 | PDPK1_HUMAN | Homo sapiens (Human) |
| Lucidumoside D | P43155 | CACP_HUMAN  | Homo sapiens (Human) |
| Lucidumoside D | P06239 | LCK_HUMAN   | Homo sapiens (Human) |
| Lucidumoside D | P49789 | FHIT_HUMAN  | Homo sapiens (Human) |
| Lucidumoside D | P50579 | MAP2_HUMAN  | Homo sapiens (Human) |
| Lucidumoside D | P11712 | CP2C9_HUMAN | Homo sapiens (Human) |
| Lucidumoside D | P84077 | ARF1_HUMAN  | Homo sapiens (Human) |
| Lucidumoside D | Q03181 | PPARD_HUMAN | Homo sapiens (Human) |
| Lucidumoside D | P78536 | ADA17_HUMAN | Homo sapiens (Human) |
| Lucidumoside D | P00797 | RENI_HUMAN  | Homo sapiens (Human) |
| Lucidumoside D | P08581 | MET_HUMAN   | Homo sapiens (Human) |
| Lucidumoside D | P16152 | CBR1_HUMAN  | Homo sapiens (Human) |
| Lucidumoside D | Q15382 | RHEB_HUMAN  | Homo sapiens (Human) |
| Lucidumoside D | Q06520 | ST2A1_HUMAN | Homo sapiens (Human) |
| Lucidumoside D | P23526 | SAHH_HUMAN  | Homo sapiens (Human) |
| Lucidumoside D | P35558 | PCKGC_HUMAN | Homo sapiens (Human) |

|                |        |             |                      |
|----------------|--------|-------------|----------------------|
| Lucidumoside D | P15559 | NQO1_HUMAN  | Homo sapiens (Human) |
| Lucidumoside D | P61586 | RHOA_HUMAN  | Homo sapiens (Human) |
| Lucidumoside D | P11586 | C1TC_HUMAN  | Homo sapiens (Human) |
| Lucidumoside D | P16442 | BGAT_HUMAN  | Homo sapiens (Human) |
| Lucidumoside D | O43252 | PAPS1_HUMAN | Homo sapiens (Human) |
| Lucidumoside D | P27487 | DPP4_HUMAN  | Homo sapiens (Human) |
| Lucidumoside D | P22894 | MMP8_HUMAN  | Homo sapiens (Human) |
| Lucidumoside D | P52333 | JAK3_HUMAN  | Homo sapiens (Human) |
| Lucidumoside D | Q08881 | ITK_HUMAN   | Homo sapiens (Human) |
| Lucidumoside D | P08235 | MCR_HUMAN   | Homo sapiens (Human) |
| Lucidumoside D | Q07912 | ACK1_HUMAN  | Homo sapiens (Human) |
| Lucidumoside D | P34896 | GLYC_HUMAN  | Homo sapiens (Human) |
| Lucidumoside D | Q9BY41 | HDAC8_HUMAN | Homo sapiens (Human) |
| Lucidumoside D | P15153 | RAC2_HUMAN  | Homo sapiens (Human) |
| Lucidumoside D | P05019 | IGF1_HUMAN  | Homo sapiens (Human) |
| Lucidumoside D | P01009 | A1AT_HUMAN  | Homo sapiens (Human) |
| Lucidumoside D | P04035 | HMDH_HUMAN  | Homo sapiens (Human) |
| Lucidumoside D | P49841 | GSK3B_HUMAN | Homo sapiens (Human) |
| Lucidumoside D | Q10588 | BST1_HUMAN  | Homo sapiens (Human) |
| Lucidumoside D | P05091 | ALDH2_HUMAN | Homo sapiens (Human) |
| eriodictyol    | P43166 | CAH7_HUMAN  | Homo sapiens (Human) |
| eriodictyol    | O43570 | CAH12_HUMAN | Homo sapiens (Human) |
| eriodictyol    | P22748 | CAH4_HUMAN  | Homo sapiens (Human) |
| eriodictyol    | Q16678 | CP1B1_HUMAN | Homo sapiens (Human) |
| eriodictyol    | P11511 | CP19A_HUMAN | Homo sapiens (Human) |
| eriodictyol    | P10275 | ANDR_HUMAN  | Homo sapiens (Human) |
| eriodictyol    | P00918 | CAH2_HUMAN  | Homo sapiens (Human) |
| eriodictyol    | P00734 | THRB_HUMAN  | Homo sapiens (Human) |
| eriodictyol    | P08631 | HCK_HUMAN   | Homo sapiens (Human) |
| eriodictyol    | P00915 | CAH1_HUMAN  | Homo sapiens (Human) |
| eriodictyol    | P06276 | CHLE_HUMAN  | Homo sapiens (Human) |
| eriodictyol    | P03372 | ESR1_HUMAN  | Homo sapiens (Human) |
| eriodictyol    | P24941 | CDK2_HUMAN  | Homo sapiens (Human) |
| eriodictyol    | P06401 | PRGR_HUMAN  | Homo sapiens (Human) |
| eriodictyol    | P56817 | BACE1_HUMAN | Homo sapiens (Human) |
| eriodictyol    | P00390 | GSHR_HUMAN  | Homo sapiens (Human) |
| eriodictyol    | P48736 | PK3CG_HUMAN | Homo sapiens (Human) |
| eriodictyol    | P11309 | PIM1_HUMAN  | Homo sapiens (Human) |
| eriodictyol    | Q12884 | SEPR_HUMAN  | Homo sapiens (Human) |
| eriodictyol    | P00491 | PNPH_HUMAN  | Homo sapiens (Human) |
| eriodictyol    | P00533 | EGFR_HUMAN  | Homo sapiens (Human) |
| eriodictyol    | P08842 | STS_HUMAN   | Homo sapiens (Human) |
| eriodictyol    | P02652 | APOA2_HUMAN | Homo sapiens (Human) |
| eriodictyol    | P20248 | CCNA2_HUMAN | Homo sapiens (Human) |
| eriodictyol    | Q00534 | CDK6_HUMAN  | Homo sapiens (Human) |
| eriodictyol    | P00751 | CFAB_HUMAN  | Homo sapiens (Human) |
| eriodictyol    | P02768 | ALBU_HUMAN  | Homo sapiens (Human) |
| eriodictyol    | P53779 | MK10_HUMAN  | Homo sapiens (Human) |
| eriodictyol    | P09211 | GSTP1_HUMAN | Homo sapiens (Human) |
| eriodictyol    | P07339 | CATD_HUMAN  | Homo sapiens (Human) |
| eriodictyol    | Q16740 | CLPP_HUMAN  | Homo sapiens (Human) |
| eriodictyol    | P45983 | MK08_HUMAN  | Homo sapiens (Human) |
| eriodictyol    | P04062 | GLCM_HUMAN  | Homo sapiens (Human) |
| eriodictyol    | P35968 | VGFR2_HUMAN | Homo sapiens (Human) |
| eriodictyol    | P62508 | ERR3_HUMAN  | Homo sapiens (Human) |
| eriodictyol    | Q00796 | DHSO_HUMAN  | Homo sapiens (Human) |
| eriodictyol    | P02766 | TTHY_HUMAN  | Homo sapiens (Human) |
| eriodictyol    | P54760 | EPHB4_HUMAN | Homo sapiens (Human) |



|               |        |             |                      |
|---------------|--------|-------------|----------------------|
| eriodictyol   | O14757 | CHK1_HUMAN  | Homo sapiens (Human) |
| eriodictyol   | P78536 | ADA17_HUMAN | Homo sapiens (Human) |
| eriodictyol   | P03950 | ANGI_HUMAN  | Homo sapiens (Human) |
| eriodictyol   | O14965 | AURKA_HUMAN | Homo sapiens (Human) |
| eriodictyol   | O15382 | BCAT2_HUMAN | Homo sapiens (Human) |
| eriodictyol   | P29474 | NOS3_HUMAN  | Homo sapiens (Human) |
| eriodictyol   | P00439 | PH4H_HUMAN  | Homo sapiens (Human) |
| eriodictyol   | P14061 | DHB1_HUMAN  | Homo sapiens (Human) |
| eriodictyol   | P04745 | AMY1_HUMAN  | Homo sapiens (Human) |
| eriodictyol   | P27338 | AOFB_HUMAN  | Homo sapiens (Human) |
| eriodictyol   | P11142 | HSP7C_HUMAN | Homo sapiens (Human) |
| eriodictyol   | P16152 | CBR1_HUMAN  | Homo sapiens (Human) |
| eriodictyol   | P04278 | SHBG_HUMAN  | Homo sapiens (Human) |
| eriodictyol   | Q13126 | MTAP_HUMAN  | Homo sapiens (Human) |
| eriodictyol   | P78368 | KC1G2_HUMAN | Homo sapiens (Human) |
| eriodictyol   | Q08499 | PDE4D_HUMAN | Homo sapiens (Human) |
| eriodictyol   | P08758 | ANXA5_HUMAN | Homo sapiens (Human) |
| eriodictyol   | P06737 | PYGL_HUMAN  | Homo sapiens (Human) |
| eriodictyol   | P14174 | MIF_HUMAN   | Homo sapiens (Human) |
| eriodictyol   | P19793 | RXRA_HUMAN  | Homo sapiens (Human) |
| eriodictyol   | Q16828 | DUS6_HUMAN  | Homo sapiens (Human) |
| eriodictyol   | P07900 | HS90A_HUMAN | Homo sapiens (Human) |
| eriodictyol   | P15559 | NQO1_HUMAN  | Homo sapiens (Human) |
| eriodictyol   | Q16539 | MK14_HUMAN  | Homo sapiens (Human) |
| eriodictyol   | P45452 | MMP13_HUMAN | Homo sapiens (Human) |
| eriodictyol   | P15121 | ALDR_HUMAN  | Homo sapiens (Human) |
| eriodictyol   | P28845 | DHI1_HUMAN  | Homo sapiens (Human) |
| eriodictyol   | P18075 | BMP7_HUMAN  | Homo sapiens (Human) |
| eriodictyol   | O15496 | PA2GX_HUMAN | Homo sapiens (Human) |
| eriodictyol   | P11766 | ADHX_HUMAN  | Homo sapiens (Human) |
| eriodictyol   | P53350 | PLK1_HUMAN  | Homo sapiens (Human) |
| eriodictyol   | P12931 | SRC_HUMAN   | Homo sapiens (Human) |
| eriodictyol   | P17707 | DCAM_HUMAN  | Homo sapiens (Human) |
| eriodictyol   | P11362 | FGFR1_HUMAN | Homo sapiens (Human) |
| eriodictyol   | O15530 | PDPK1_HUMAN | Homo sapiens (Human) |
| eriodictyol   | P23141 | EST1_HUMAN  | Homo sapiens (Human) |
| eriodictyol   | P31749 | AKT1_HUMAN  | Homo sapiens (Human) |
| eriodictyol   | P02774 | VTDB_HUMAN  | Homo sapiens (Human) |
| eriodictyol   | P00374 | DYR_HUMAN   | Homo sapiens (Human) |
| eriodictyol   | Q06520 | ST2A1_HUMAN | Homo sapiens (Human) |
| eriodictyol   | P00742 | FA10_HUMAN  | Homo sapiens (Human) |
| eriodictyol   | P00746 | CFAD_HUMAN  | Homo sapiens (Human) |
| eriodictyol   | P04818 | TYSY_HUMAN  | Homo sapiens (Human) |
| eriodictyol   | Q9BY41 | HDAC8_HUMAN | Homo sapiens (Human) |
| eriodictyol   | P52732 | KIF11_HUMAN | Homo sapiens (Human) |
| eriodictyol   | P54577 | SYYC_HUMAN  | Homo sapiens (Human) |
| eriodictyol   | Q03181 | PPARD_HUMAN | Homo sapiens (Human) |
| eriodictyol   | Q07343 | PDE4B_HUMAN | Homo sapiens (Human) |
| Lucidusculine | P52732 | KIF11_HUMAN | Homo sapiens (Human) |
| Lucidusculine | P12643 | BMP2_HUMAN  | Homo sapiens (Human) |
| Lucidusculine | P02652 | APOA2_HUMAN | Homo sapiens (Human) |
| Lucidusculine | P02768 | ALBU_HUMAN  | Homo sapiens (Human) |
| Lucidusculine | P52895 | AK1C2_HUMAN | Homo sapiens (Human) |
| Lucidusculine | P08842 | STS_HUMAN   | Homo sapiens (Human) |
| Lucidusculine | P00918 | CAH2_HUMAN  | Homo sapiens (Human) |
| Lucidusculine | P11309 | PIM1_HUMAN  | Homo sapiens (Human) |
| Lucidusculine | P20248 | CCNA2_HUMAN | Homo sapiens (Human) |
| Lucidusculine | P62937 | PPIA_HUMAN  | Homo sapiens (Human) |

|               |        |             |                      |
|---------------|--------|-------------|----------------------|
| Lucidusculine | P03372 | ESR1_HUMAN  | Homo sapiens (Human) |
| Lucidusculine | P53779 | MK10_HUMAN  | Homo sapiens (Human) |
| Lucidusculine | P00751 | CFAB_HUMAN  | Homo sapiens (Human) |
| Lucidusculine | P02766 | TTHY_HUMAN  | Homo sapiens (Human) |
| Lucidusculine | P02774 | VTDB_HUMAN  | Homo sapiens (Human) |
| Lucidusculine | P45983 | MK08_HUMAN  | Homo sapiens (Human) |
| Lucidusculine | P35398 | RORA_HUMAN  | Homo sapiens (Human) |
| Lucidusculine | O76054 | S14L2_HUMAN | Homo sapiens (Human) |
| Lucidusculine | P56817 | BACE1_HUMAN | Homo sapiens (Human) |
| Lucidusculine | P28482 | MK01_HUMAN  | Homo sapiens (Human) |
| Lucidusculine | P11086 | PNMT_HUMAN  | Homo sapiens (Human) |
| Lucidusculine | P20701 | ITAL_HUMAN  | Homo sapiens (Human) |
| Lucidusculine | P78536 | ADA17_HUMAN | Homo sapiens (Human) |
| Lucidusculine | Q08499 | PDE4D_HUMAN | Homo sapiens (Human) |
| Lucidusculine | Q16539 | MK14_HUMAN  | Homo sapiens (Human) |
| Lucidusculine | P06401 | PRGR_HUMAN  | Homo sapiens (Human) |
| Lucidusculine | P14061 | DHB1_HUMAN  | Homo sapiens (Human) |
| Lucidusculine | P10275 | ANDR_HUMAN  | Homo sapiens (Human) |
| Lucidusculine | P54760 | EPHB4_HUMAN | Homo sapiens (Human) |
| Lucidusculine | P35968 | VGFR2_HUMAN | Homo sapiens (Human) |
| Lucidusculine | P0DP23 | CALM1_HUMAN | Homo sapiens (Human) |
| Lucidusculine | P0DP24 | CALM2_HUMAN | Homo sapiens (Human) |
| Lucidusculine | P0DP25 | CALM3_HUMAN | Homo sapiens (Human) |
| Lucidusculine | P49841 | GSK3B_HUMAN | Homo sapiens (Human) |
| Lucidusculine | Q06124 | PTN11_HUMAN | Homo sapiens (Human) |
| Lucidusculine | P24941 | CDK2_HUMAN  | Homo sapiens (Human) |
| Lucidusculine | P00734 | THRB_HUMAN  | Homo sapiens (Human) |
| Lucidusculine | Q07343 | PDE4B_HUMAN | Homo sapiens (Human) |
| Lucidusculine | P34913 | HYES_HUMAN  | Homo sapiens (Human) |
| Lucidusculine | P28845 | DH11_HUMAN  | Homo sapiens (Human) |
| Lucidusculine | Q06520 | ST2A1_HUMAN | Homo sapiens (Human) |
| Lucidusculine | P53041 | PPP5_HUMAN  | Homo sapiens (Human) |
| Lucidusculine | P42768 | WASP_HUMAN  | Homo sapiens (Human) |
| Lucidusculine | Q00987 | MDM2_HUMAN  | Homo sapiens (Human) |
| Lucidusculine | P06276 | CHLE_HUMAN  | Homo sapiens (Human) |
| Lucidusculine | Q16828 | DUS6_HUMAN  | Homo sapiens (Human) |
| Lucidusculine | P00746 | CFAD_HUMAN  | Homo sapiens (Human) |
| Lucidusculine | Q9BY41 | HDAC8_HUMAN | Homo sapiens (Human) |
| Lucidusculine | P08758 | ANXA5_HUMAN | Homo sapiens (Human) |
| Lucidusculine | P08254 | MMP3_HUMAN  | Homo sapiens (Human) |
| Lucidusculine | P55210 | CASP7_HUMAN | Homo sapiens (Human) |
| Lucidusculine | P00390 | GSHR_HUMAN  | Homo sapiens (Human) |
| Lucidusculine | P00325 | ADH1B_HUMAN | Homo sapiens (Human) |
| Lucidusculine | P29474 | NOS3_HUMAN  | Homo sapiens (Human) |
| Lucidusculine | P11766 | ADHX_HUMAN  | Homo sapiens (Human) |
| Lucidusculine | P62508 | ERR3_HUMAN  | Homo sapiens (Human) |
| Lucidusculine | P00491 | PNPH_HUMAN  | Homo sapiens (Human) |
| Lucidusculine | P04278 | SHBG_HUMAN  | Homo sapiens (Human) |
| Lucidusculine | P04179 | SODM_HUMAN  | Homo sapiens (Human) |
| Lucidusculine | P15121 | ALDR_HUMAN  | Homo sapiens (Human) |
| Lucidusculine | P27338 | AOFB_HUMAN  | Homo sapiens (Human) |
| Lucidusculine | P15559 | NQO1_HUMAN  | Homo sapiens (Human) |
| Lucidusculine | P12931 | SRC_HUMAN   | Homo sapiens (Human) |
| Lucidusculine | P45452 | MMP13_HUMAN | Homo sapiens (Human) |
| Lucidusculine | Q04828 | AK1C1_HUMAN | Homo sapiens (Human) |
| Lucidusculine | P00533 | EGFR_HUMAN  | Homo sapiens (Human) |
| Lucidusculine | P09211 | GSTP1_HUMAN | Homo sapiens (Human) |
| Lucidusculine | P54577 | SYYC_HUMAN  | Homo sapiens (Human) |

|               |        |             |                      |
|---------------|--------|-------------|----------------------|
| Lucidusculine | O14757 | CHK1_HUMAN  | Homo sapiens (Human) |
| Lucidusculine | O15530 | PDPK1_HUMAN | Homo sapiens (Human) |
| Lucidusculine | P30043 | BLVRB_HUMAN | Homo sapiens (Human) |
| Lucidusculine | P21802 | FGFR2_HUMAN | Homo sapiens (Human) |
| Lucidusculine | P08581 | MET_HUMAN   | Homo sapiens (Human) |
| Lucidusculine | P50579 | MAP2_HUMAN  | Homo sapiens (Human) |
| Lucidusculine | P18031 | PTN1_HUMAN  | Homo sapiens (Human) |
| Lucidusculine | Q16773 | KAT1_HUMAN  | Homo sapiens (Human) |
| Lucidusculine | P00747 | PLMN_HUMAN  | Homo sapiens (Human) |
| Lucidusculine | P49638 | TTPA_HUMAN  | Homo sapiens (Human) |
| Lucidusculine | P00326 | ADH1G_HUMAN | Homo sapiens (Human) |
| Lucidusculine | O43617 | TPPC3_HUMAN | Homo sapiens (Human) |
| Lucidusculine | P03950 | ANGI_HUMAN  | Homo sapiens (Human) |
| Lucidusculine | P00742 | FA10_HUMAN  | Homo sapiens (Human) |
| Lucidusculine | P49366 | DHYS_HUMAN  | Homo sapiens (Human) |
| Lucidusculine | P08263 | GSTA1_HUMAN | Homo sapiens (Human) |
| Lucidusculine | P00374 | DYR_HUMAN   | Homo sapiens (Human) |
| Lucidusculine | P55263 | ADK_HUMAN   | Homo sapiens (Human) |
| Lucidusculine | P08235 | MCR_HUMAN   | Homo sapiens (Human) |
| Lucidusculine | P11712 | CP2C9_HUMAN | Homo sapiens (Human) |
| Lucidusculine | P07900 | HS90A_HUMAN | Homo sapiens (Human) |
| Lucidusculine | P04818 | TYSY_HUMAN  | Homo sapiens (Human) |
| Lucidusculine | P27487 | DPP4_HUMAN  | Homo sapiens (Human) |
| Lucidusculine | P01009 | A1AT_HUMAN  | Homo sapiens (Human) |
| Lucidusculine | P08709 | FA7_HUMAN   | Homo sapiens (Human) |
| Lucidusculine | P10828 | THB_HUMAN   | Homo sapiens (Human) |
| Lucidusculine | Q02127 | PYRD_HUMAN  | Homo sapiens (Human) |
| Lucidusculine | Q96RI1 | NR1H4_HUMAN | Homo sapiens (Human) |
| Lucidusculine | P36897 | TGFR1_HUMAN | Homo sapiens (Human) |
| Lucidusculine | P43405 | KSYK_HUMAN  | Homo sapiens (Human) |
| Lucidusculine | O15496 | PA2GX_HUMAN | Homo sapiens (Human) |
| Lucidusculine | Q14541 | HNF4G_HUMAN | Homo sapiens (Human) |
| Lucidusculine | P52333 | JAK3_HUMAN  | Homo sapiens (Human) |
| Lucidusculine | P55055 | NR1H2_HUMAN | Homo sapiens (Human) |
| Lucidusculine | Q13133 | NR1H3_HUMAN | Homo sapiens (Human) |
| Lucidusculine | Q08881 | ITK_HUMAN   | Homo sapiens (Human) |
| Lucidusculine | P37231 | PPARG_HUMAN | Homo sapiens (Human) |
| Lucidusculine | P06239 | LCK_HUMAN   | Homo sapiens (Human) |
| Lucidusculine | P00439 | PH4H_HUMAN  | Homo sapiens (Human) |
| Lucidusculine | P08069 | IGF1R_HUMAN | Homo sapiens (Human) |
| Lucidusculine | O75469 | NR1I2_HUMAN | Homo sapiens (Human) |
| Lucidusculine | P49354 | FNTA_HUMAN  | Homo sapiens (Human) |
| Lucidusculine | P08246 | ELNE_HUMAN  | Homo sapiens (Human) |
| Lucidusculine | P49763 | PLGF_HUMAN  | Homo sapiens (Human) |
| Lucidusculine | P42330 | AK1C3_HUMAN | Homo sapiens (Human) |
| Olitoriside   | P09211 | GSTP1_HUMAN | Homo sapiens (Human) |
| Olitoriside   | P28482 | MK01_HUMAN  | Homo sapiens (Human) |
| Olitoriside   | Q9NP99 | TREM1_HUMAN | Homo sapiens (Human) |
| Olitoriside   | P08842 | STS_HUMAN   | Homo sapiens (Human) |
| Olitoriside   | P25774 | CATS_HUMAN  | Homo sapiens (Human) |
| Olitoriside   | Q9BW91 | NUDT9_HUMAN | Homo sapiens (Human) |
| Olitoriside   | P00918 | CAH2_HUMAN  | Homo sapiens (Human) |
| Olitoriside   | P02652 | APOA2_HUMAN | Homo sapiens (Human) |
| Olitoriside   | P07339 | CATD_HUMAN  | Homo sapiens (Human) |
| Olitoriside   | P42330 | AK1C3_HUMAN | Homo sapiens (Human) |
| Olitoriside   | Q12884 | SEPR_HUMAN  | Homo sapiens (Human) |
| Olitoriside   | P53582 | MAP11_HUMAN | Homo sapiens (Human) |
| Olitoriside   | P37173 | TGFR2_HUMAN | Homo sapiens (Human) |

|             |        |             |                      |
|-------------|--------|-------------|----------------------|
| Olitoriside | P04745 | AMY1_HUMAN  | Homo sapiens (Human) |
| Olitoriside | P08254 | MMP3_HUMAN  | Homo sapiens (Human) |
| Olitoriside | P42574 | CASP3_HUMAN | Homo sapiens (Human) |
| Olitoriside | O14965 | AURKA_HUMAN | Homo sapiens (Human) |
| Olitoriside | P04062 | GLCM_HUMAN  | Homo sapiens (Human) |
| Olitoriside | O14757 | CHK1_HUMAN  | Homo sapiens (Human) |
| Olitoriside | P62937 | PPIA_HUMAN  | Homo sapiens (Human) |
| Olitoriside | P00491 | PNPH_HUMAN  | Homo sapiens (Human) |
| Olitoriside | P53779 | MK10_HUMAN  | Homo sapiens (Human) |
| Olitoriside | P13598 | ICAM2_HUMAN | Homo sapiens (Human) |
| Olitoriside | P02768 | ALBU_HUMAN  | Homo sapiens (Human) |
| Olitoriside | P00533 | EGFR_HUMAN  | Homo sapiens (Human) |
| Olitoriside | Q07343 | PDE4B_HUMAN | Homo sapiens (Human) |
| Olitoriside | P00915 | CAH1_HUMAN  | Homo sapiens (Human) |
| Olitoriside | P27338 | AOFB_HUMAN  | Homo sapiens (Human) |
| Olitoriside | P06276 | CHLE_HUMAN  | Homo sapiens (Human) |
| Olitoriside | Q92731 | ESR2_HUMAN  | Homo sapiens (Human) |
| Olitoriside | P02766 | TTHY_HUMAN  | Homo sapiens (Human) |
| Olitoriside | Q16539 | MK14_HUMAN  | Homo sapiens (Human) |
| Olitoriside | P11142 | HSP7C_HUMAN | Homo sapiens (Human) |
| Olitoriside | Q13126 | MTAP_HUMAN  | Homo sapiens (Human) |
| Olitoriside | Q8NBQ5 | DHB11_HUMAN | Homo sapiens (Human) |
| Olitoriside | Q05315 | LEG10_HUMAN | Homo sapiens (Human) |
| Olitoriside | P24941 | CDK2_HUMAN  | Homo sapiens (Human) |
| Olitoriside | P62942 | FKB1A_HUMAN | Homo sapiens (Human) |
| Olitoriside | P23141 | EST1_HUMAN  | Homo sapiens (Human) |
| Olitoriside | P12643 | BMP2_HUMAN  | Homo sapiens (Human) |
| Olitoriside | O43570 | CAH12_HUMAN | Homo sapiens (Human) |
| Olitoriside | P37231 | PPARG_HUMAN | Homo sapiens (Human) |
| Olitoriside | P49137 | MAPK2_HUMAN | Homo sapiens (Human) |
| Olitoriside | O60911 | CATL2_HUMAN | Homo sapiens (Human) |
| Olitoriside | Q9BZR6 | RTN4R_HUMAN | Homo sapiens (Human) |
| Olitoriside | P55055 | NR1H2_HUMAN | Homo sapiens (Human) |
| Olitoriside | P11309 | PIM1_HUMAN  | Homo sapiens (Human) |
| Olitoriside | P00751 | CFAB_HUMAN  | Homo sapiens (Human) |
| Olitoriside | P35968 | VGFR2_HUMAN | Homo sapiens (Human) |
| Olitoriside | P10275 | ANDR_HUMAN  | Homo sapiens (Human) |
| Olitoriside | P45983 | MK08_HUMAN  | Homo sapiens (Human) |
| Olitoriside | P07858 | CATB_HUMAN  | Homo sapiens (Human) |
| Olitoriside | P00749 | UROK_HUMAN  | Homo sapiens (Human) |
| Olitoriside | P54760 | EPHB4_HUMAN | Homo sapiens (Human) |
| Olitoriside | P26196 | DDX6_HUMAN  | Homo sapiens (Human) |
| Olitoriside | P06401 | PRGR_HUMAN  | Homo sapiens (Human) |
| Olitoriside | P56817 | BACE1_HUMAN | Homo sapiens (Human) |
| Olitoriside | P20248 | CCNA2_HUMAN | Homo sapiens (Human) |
| Olitoriside | P19367 | HXK1_HUMAN  | Homo sapiens (Human) |
| Olitoriside | P52895 | AK1C2_HUMAN | Homo sapiens (Human) |
| Olitoriside | P15121 | ALDR_HUMAN  | Homo sapiens (Human) |
| Olitoriside | P14061 | DHB1_HUMAN  | Homo sapiens (Human) |
| Olitoriside | P24071 | FCAR_HUMAN  | Homo sapiens (Human) |
| Olitoriside | P11511 | CP19A_HUMAN | Homo sapiens (Human) |
| Olitoriside | P52732 | KIF11_HUMAN | Homo sapiens (Human) |
| Olitoriside | P03950 | ANGI_HUMAN  | Homo sapiens (Human) |
| Olitoriside | Q13231 | CHIT1_HUMAN | Homo sapiens (Human) |
| Olitoriside | Q13370 | PDE3B_HUMAN | Homo sapiens (Human) |
| Olitoriside | P18075 | BMP7_HUMAN  | Homo sapiens (Human) |
| Olitoriside | P47929 | LEG7_HUMAN  | Homo sapiens (Human) |
| Olitoriside | P00746 | CFAD_HUMAN  | Homo sapiens (Human) |

|             |        |             |                      |
|-------------|--------|-------------|----------------------|
| Olitoriside | P63316 | TNNC1_HUMAN | Homo sapiens (Human) |
| Olitoriside | Q06520 | ST2A1_HUMAN | Homo sapiens (Human) |
| Olitoriside | P12931 | SRC_HUMAN   | Homo sapiens (Human) |
| Olitoriside | P07900 | HS90A_HUMAN | Homo sapiens (Human) |
| Olitoriside | P04278 | SHBG_HUMAN  | Homo sapiens (Human) |
| Olitoriside | P04818 | TYSY_HUMAN  | Homo sapiens (Human) |
| Olitoriside | P03372 | ESR1_HUMAN  | Homo sapiens (Human) |
| Olitoriside | P02774 | VTDB_HUMAN  | Homo sapiens (Human) |
| Olitoriside | P48449 | ERG7_HUMAN  | Homo sapiens (Human) |
| Olitoriside | P00736 | C1R_HUMAN   | Homo sapiens (Human) |
| Olitoriside | P29474 | NOS3_HUMAN  | Homo sapiens (Human) |
| Olitoriside | P14174 | MIF_HUMAN   | Homo sapiens (Human) |
| Olitoriside | P27487 | DPP4_HUMAN  | Homo sapiens (Human) |
| Olitoriside | Q02127 | PYRD_HUMAN  | Homo sapiens (Human) |
| Olitoriside | Q00796 | DHSO_HUMAN  | Homo sapiens (Human) |
| Olitoriside | P08235 | MCR_HUMAN   | Homo sapiens (Human) |
| Olitoriside | P08758 | ANXA5_HUMAN | Homo sapiens (Human) |
| Olitoriside | P08631 | HCK_HUMAN   | Homo sapiens (Human) |
| Olitoriside | P01709 | LV208_HUMAN | Homo sapiens (Human) |
| Olitoriside | Q08499 | PDE4D_HUMAN | Homo sapiens (Human) |
| Olitoriside | P00374 | DYR_HUMAN   | Homo sapiens (Human) |
| Olitoriside | P02743 | SAMP_HUMAN  | Homo sapiens (Human) |
| Olitoriside | P22894 | MMP8_HUMAN  | Homo sapiens (Human) |
| Olitoriside | P29218 | IMPA1_HUMAN | Homo sapiens (Human) |
| Olitoriside | P35398 | RORA_HUMAN  | Homo sapiens (Human) |
| Olitoriside | P36897 | TGFR1_HUMAN | Homo sapiens (Human) |
| Olitoriside | P17707 | DCAM_HUMAN  | Homo sapiens (Human) |
| Olitoriside | P45452 | MMP13_HUMAN | Homo sapiens (Human) |
| Olitoriside | P06737 | PYGL_HUMAN  | Homo sapiens (Human) |
| Olitoriside | P00390 | GSHR_HUMAN  | Homo sapiens (Human) |
| Olitoriside | P25311 | ZA2G_HUMAN  | Homo sapiens (Human) |
| Olitoriside | P19971 | TYPH_HUMAN  | Homo sapiens (Human) |
| Olitoriside | P43235 | CATK_HUMAN  | Homo sapiens (Human) |
| Olitoriside | P00742 | FA10_HUMAN  | Homo sapiens (Human) |
| Olitoriside | P43155 | CACP_HUMAN  | Homo sapiens (Human) |
| Olitoriside | O15496 | PA2GX_HUMAN | Homo sapiens (Human) |
| Olitoriside | P53355 | DAPK1_HUMAN | Homo sapiens (Human) |
| Olitoriside | P23526 | SAHH_HUMAN  | Homo sapiens (Human) |
| Olitoriside | P00734 | THRB_HUMAN  | Homo sapiens (Human) |
| Olitoriside | P53041 | PPP5_HUMAN  | Homo sapiens (Human) |
| Olitoriside | O15530 | PDPK1_HUMAN | Homo sapiens (Human) |
| Olitoriside | Q99933 | BAG1_HUMAN  | Homo sapiens (Human) |
| Olitoriside | P05019 | IGF1_HUMAN  | Homo sapiens (Human) |
| Olitoriside | P28845 | DHI1_HUMAN  | Homo sapiens (Human) |
| Olitoriside | P00439 | PH4H_HUMAN  | Homo sapiens (Human) |
| Olitoriside | Q07912 | ACK1_HUMAN  | Homo sapiens (Human) |
| Olitoriside | P00325 | ADH1B_HUMAN | Homo sapiens (Human) |
| Olitoriside | P08069 | IGF1R_HUMAN | Homo sapiens (Human) |
| Olitoriside | P31749 | AKT1_HUMAN  | Homo sapiens (Human) |
| Olitoriside | P15559 | NQO1_HUMAN  | Homo sapiens (Human) |
| Olitoriside | P00797 | RENI_HUMAN  | Homo sapiens (Human) |
| Olitoriside | Q9P2W7 | B3GA1_HUMAN | Homo sapiens (Human) |
| Olitoriside | P49841 | GSK3B_HUMAN | Homo sapiens (Human) |
| Olitoriside | Q9NVS9 | PNPO_HUMAN  | Homo sapiens (Human) |
| Olitoriside | Q96T66 | NMNA3_HUMAN | Homo sapiens (Human) |
| Olitoriside | P19793 | RXRA_HUMAN  | Homo sapiens (Human) |
| Olitoriside | P39900 | MMP12_HUMAN | Homo sapiens (Human) |
| Olitoriside | O76074 | PDE5A_HUMAN | Homo sapiens (Human) |

|                               |        |             |                      |
|-------------------------------|--------|-------------|----------------------|
| Olitoriside                   | P62508 | ERR3_HUMAN  | Homo sapiens (Human) |
| Olitoriside                   | P00326 | ADH1G_HUMAN | Homo sapiens (Human) |
| Olitoriside                   | O15382 | BCAT2_HUMAN | Homo sapiens (Human) |
| Olitoriside                   | P05091 | ALDH2_HUMAN | Homo sapiens (Human) |
| Olitoriside                   | P15056 | BRAF_HUMAN  | Homo sapiens (Human) |
| Olitoriside                   | P07686 | HEXB_HUMAN  | Homo sapiens (Human) |
| Olitoriside                   | Q9BY41 | HDAC8_HUMAN | Homo sapiens (Human) |
| Olitoriside                   | Q16828 | DUS6_HUMAN  | Homo sapiens (Human) |
| Olitoriside                   | P11086 | PNMT_HUMAN  | Homo sapiens (Human) |
| Olitoriside                   | P49354 | FNTA_HUMAN  | Homo sapiens (Human) |
| Olitoriside                   | P15153 | RAC2_HUMAN  | Homo sapiens (Human) |
| Olitoriside                   | P49789 | FHIT_HUMAN  | Homo sapiens (Human) |
| Olitoriside                   | Q10588 | BST1_HUMAN  | Homo sapiens (Human) |
| Olitoriside                   | Q13133 | NR1H3_HUMAN | Homo sapiens (Human) |
| Olitoriside                   | P51570 | GALK1_HUMAN | Homo sapiens (Human) |
| Olitoriside                   | P11362 | FGFR1_HUMAN | Homo sapiens (Human) |
| Olitoriside                   | Q00534 | CDK6_HUMAN  | Homo sapiens (Human) |
| Olitoriside                   | P08246 | ELNE_HUMAN  | Homo sapiens (Human) |
| Olitoriside                   | P49638 | TTPA_HUMAN  | Homo sapiens (Human) |
| syringaresinol diglucoside_qt | P11309 | PIM1_HUMAN  | Homo sapiens (Human) |
| syringaresinol diglucoside_qt | P10275 | ANDR_HUMAN  | Homo sapiens (Human) |
| syringaresinol diglucoside_qt | P00918 | CAH2_HUMAN  | Homo sapiens (Human) |
| syringaresinol diglucoside_qt | P42574 | CASP3_HUMAN | Homo sapiens (Human) |
| syringaresinol diglucoside_qt | P56817 | BACE1_HUMAN | Homo sapiens (Human) |
| syringaresinol diglucoside_qt | Q16740 | CLPP_HUMAN  | Homo sapiens (Human) |
| syringaresinol diglucoside_qt | P00491 | PNPH_HUMAN  | Homo sapiens (Human) |
| syringaresinol diglucoside_qt | P02766 | TTHY_HUMAN  | Homo sapiens (Human) |
| syringaresinol diglucoside_qt | P09211 | GSTP1_HUMAN | Homo sapiens (Human) |
| syringaresinol diglucoside_qt | P78536 | ADA17_HUMAN | Homo sapiens (Human) |
| syringaresinol diglucoside_qt | P06276 | CHLE_HUMAN  | Homo sapiens (Human) |
| syringaresinol diglucoside_qt | P00746 | CFAD_HUMAN  | Homo sapiens (Human) |
| syringaresinol diglucoside_qt | P53779 | MK10_HUMAN  | Homo sapiens (Human) |
| syringaresinol diglucoside_qt | P35968 | VGFR2_HUMAN | Homo sapiens (Human) |
| syringaresinol diglucoside_qt | P04278 | SHBG_HUMAN  | Homo sapiens (Human) |
| syringaresinol diglucoside_qt | O60911 | CATL2_HUMAN | Homo sapiens (Human) |
| syringaresinol diglucoside_qt | Q8NBQ5 | DHB11_HUMAN | Homo sapiens (Human) |
| syringaresinol diglucoside_qt | P25774 | CATS_HUMAN  | Homo sapiens (Human) |
| syringaresinol diglucoside_qt | P06401 | PRGR_HUMAN  | Homo sapiens (Human) |
| syringaresinol diglucoside_qt | P62937 | PPIA_HUMAN  | Homo sapiens (Human) |
| syringaresinol diglucoside_qt | P07900 | HS90A_HUMAN | Homo sapiens (Human) |
| syringaresinol diglucoside_qt | P04062 | GLCM_HUMAN  | Homo sapiens (Human) |
| syringaresinol diglucoside_qt | P42330 | AK1C3_HUMAN | Homo sapiens (Human) |
| syringaresinol diglucoside_qt | P14174 | MIF_HUMAN   | Homo sapiens (Human) |
| syringaresinol diglucoside_qt | O14757 | CHK1_HUMAN  | Homo sapiens (Human) |
| syringaresinol diglucoside_qt | P62508 | ERR3_HUMAN  | Homo sapiens (Human) |
| syringaresinol diglucoside_qt | P14061 | DHB1_HUMAN  | Homo sapiens (Human) |
| syringaresinol diglucoside_qt | P08069 | IGF1R_HUMAN | Homo sapiens (Human) |
| syringaresinol diglucoside_qt | Q06520 | ST2A1_HUMAN | Homo sapiens (Human) |
| syringaresinol diglucoside_qt | P45452 | MMP13_HUMAN | Homo sapiens (Human) |
| syringaresinol diglucoside_qt | P11362 | FGFR1_HUMAN | Homo sapiens (Human) |
| syringaresinol diglucoside_qt | Q08499 | PDE4D_HUMAN | Homo sapiens (Human) |
| syringaresinol diglucoside_qt | P07339 | CATD_HUMAN  | Homo sapiens (Human) |
| syringaresinol diglucoside_qt | O15496 | PA2GX_HUMAN | Homo sapiens (Human) |
| syringaresinol diglucoside_qt | Q02127 | PYRD_HUMAN  | Homo sapiens (Human) |
| syringaresinol diglucoside_qt | P35398 | RORA_HUMAN  | Homo sapiens (Human) |
| syringaresinol diglucoside_qt | P45983 | MK08_HUMAN  | Homo sapiens (Human) |
| syringaresinol diglucoside_qt | P50579 | MAP2_HUMAN  | Homo sapiens (Human) |
| syringaresinol diglucoside_qt | P19793 | RXRA_HUMAN  | Homo sapiens (Human) |

|                               |        |             |                      |
|-------------------------------|--------|-------------|----------------------|
| syringaresinol diglucoside_qt | Q16539 | MK14_HUMAN  | Homo sapiens (Human) |
| syringaresinol diglucoside_qt | P35221 | CTNA1_HUMAN | Homo sapiens (Human) |
| syringaresinol diglucoside_qt | Q9NP99 | TREM1_HUMAN | Homo sapiens (Human) |
| syringaresinol diglucoside_qt | P08631 | HCK_HUMAN   | Homo sapiens (Human) |
| syringaresinol diglucoside_qt | P02774 | VTDB_HUMAN  | Homo sapiens (Human) |
| syringaresinol diglucoside_qt | P54760 | EPHB4_HUMAN | Homo sapiens (Human) |
| syringaresinol diglucoside_qt | P20248 | CCNA2_HUMAN | Homo sapiens (Human) |
| syringaresinol diglucoside_qt | P63316 | TNNC1_HUMAN | Homo sapiens (Human) |
| syringaresinol diglucoside_qt | Q07343 | PDE4B_HUMAN | Homo sapiens (Human) |
| syringaresinol diglucoside_qt | P48736 | PK3CG_HUMAN | Homo sapiens (Human) |
| syringaresinol diglucoside_qt | P27338 | AOFB_HUMAN  | Homo sapiens (Human) |
| syringaresinol diglucoside_qt | O14965 | AURKA_HUMAN | Homo sapiens (Human) |
| syringaresinol diglucoside_qt | P00533 | EGFR_HUMAN  | Homo sapiens (Human) |
| syringaresinol diglucoside_qt | P00374 | DYR_HUMAN   | Homo sapiens (Human) |
| syringaresinol diglucoside_qt | P23141 | EST1_HUMAN  | Homo sapiens (Human) |
| syringaresinol diglucoside_qt | P15056 | BRAF_HUMAN  | Homo sapiens (Human) |
| syringaresinol diglucoside_qt | P00390 | GSHR_HUMAN  | Homo sapiens (Human) |
| syringaresinol diglucoside_qt | Q12884 | SEPR_HUMAN  | Homo sapiens (Human) |
| syringaresinol diglucoside_qt | P16109 | LYAM3_HUMAN | Homo sapiens (Human) |
| syringaresinol diglucoside_qt | P11511 | CP19A_HUMAN | Homo sapiens (Human) |
| syringaresinol diglucoside_qt | P04745 | AMY1_HUMAN  | Homo sapiens (Human) |
| syringaresinol diglucoside_qt | Q13126 | MTAP_HUMAN  | Homo sapiens (Human) |
| syringaresinol diglucoside_qt | P28482 | MK01_HUMAN  | Homo sapiens (Human) |
| syringaresinol diglucoside_qt | P03950 | ANGI_HUMAN  | Homo sapiens (Human) |
| syringaresinol diglucoside_qt | P53041 | PPP5_HUMAN  | Homo sapiens (Human) |
| syringaresinol diglucoside_qt | P03372 | ESR1_HUMAN  | Homo sapiens (Human) |
| syringaresinol diglucoside_qt | P49763 | PLGF_HUMAN  | Homo sapiens (Human) |
| syringaresinol diglucoside_qt | Q00796 | DHSO_HUMAN  | Homo sapiens (Human) |
| syringaresinol diglucoside_qt | P0DP23 | CALM1_HUMAN | Homo sapiens (Human) |
| syringaresinol diglucoside_qt | P0DP24 | CALM2_HUMAN | Homo sapiens (Human) |
| syringaresinol diglucoside_qt | P0DP25 | CALM3_HUMAN | Homo sapiens (Human) |
| syringaresinol diglucoside_qt | P54577 | SYYC_HUMAN  | Homo sapiens (Human) |
| syringaresinol diglucoside_qt | Q00987 | MDM2_HUMAN  | Homo sapiens (Human) |
| syringaresinol diglucoside_qt | P39900 | MMP12_HUMAN | Homo sapiens (Human) |
| syringaresinol diglucoside_qt | P04818 | TYSY_HUMAN  | Homo sapiens (Human) |
| syringaresinol diglucoside_qt | P02768 | ALBU_HUMAN  | Homo sapiens (Human) |
| syringaresinol diglucoside_qt | P22894 | MMP8_HUMAN  | Homo sapiens (Human) |
| syringaresinol diglucoside_qt | P55055 | NR1H2_HUMAN | Homo sapiens (Human) |
| syringaresinol diglucoside_qt | P53582 | MAP11_HUMAN | Homo sapiens (Human) |
| syringaresinol diglucoside_qt | P00742 | FA10_HUMAN  | Homo sapiens (Human) |
| syringaresinol diglucoside_qt | P24941 | CDK2_HUMAN  | Homo sapiens (Human) |
| syringaresinol diglucoside_qt | P11712 | CP2C9_HUMAN | Homo sapiens (Human) |
| syringaresinol diglucoside_qt | P08709 | FA7_HUMAN   | Homo sapiens (Human) |
| syringaresinol diglucoside_qt | Q13370 | PDE3B_HUMAN | Homo sapiens (Human) |
| syringaresinol diglucoside_qt | P21802 | FGFR2_HUMAN | Homo sapiens (Human) |
| syringaresinol diglucoside_qt | P00734 | THRB_HUMAN  | Homo sapiens (Human) |
| syringaresinol diglucoside_qt | P52732 | KIF11_HUMAN | Homo sapiens (Human) |
| syringaresinol diglucoside_qt | Q13133 | NR1H3_HUMAN | Homo sapiens (Human) |
| syringaresinol diglucoside_qt | P29474 | NOS3_HUMAN  | Homo sapiens (Human) |
| syringaresinol diglucoside_qt | P00439 | PH4H_HUMAN  | Homo sapiens (Human) |
| syringaresinol diglucoside_qt | P16152 | CBR1_HUMAN  | Homo sapiens (Human) |
| syringaresinol diglucoside_qt | O60760 | HPGDS_HUMAN | Homo sapiens (Human) |
| syringaresinol diglucoside_qt | P27487 | DPP4_HUMAN  | Homo sapiens (Human) |
| syringaresinol diglucoside_qt | P11142 | HSP7C_HUMAN | Homo sapiens (Human) |
| syringaresinol diglucoside_qt | P49841 | GSK3B_HUMAN | Homo sapiens (Human) |
| syringaresinol diglucoside_qt | O15530 | PDPK1_HUMAN | Homo sapiens (Human) |
| syringaresinol diglucoside_qt | O76074 | PDE5A_HUMAN | Homo sapiens (Human) |
| syringaresinol diglucoside_qt | P49354 | FNTA_HUMAN  | Homo sapiens (Human) |

|                               |        |             |                      |
|-------------------------------|--------|-------------|----------------------|
| syringaresinol diglucoside_qt | P00797 | RENI_HUMAN  | Homo sapiens (Human) |
| syringaresinol diglucoside_qt | Q08881 | ITK_HUMAN   | Homo sapiens (Human) |
| syringaresinol diglucoside_qt | P19971 | TYPH_HUMAN  | Homo sapiens (Human) |
| syringaresinol diglucoside_qt | P43235 | CATK_HUMAN  | Homo sapiens (Human) |
| syringaresinol diglucoside_qt | P08235 | MCR_HUMAN   | Homo sapiens (Human) |
| syringaresinol diglucoside_qt | Q00534 | CDK6_HUMAN  | Homo sapiens (Human) |
| syringaresinol diglucoside_qt | P04179 | SODM_HUMAN  | Homo sapiens (Human) |
| syringaresinol diglucoside_qt | P17707 | DCAM_HUMAN  | Homo sapiens (Human) |
| syringaresinol diglucoside_qt | P06737 | PYGL_HUMAN  | Homo sapiens (Human) |
| syringaresinol diglucoside_qt | Q01469 | FABP5_HUMAN | Homo sapiens (Human) |
| syringaresinol diglucoside_qt | P25311 | ZA2G_HUMAN  | Homo sapiens (Human) |
| syringaresinol diglucoside_qt | P00325 | ADH1B_HUMAN | Homo sapiens (Human) |
| syringaresinol diglucoside_qt | P43405 | KSYK_HUMAN  | Homo sapiens (Human) |
| syringaresinol diglucoside_qt | P28845 | DHI1_HUMAN  | Homo sapiens (Human) |
| syringaresinol diglucoside_qt | P07858 | CATB_HUMAN  | Homo sapiens (Human) |
| syringaresinol diglucoside_qt | P47929 | LEG7_HUMAN  | Homo sapiens (Human) |
| syringaresinol diglucoside_qt | P16083 | NQO2_HUMAN  | Homo sapiens (Human) |
| syringaresinol diglucoside_qt | P12931 | SRC_HUMAN   | Homo sapiens (Human) |
| syringaresinol diglucoside_qt | P09874 | PARP1_HUMAN | Homo sapiens (Human) |
| syringaresinol diglucoside_qt | P42768 | WASP_HUMAN  | Homo sapiens (Human) |
| syringaresinol diglucoside_qt | P00751 | CFAB_HUMAN  | Homo sapiens (Human) |
| syringaresinol diglucoside_qt | P15121 | ALDR_HUMAN  | Homo sapiens (Human) |
| syringaresinol diglucoside_qt | P43155 | CACP_HUMAN  | Homo sapiens (Human) |
| syringaresinol diglucoside_qt | Q04828 | AK1C1_HUMAN | Homo sapiens (Human) |
| syringaresinol diglucoside_qt | P08254 | MMP3_HUMAN  | Homo sapiens (Human) |
| syringaresinol diglucoside_qt | P15559 | NQO1_HUMAN  | Homo sapiens (Human) |
| syringaresinol diglucoside_qt | Q13231 | CHIT1_HUMAN | Homo sapiens (Human) |
| syringaresinol diglucoside_qt | P78368 | KC1G2_HUMAN | Homo sapiens (Human) |
| syringaresinol diglucoside_qt | P11766 | ADHX_HUMAN  | Homo sapiens (Human) |
| syringaresinol diglucoside_qt | Q9BY41 | HDAC8_HUMAN | Homo sapiens (Human) |
| syringaresinol diglucoside_qt | P18075 | BMP7_HUMAN  | Homo sapiens (Human) |
| syringaresinol diglucoside_qt | P11586 | C1TC_HUMAN  | Homo sapiens (Human) |
| syringaresinol diglucoside_qt | P68400 | CSK21_HUMAN | Homo sapiens (Human) |
| syringaresinol diglucoside_qt | O15382 | BCAT2_HUMAN | Homo sapiens (Human) |
| syringaresinol diglucoside_qt | P10827 | THA_HUMAN   | Homo sapiens (Human) |
| syringaresinol diglucoside_qt | P20701 | ITAL_HUMAN  | Homo sapiens (Human) |
| syringaresinol diglucoside_qt | P08246 | ELNE_HUMAN  | Homo sapiens (Human) |
| syringaresinol diglucoside_qt | P06239 | LCK_HUMAN   | Homo sapiens (Human) |
| syringaresinol diglucoside_qt | P18031 | PTN1_HUMAN  | Homo sapiens (Human) |
| syringaresinol diglucoside_qt | P48449 | ERG7_HUMAN  | Homo sapiens (Human) |
| syringaresinol diglucoside_qt | P55263 | ADK_HUMAN   | Homo sapiens (Human) |
| syringaresinol diglucoside_qt | P10828 | THB_HUMAN   | Homo sapiens (Human) |
| syringaresinol diglucoside_qt | P08581 | MET_HUMAN   | Homo sapiens (Human) |
| syringaresinol diglucoside_qt | P02753 | RET4_HUMAN  | Homo sapiens (Human) |
| syringaresinol diglucoside_qt | P06126 | CD1A_HUMAN  | Homo sapiens (Human) |
| syringaresinol diglucoside_qt | P53350 | PLK1_HUMAN  | Homo sapiens (Human) |
| syringaresinol diglucoside_qt | P15090 | FABP4_HUMAN | Homo sapiens (Human) |
| syringaresinol diglucoside_qt | P08263 | GSTA1_HUMAN | Homo sapiens (Human) |
| syringaresinol diglucoside_qt | P30043 | BLVRB_HUMAN | Homo sapiens (Human) |
| syringaresinol diglucoside_qt | P37231 | PPARG_HUMAN | Homo sapiens (Human) |
| syringaresinol diglucoside_qt | P41240 | CSK_HUMAN   | Homo sapiens (Human) |
| syringaresinol diglucoside_qt | Q9NVS9 | PNPO_HUMAN  | Homo sapiens (Human) |
| syringaresinol diglucoside_qt | P52333 | JAK3_HUMAN  | Homo sapiens (Human) |
| syringaresinol diglucoside_qt | Q07869 | PPARA_HUMAN | Homo sapiens (Human) |
| syringaresinol diglucoside_qt | P52895 | AK1C2_HUMAN | Homo sapiens (Human) |
| syringaresinol diglucoside_qt | P05019 | IGF1_HUMAN  | Homo sapiens (Human) |
| syringaresinol diglucoside_qt | Q9P286 | PAK5_HUMAN  | Homo sapiens (Human) |
| syringaresinol diglucoside_qt | P53355 | DAPK1_HUMAN | Homo sapiens (Human) |



|                               |        |             |                      |
|-------------------------------|--------|-------------|----------------------|
| syringaresinol diglucoside_qt | P02743 | SAMP_HUMAN  | Homo sapiens (Human) |
| syringaresinol diglucoside_qt | P34896 | GLYC_HUMAN  | Homo sapiens (Human) |
| syringaresinol diglucoside_qt | P27707 | DCK_HUMAN   | Homo sapiens (Human) |
| syringaresinol diglucoside_qt | Q96T66 | NMNA3_HUMAN | Homo sapiens (Human) |
| syringaresinol diglucoside_qt | O75469 | NR1I2_HUMAN | Homo sapiens (Human) |
| syringaresinol diglucoside_qt | P01709 | LV208_HUMAN | Homo sapiens (Human) |
| Olitoriside_qt                | P52895 | AK1C2_HUMAN | Homo sapiens (Human) |
| Olitoriside_qt                | P00918 | CAH2_HUMAN  | Homo sapiens (Human) |
| Olitoriside_qt                | P49137 | MAPK2_HUMAN | Homo sapiens (Human) |
| Olitoriside_qt                | Q16539 | MK14_HUMAN  | Homo sapiens (Human) |
| Olitoriside_qt                | P00491 | PNPH_HUMAN  | Homo sapiens (Human) |
| Olitoriside_qt                | P12643 | BMP2_HUMAN  | Homo sapiens (Human) |
| Olitoriside_qt                | P11309 | PIM1_HUMAN  | Homo sapiens (Human) |
| Olitoriside_qt                | Q8NBQ5 | DHB11_HUMAN | Homo sapiens (Human) |
| Olitoriside_qt                | Q9NP99 | TREM1_HUMAN | Homo sapiens (Human) |
| Olitoriside_qt                | P10275 | ANDR_HUMAN  | Homo sapiens (Human) |
| Olitoriside_qt                | P04062 | GLCM_HUMAN  | Homo sapiens (Human) |
| Olitoriside_qt                | P56817 | BACE1_HUMAN | Homo sapiens (Human) |
| Olitoriside_qt                | P07339 | CATD_HUMAN  | Homo sapiens (Human) |
| Olitoriside_qt                | P11511 | CP19A_HUMAN | Homo sapiens (Human) |
| Olitoriside_qt                | P55055 | NR1H2_HUMAN | Homo sapiens (Human) |
| Olitoriside_qt                | Q16740 | CLPP_HUMAN  | Homo sapiens (Human) |
| Olitoriside_qt                | Q06520 | ST2A1_HUMAN | Homo sapiens (Human) |
| Olitoriside_qt                | P04179 | SODM_HUMAN  | Homo sapiens (Human) |
| Olitoriside_qt                | Q00796 | DHSO_HUMAN  | Homo sapiens (Human) |
| Olitoriside_qt                | P55210 | CASP7_HUMAN | Homo sapiens (Human) |
| Olitoriside_qt                | Q07343 | PDE4B_HUMAN | Homo sapiens (Human) |
| Olitoriside_qt                | P00533 | EGFR_HUMAN  | Homo sapiens (Human) |
| Olitoriside_qt                | O14757 | CHK1_HUMAN  | Homo sapiens (Human) |
| Olitoriside_qt                | P00746 | CFAD_HUMAN  | Homo sapiens (Human) |
| Olitoriside_qt                | P12931 | SRC_HUMAN   | Homo sapiens (Human) |
| Olitoriside_qt                | P03372 | ESR1_HUMAN  | Homo sapiens (Human) |
| Olitoriside_qt                | P14061 | DHB1_HUMAN  | Homo sapiens (Human) |
| Olitoriside_qt                | P62937 | PPIA_HUMAN  | Homo sapiens (Human) |
| Olitoriside_qt                | P04278 | SHBG_HUMAN  | Homo sapiens (Human) |
| Olitoriside_qt                | P15121 | ALDR_HUMAN  | Homo sapiens (Human) |
| Olitoriside_qt                | O15496 | PA2GX_HUMAN | Homo sapiens (Human) |
| Olitoriside_qt                | P04818 | TYSY_HUMAN  | Homo sapiens (Human) |
| Olitoriside_qt                | P08758 | ANXA5_HUMAN | Homo sapiens (Human) |
| Olitoriside_qt                | P02766 | TTHY_HUMAN  | Homo sapiens (Human) |
| Olitoriside_qt                | P02774 | VTDB_HUMAN  | Homo sapiens (Human) |
| Olitoriside_qt                | P00751 | CFAB_HUMAN  | Homo sapiens (Human) |
| Olitoriside_qt                | P06401 | PRGR_HUMAN  | Homo sapiens (Human) |
| Olitoriside_qt                | P08235 | MCR_HUMAN   | Homo sapiens (Human) |
| Olitoriside_qt                | P36897 | TGFR1_HUMAN | Homo sapiens (Human) |
| Olitoriside_qt                | P29474 | NOS3_HUMAN  | Homo sapiens (Human) |
| Olitoriside_qt                | P00374 | DYR_HUMAN   | Homo sapiens (Human) |
| Olitoriside_qt                | P37231 | PPARG_HUMAN | Homo sapiens (Human) |
| Olitoriside_qt                | Q13126 | MTAP_HUMAN  | Homo sapiens (Human) |
| Olitoriside_qt                | O15530 | PDPK1_HUMAN | Homo sapiens (Human) |
| Olitoriside_qt                | P53041 | PPP5_HUMAN  | Homo sapiens (Human) |
| Olitoriside_qt                | Q16828 | DUS6_HUMAN  | Homo sapiens (Human) |
| Olitoriside_qt                | P19793 | RXRA_HUMAN  | Homo sapiens (Human) |
| Olitoriside_qt                | Q02127 | PYRD_HUMAN  | Homo sapiens (Human) |
| Lucidumoside D_qt             | P53779 | MK10_HUMAN  | Homo sapiens (Human) |
| Lucidumoside D_qt             | P11309 | PIM1_HUMAN  | Homo sapiens (Human) |
| Lucidumoside D_qt             | P02766 | TTHY_HUMAN  | Homo sapiens (Human) |
| Lucidumoside D_qt             | P62937 | PPIA_HUMAN  | Homo sapiens (Human) |

|                   |        |             |                      |
|-------------------|--------|-------------|----------------------|
| Lucidumoside D_qt | P26196 | DDX6_HUMAN  | Homo sapiens (Human) |
| Lucidumoside D_qt | P20248 | CCNA2_HUMAN | Homo sapiens (Human) |
| Lucidumoside D_qt | O14757 | CHK1_HUMAN  | Homo sapiens (Human) |
| Lucidumoside D_qt | P23946 | CMA1_HUMAN  | Homo sapiens (Human) |
| Lucidumoside D_qt | P54760 | EPHB4_HUMAN | Homo sapiens (Human) |
| Lucidumoside D_qt | P45983 | MK08_HUMAN  | Homo sapiens (Human) |
| Lucidumoside D_qt | P55055 | NR1H2_HUMAN | Homo sapiens (Human) |
| Lucidumoside D_qt | P00918 | CAH2_HUMAN  | Homo sapiens (Human) |
| Lucidumoside D_qt | P08254 | MMP3_HUMAN  | Homo sapiens (Human) |
| Lucidumoside D_qt | P09211 | GSTP1_HUMAN | Homo sapiens (Human) |
| Lucidumoside D_qt | Q92731 | ESR2_HUMAN  | Homo sapiens (Human) |
| Lucidumoside D_qt | P07339 | CATD_HUMAN  | Homo sapiens (Human) |
| Lucidumoside D_qt | P06276 | CHLE_HUMAN  | Homo sapiens (Human) |
| Lucidumoside D_qt | P62942 | FKB1A_HUMAN | Homo sapiens (Human) |
| Lucidumoside D_qt | P10275 | ANDR_HUMAN  | Homo sapiens (Human) |
| Lucidumoside D_qt | P04062 | GLCM_HUMAN  | Homo sapiens (Human) |
| Lucidumoside D_qt | P00491 | PNPH_HUMAN  | Homo sapiens (Human) |
| Lucidumoside D_qt | P00751 | CFAB_HUMAN  | Homo sapiens (Human) |
| Lucidumoside D_qt | P28482 | MK01_HUMAN  | Homo sapiens (Human) |
| Lucidumoside D_qt | Q9NP99 | TREM1_HUMAN | Homo sapiens (Human) |
| Lucidumoside D_qt | P03372 | ESR1_HUMAN  | Homo sapiens (Human) |
| Lucidumoside D_qt | P53582 | MAP11_HUMAN | Homo sapiens (Human) |
| Lucidumoside D_qt | P15121 | ALDR_HUMAN  | Homo sapiens (Human) |
| Lucidumoside D_qt | P52732 | KIF11_HUMAN | Homo sapiens (Human) |
| Lucidumoside D_qt | P11511 | CP19A_HUMAN | Homo sapiens (Human) |
| Lucidumoside D_qt | P24941 | CDK2_HUMAN  | Homo sapiens (Human) |
| Lucidumoside D_qt | P37231 | PPARG_HUMAN | Homo sapiens (Human) |
| Lucidumoside D_qt | P08842 | STS_HUMAN   | Homo sapiens (Human) |
| Lucidumoside D_qt | P27338 | AOFB_HUMAN  | Homo sapiens (Human) |
| Lucidumoside D_qt | P00533 | EGFR_HUMAN  | Homo sapiens (Human) |
| Lucidumoside D_qt | P02768 | ALBU_HUMAN  | Homo sapiens (Human) |
| Lucidumoside D_qt | P11142 | HSP7C_HUMAN | Homo sapiens (Human) |
| Lucidumoside D_qt | P06401 | PRGR_HUMAN  | Homo sapiens (Human) |
| Lucidumoside D_qt | P07858 | CATB_HUMAN  | Homo sapiens (Human) |
| Lucidumoside D_qt | P08758 | ANXA5_HUMAN | Homo sapiens (Human) |
| Lucidumoside D_qt | P03950 | ANGI_HUMAN  | Homo sapiens (Human) |
| Lucidumoside D_qt | P00734 | THRB_HUMAN  | Homo sapiens (Human) |
| Lucidumoside D_qt | P32320 | CDD_HUMAN   | Homo sapiens (Human) |
| Lucidumoside D_qt | O60911 | CATL2_HUMAN | Homo sapiens (Human) |
| Lucidumoside D_qt | P49841 | GSK3B_HUMAN | Homo sapiens (Human) |
| Lucidumoside D_qt | P00746 | CFAD_HUMAN  | Homo sapiens (Human) |
| Lucidumoside D_qt | Q08499 | PDE4D_HUMAN | Homo sapiens (Human) |
| Lucidumoside D_qt | P02774 | VTDB_HUMAN  | Homo sapiens (Human) |
| Lucidumoside D_qt | P45452 | MMP13_HUMAN | Homo sapiens (Human) |
| Lucidumoside D_qt | P02743 | SAMP_HUMAN  | Homo sapiens (Human) |
| Lucidumoside D_qt | P12931 | SRC_HUMAN   | Homo sapiens (Human) |
| Lucidumoside D_qt | P23141 | EST1_HUMAN  | Homo sapiens (Human) |
| Lucidumoside D_qt | P16152 | CBR1_HUMAN  | Homo sapiens (Human) |
| Lucidumoside D_qt | O76074 | PDE5A_HUMAN | Homo sapiens (Human) |
| Lucidumoside D_qt | Q03181 | PPARD_HUMAN | Homo sapiens (Human) |
| Lucidumoside D_qt | P36897 | TGFR1_HUMAN | Homo sapiens (Human) |
| Lucidumoside D_qt | O14965 | AURKA_HUMAN | Homo sapiens (Human) |
| Lucidumoside D_qt | P14174 | MIF_HUMAN   | Homo sapiens (Human) |
| Lucidumoside D_qt | P29474 | NOS3_HUMAN  | Homo sapiens (Human) |
| Lucidumoside D_qt | P07900 | HS90A_HUMAN | Homo sapiens (Human) |
| Lucidumoside D_qt | Q07343 | PDE4B_HUMAN | Homo sapiens (Human) |
| Lucidumoside D_qt | P35398 | RORA_HUMAN  | Homo sapiens (Human) |
| Lucidumoside D_qt | P01709 | LV208_HUMAN | Homo sapiens (Human) |

|                   |        |             |                      |
|-------------------|--------|-------------|----------------------|
| Lucidumoside D_qt | Q13231 | CHIT1_HUMAN | Homo sapiens (Human) |
| Lucidumoside D_qt | P04278 | SHBG_HUMAN  | Homo sapiens (Human) |
| Lucidumoside D_qt | P42330 | AK1C3_HUMAN | Homo sapiens (Human) |
| Lucidumoside D_qt | P47929 | LEG7_HUMAN  | Homo sapiens (Human) |
| Lucidumoside D_qt | P56817 | BACE1_HUMAN | Homo sapiens (Human) |
| Lucidumoside D_qt | P08235 | MCR_HUMAN   | Homo sapiens (Human) |
| Lucidumoside D_qt | Q13370 | PDE3B_HUMAN | Homo sapiens (Human) |
| Lucidumoside D_qt | P50579 | MAP2_HUMAN  | Homo sapiens (Human) |
| Lucidumoside D_qt | Q16539 | MK14_HUMAN  | Homo sapiens (Human) |
| Lucidumoside D_qt | O15382 | BCAT2_HUMAN | Homo sapiens (Human) |
| Lucidumoside D_qt | P35968 | VGFR2_HUMAN | Homo sapiens (Human) |
| Lucidumoside D_qt | P00390 | GSHR_HUMAN  | Homo sapiens (Human) |
| Lucidumoside D_qt | P84077 | ARF1_HUMAN  | Homo sapiens (Human) |
| Lucidumoside D_qt | P17707 | DCAM_HUMAN  | Homo sapiens (Human) |
| Lucidumoside D_qt | P53350 | PLK1_HUMAN  | Homo sapiens (Human) |
| Lucidumoside D_qt | P04818 | TYSY_HUMAN  | Homo sapiens (Human) |
| Lucidumoside D_qt | O15530 | PDPK1_HUMAN | Homo sapiens (Human) |
| Lucidumoside D_qt | Q02127 | PYRD_HUMAN  | Homo sapiens (Human) |
| Lucidumoside D_qt | P49354 | FNTA_HUMAN  | Homo sapiens (Human) |
| Lucidumoside D_qt | P11586 | C1TC_HUMAN  | Homo sapiens (Human) |
| Lucidumoside D_qt | P06737 | PYGL_HUMAN  | Homo sapiens (Human) |
| Lucidumoside D_qt | P00374 | DYR_HUMAN   | Homo sapiens (Human) |
| Lucidumoside D_qt | P09960 | LKHA4_HUMAN | Homo sapiens (Human) |
| Lucidumoside D_qt | P19793 | RXRA_HUMAN  | Homo sapiens (Human) |
| Lucidumoside D_qt | P15090 | FABP4_HUMAN | Homo sapiens (Human) |
| Lucidumoside D_qt | P14061 | DHB1_HUMAN  | Homo sapiens (Human) |
| Lucidumoside D_qt | P00742 | FA10_HUMAN  | Homo sapiens (Human) |
| Lucidumoside D_qt | P22894 | MMP8_HUMAN  | Homo sapiens (Human) |
| Lucidumoside D_qt | P28845 | DHI1_HUMAN  | Homo sapiens (Human) |
| Lucidumoside D_qt | P78536 | ADA17_HUMAN | Homo sapiens (Human) |
| Lucidumoside D_qt | P53355 | DAPK1_HUMAN | Homo sapiens (Human) |
| Lucidumoside D_qt | P08069 | IGF1R_HUMAN | Homo sapiens (Human) |
| Lucidumoside D_qt | P00439 | PH4H_HUMAN  | Homo sapiens (Human) |
| Lucidumoside D_qt | P31749 | AKT1_HUMAN  | Homo sapiens (Human) |
| Lucidumoside D_qt | Q06520 | ST2A1_HUMAN | Homo sapiens (Human) |
| Lucidumoside D_qt | P27487 | DPP4_HUMAN  | Homo sapiens (Human) |
| Lucidumoside D_qt | P15056 | BRAF_HUMAN  | Homo sapiens (Human) |
| Lucidumoside D_qt | P43235 | CATK_HUMAN  | Homo sapiens (Human) |
| Lucidumoside D_qt | P09874 | PARP1_HUMAN | Homo sapiens (Human) |
| Lucidumoside D_qt | Q9NVS9 | PNPO_HUMAN  | Homo sapiens (Human) |
| Lucidumoside D_qt | P39900 | MMP12_HUMAN | Homo sapiens (Human) |
| Lucidumoside D_qt | Q00796 | DHSO_HUMAN  | Homo sapiens (Human) |
| Lucidumoside D_qt | P78368 | KC1G2_HUMAN | Homo sapiens (Human) |
| Lucidumoside D_qt | P18031 | PTN1_HUMAN  | Homo sapiens (Human) |
| Lucidumoside D_qt | P11712 | CP2C9_HUMAN | Homo sapiens (Human) |
| Lucidumoside D_qt | Q9BY41 | HDAC8_HUMAN | Homo sapiens (Human) |
| Lucidumoside D_qt | P06239 | LCK_HUMAN   | Homo sapiens (Human) |
| Lucidumoside D_qt | P62508 | ERR3_HUMAN  | Homo sapiens (Human) |
| Lucidumoside D_qt | P34896 | GLYC_HUMAN  | Homo sapiens (Human) |
| Lucidumoside D_qt | Q08881 | ITK_HUMAN   | Homo sapiens (Human) |
| Lucidumoside D_qt | P25311 | ZA2G_HUMAN  | Homo sapiens (Human) |
| Lucidumoside D_qt | P35558 | PCKGC_HUMAN | Homo sapiens (Human) |
| Lucidumoside D_qt | P52333 | JAK3_HUMAN  | Homo sapiens (Human) |
| Specnuezhenide    | P07339 | CATD_HUMAN  | Homo sapiens (Human) |
| Specnuezhenide    | P25774 | CATS_HUMAN  | Homo sapiens (Human) |
| Specnuezhenide    | P23946 | CMA1_HUMAN  | Homo sapiens (Human) |
| Specnuezhenide    | P00918 | CAH2_HUMAN  | Homo sapiens (Human) |
| Specnuezhenide    | P00491 | PNPH_HUMAN  | Homo sapiens (Human) |

|                |        |             |                      |
|----------------|--------|-------------|----------------------|
| Specnuezhenide | P53582 | MAP11_HUMAN | Homo sapiens (Human) |
| Specnuezhenide | P54760 | EPHB4_HUMAN | Homo sapiens (Human) |
| Specnuezhenide | P04745 | AMY1_HUMAN  | Homo sapiens (Human) |
| Specnuezhenide | Q92731 | ESR2_HUMAN  | Homo sapiens (Human) |
| Specnuezhenide | P26196 | DDX6_HUMAN  | Homo sapiens (Human) |
| Specnuezhenide | P55055 | NR1H2_HUMAN | Homo sapiens (Human) |
| Specnuezhenide | P08631 | HCK_HUMAN   | Homo sapiens (Human) |
| Specnuezhenide | P09211 | GSTP1_HUMAN | Homo sapiens (Human) |
| Specnuezhenide | P04062 | GLCM_HUMAN  | Homo sapiens (Human) |
| Specnuezhenide | P62937 | PPIA_HUMAN  | Homo sapiens (Human) |
| Specnuezhenide | P11309 | PIM1_HUMAN  | Homo sapiens (Human) |
| Specnuezhenide | P56817 | BACE1_HUMAN | Homo sapiens (Human) |
| Specnuezhenide | P00749 | UROK_HUMAN  | Homo sapiens (Human) |
| Specnuezhenide | Q9BZR6 | RTN4R_HUMAN | Homo sapiens (Human) |
| Specnuezhenide | P62942 | FKB1A_HUMAN | Homo sapiens (Human) |
| Specnuezhenide | Q9BW91 | NUDT9_HUMAN | Homo sapiens (Human) |
| Specnuezhenide | Q07343 | PDE4B_HUMAN | Homo sapiens (Human) |
| Specnuezhenide | P17342 | ANPRC_HUMAN | Homo sapiens (Human) |
| Specnuezhenide | O14757 | CHK1_HUMAN  | Homo sapiens (Human) |
| Specnuezhenide | P37173 | TGFR2_HUMAN | Homo sapiens (Human) |
| Specnuezhenide | P06276 | CHLE_HUMAN  | Homo sapiens (Human) |
| Specnuezhenide | P00915 | CAH1_HUMAN  | Homo sapiens (Human) |
| Specnuezhenide | O14965 | AURKA_HUMAN | Homo sapiens (Human) |
| Specnuezhenide | P20248 | CCNA2_HUMAN | Homo sapiens (Human) |
| Specnuezhenide | Q12884 | SEPR_HUMAN  | Homo sapiens (Human) |
| Specnuezhenide | P07900 | HS90A_HUMAN | Homo sapiens (Human) |
| Specnuezhenide | P45983 | MK08_HUMAN  | Homo sapiens (Human) |
| Specnuezhenide | Q9NP99 | TREM1_HUMAN | Homo sapiens (Human) |
| Specnuezhenide | P00533 | EGFR_HUMAN  | Homo sapiens (Human) |
| Specnuezhenide | P29218 | IMPA1_HUMAN | Homo sapiens (Human) |
| Specnuezhenide | Q16769 | QPCT_HUMAN  | Homo sapiens (Human) |
| Specnuezhenide | Q05315 | LEG10_HUMAN | Homo sapiens (Human) |
| Specnuezhenide | O43570 | CAH12_HUMAN | Homo sapiens (Human) |
| Specnuezhenide | P24941 | CDK2_HUMAN  | Homo sapiens (Human) |
| Specnuezhenide | P06401 | PRGR_HUMAN  | Homo sapiens (Human) |
| Specnuezhenide | P15121 | ALDR_HUMAN  | Homo sapiens (Human) |
| Specnuezhenide | P03950 | ANGI_HUMAN  | Homo sapiens (Human) |
| Specnuezhenide | Q13126 | MTAP_HUMAN  | Homo sapiens (Human) |
| Specnuezhenide | P17707 | DCAM_HUMAN  | Homo sapiens (Human) |
| Specnuezhenide | Q13231 | CHIT1_HUMAN | Homo sapiens (Human) |
| Specnuezhenide | P47929 | LEG7_HUMAN  | Homo sapiens (Human) |
| Specnuezhenide | P00736 | C1R_HUMAN   | Homo sapiens (Human) |
| Specnuezhenide | P42574 | CASP3_HUMAN | Homo sapiens (Human) |
| Specnuezhenide | P02766 | TTHY_HUMAN  | Homo sapiens (Human) |
| Specnuezhenide | P18075 | BMP7_HUMAN  | Homo sapiens (Human) |
| Specnuezhenide | P11142 | HSP7C_HUMAN | Homo sapiens (Human) |
| Specnuezhenide | P54577 | SYYC_HUMAN  | Homo sapiens (Human) |
| Specnuezhenide | P48449 | ERG7_HUMAN  | Homo sapiens (Human) |
| Specnuezhenide | P19367 | HXK1_HUMAN  | Homo sapiens (Human) |
| Specnuezhenide | P62508 | ERR3_HUMAN  | Homo sapiens (Human) |
| Specnuezhenide | Q00796 | DHSO_HUMAN  | Homo sapiens (Human) |
| Specnuezhenide | P37231 | PPARG_HUMAN | Homo sapiens (Human) |
| Specnuezhenide | P53355 | DAPK1_HUMAN | Homo sapiens (Human) |
| Specnuezhenide | P06737 | PYGL_HUMAN  | Homo sapiens (Human) |
| Specnuezhenide | O60911 | CATL2_HUMAN | Homo sapiens (Human) |
| Specnuezhenide | P00746 | CFAD_HUMAN  | Homo sapiens (Human) |
| Specnuezhenide | Q08499 | PDE4D_HUMAN | Homo sapiens (Human) |
| Specnuezhenide | Q9NVS9 | PNPO_HUMAN  | Homo sapiens (Human) |

|                |        |             |                      |
|----------------|--------|-------------|----------------------|
| Specnuezhenide | P25311 | ZA2G_HUMAN  | Homo sapiens (Human) |
| Specnuezhenide | P52732 | KIF11_HUMAN | Homo sapiens (Human) |
| Specnuezhenide | O76074 | PDE5A_HUMAN | Homo sapiens (Human) |
| Specnuezhenide | P12931 | SRC_HUMAN   | Homo sapiens (Human) |
| Specnuezhenide | P00734 | THRB_HUMAN  | Homo sapiens (Human) |
| Specnuezhenide | P07858 | CATB_HUMAN  | Homo sapiens (Human) |
| Specnuezhenide | P53350 | PLK1_HUMAN  | Homo sapiens (Human) |
| Specnuezhenide | P36897 | TGFR1_HUMAN | Homo sapiens (Human) |
| Specnuezhenide | P00325 | ADH1B_HUMAN | Homo sapiens (Human) |
| Specnuezhenide | Q07912 | ACK1_HUMAN  | Homo sapiens (Human) |
| Specnuezhenide | P00742 | FA10_HUMAN  | Homo sapiens (Human) |
| Specnuezhenide | Q16539 | MK14_HUMAN  | Homo sapiens (Human) |
| Specnuezhenide | P00390 | GSHR_HUMAN  | Homo sapiens (Human) |
| Specnuezhenide | P03372 | ESR1_HUMAN  | Homo sapiens (Human) |
| Specnuezhenide | P19971 | TYPH_HUMAN  | Homo sapiens (Human) |
| Specnuezhenide | P78536 | ADA17_HUMAN | Homo sapiens (Human) |
| Specnuezhenide | P01709 | LV208_HUMAN | Homo sapiens (Human) |
| Specnuezhenide | P14174 | MIF_HUMAN   | Homo sapiens (Human) |
| Specnuezhenide | P55210 | CASP7_HUMAN | Homo sapiens (Human) |
| Specnuezhenide | Q06520 | ST2A1_HUMAN | Homo sapiens (Human) |
| Specnuezhenide | Q13370 | PDE3B_HUMAN | Homo sapiens (Human) |
| Specnuezhenide | P04818 | TYSY_HUMAN  | Homo sapiens (Human) |
| Specnuezhenide | P02743 | SAMP_HUMAN  | Homo sapiens (Human) |
| Specnuezhenide | P39900 | MMP12_HUMAN | Homo sapiens (Human) |
| Specnuezhenide | P00751 | CFAB_HUMAN  | Homo sapiens (Human) |
| Specnuezhenide | P00374 | DYR_HUMAN   | Homo sapiens (Human) |
| Specnuezhenide | P04278 | SHBG_HUMAN  | Homo sapiens (Human) |
| Specnuezhenide | P78368 | KC1G2_HUMAN | Homo sapiens (Human) |
| Specnuezhenide | P29474 | NOS3_HUMAN  | Homo sapiens (Human) |
| Specnuezhenide | O15382 | BCAT2_HUMAN | Homo sapiens (Human) |
| Specnuezhenide | P08254 | MMP3_HUMAN  | Homo sapiens (Human) |
| Specnuezhenide | P00439 | PH4H_HUMAN  | Homo sapiens (Human) |
| Specnuezhenide | P49789 | FHIT_HUMAN  | Homo sapiens (Human) |
| Specnuezhenide | P49841 | GSK3B_HUMAN | Homo sapiens (Human) |
| Specnuezhenide | P45452 | MMP13_HUMAN | Homo sapiens (Human) |
| Specnuezhenide | P07686 | HEXB_HUMAN  | Homo sapiens (Human) |
| Specnuezhenide | P10275 | ANDR_HUMAN  | Homo sapiens (Human) |
| Specnuezhenide | P43405 | KSYK_HUMAN  | Homo sapiens (Human) |
| Specnuezhenide | P53779 | MK10_HUMAN  | Homo sapiens (Human) |
| Specnuezhenide | P08758 | ANXA5_HUMAN | Homo sapiens (Human) |
| Specnuezhenide | P43235 | CATK_HUMAN  | Homo sapiens (Human) |
| Specnuezhenide | P16083 | NQO2_HUMAN  | Homo sapiens (Human) |
| Specnuezhenide | Q02127 | PYRD_HUMAN  | Homo sapiens (Human) |
| Specnuezhenide | P84077 | ARF1_HUMAN  | Homo sapiens (Human) |
| Specnuezhenide | O15530 | PDPK1_HUMAN | Homo sapiens (Human) |
| Specnuezhenide | Q96AZ6 | ISG20_HUMAN | Homo sapiens (Human) |
| Specnuezhenide | P09237 | MMP7_HUMAN  | Homo sapiens (Human) |
| Specnuezhenide | P11586 | C1TC_HUMAN  | Homo sapiens (Human) |
| Specnuezhenide | P31749 | AKT1_HUMAN  | Homo sapiens (Human) |
| Specnuezhenide | P12268 | IMDH2_HUMAN | Homo sapiens (Human) |
| Specnuezhenide | P19793 | RXRA_HUMAN  | Homo sapiens (Human) |
| Specnuezhenide | Q99933 | BAG1_HUMAN  | Homo sapiens (Human) |
| Specnuezhenide | P51570 | GALK1_HUMAN | Homo sapiens (Human) |
| Specnuezhenide | Q96T66 | NMNA3_HUMAN | Homo sapiens (Human) |
| Specnuezhenide | P68400 | CSK21_HUMAN | Homo sapiens (Human) |
| Specnuezhenide | P18031 | PTN1_HUMAN  | Homo sapiens (Human) |
| Specnuezhenide | P22894 | MMP8_HUMAN  | Homo sapiens (Human) |
| Specnuezhenide | P49354 | FNTA_HUMAN  | Homo sapiens (Human) |

|                |        |             |                      |
|----------------|--------|-------------|----------------------|
| Specnuezhenide | P23526 | SAHH_HUMAN  | Homo sapiens (Human) |
| Specnuezhenide | P62166 | NCS1_HUMAN  | Homo sapiens (Human) |
| Specnuezhenide | P08069 | IGF1R_HUMAN | Homo sapiens (Human) |
| Specnuezhenide | Q9P2W7 | B3GA1_HUMAN | Homo sapiens (Human) |
| Specnuezhenide | P04179 | SODM_HUMAN  | Homo sapiens (Human) |
| Specnuezhenide | P28845 | DHI1_HUMAN  | Homo sapiens (Human) |
| Specnuezhenide | P23141 | EST1_HUMAN  | Homo sapiens (Human) |
| Specnuezhenide | P27487 | DPP4_HUMAN  | Homo sapiens (Human) |
| Specnuezhenide | P05451 | REG1A_HUMAN | Homo sapiens (Human) |
| Specnuezhenide | P35968 | VGFR2_HUMAN | Homo sapiens (Human) |
| Specnuezhenide | P35558 | PCKGC_HUMAN | Homo sapiens (Human) |
| Specnuezhenide | P43155 | CACP_HUMAN  | Homo sapiens (Human) |
| Specnuezhenide | Q07960 | RHG01_HUMAN | Homo sapiens (Human) |
| Specnuezhenide | P04035 | HMDH_HUMAN  | Homo sapiens (Human) |
| Specnuezhenide | P04746 | AMYP_HUMAN  | Homo sapiens (Human) |
| Specnuezhenide | Q08188 | TGM3_HUMAN  | Homo sapiens (Human) |
| Specnuezhenide | P11362 | FGFR1_HUMAN | Homo sapiens (Human) |
| Specnuezhenide | Q03181 | PPARD_HUMAN | Homo sapiens (Human) |
| Specnuezhenide | Q15382 | RHEB_HUMAN  | Homo sapiens (Human) |
| Specnuezhenide | Q9BZX2 | UCK2_HUMAN  | Homo sapiens (Human) |
| Specnuezhenide | P50579 | MAP2_HUMAN  | Homo sapiens (Human) |
| Specnuezhenide | P27338 | AOFB_HUMAN  | Homo sapiens (Human) |
| Specnuezhenide | P60568 | IL2_HUMAN   | Homo sapiens (Human) |
| Oleanolic acid | P08842 | STS_HUMAN   | Homo sapiens (Human) |
| Oleanolic acid | P02768 | ALBU_HUMAN  | Homo sapiens (Human) |
| Oleanolic acid | P35968 | VGFR2_HUMAN | Homo sapiens (Human) |
| Oleanolic acid | P53779 | MK10_HUMAN  | Homo sapiens (Human) |
| Oleanolic acid | P08254 | MMP3_HUMAN  | Homo sapiens (Human) |
| Oleanolic acid | P12643 | BMP2_HUMAN  | Homo sapiens (Human) |
| Oleanolic acid | P10828 | THB_HUMAN   | Homo sapiens (Human) |
| Oleanolic acid | P27338 | AOFB_HUMAN  | Homo sapiens (Human) |
| Oleanolic acid | P45452 | MMP13_HUMAN | Homo sapiens (Human) |
| Oleanolic acid | P11309 | PIM1_HUMAN  | Homo sapiens (Human) |
| Oleanolic acid | P00918 | CAH2_HUMAN  | Homo sapiens (Human) |
| Oleanolic acid | P49137 | MAPK2_HUMAN | Homo sapiens (Human) |
| Oleanolic acid | P02652 | APOA2_HUMAN | Homo sapiens (Human) |
| Oleanolic acid | P52895 | AKIC2_HUMAN | Homo sapiens (Human) |
| Oleanolic acid | Q8NBQ5 | DHB11_HUMAN | Homo sapiens (Human) |
| Oleanolic acid | P62937 | PPIA_HUMAN  | Homo sapiens (Human) |
| Oleanolic acid | P00751 | CFAB_HUMAN  | Homo sapiens (Human) |
| Oleanolic acid | P52732 | KIF11_HUMAN | Homo sapiens (Human) |
| Oleanolic acid | P06276 | CHLE_HUMAN  | Homo sapiens (Human) |
| Oleanolic acid | P00734 | THRB_HUMAN  | Homo sapiens (Human) |
| Oleanolic acid | P28482 | MK01_HUMAN  | Homo sapiens (Human) |
| Oleanolic acid | P02774 | VTDB_HUMAN  | Homo sapiens (Human) |
| Oleanolic acid | P20701 | ITAL_HUMAN  | Homo sapiens (Human) |
| Oleanolic acid | P55210 | CASP7_HUMAN | Homo sapiens (Human) |
| Oleanolic acid | P02766 | TTHY_HUMAN  | Homo sapiens (Human) |
| Oleanolic acid | P56817 | BACE1_HUMAN | Homo sapiens (Human) |
| Oleanolic acid | Q06520 | ST2A1_HUMAN | Homo sapiens (Human) |
| Oleanolic acid | P00915 | CAH1_HUMAN  | Homo sapiens (Human) |
| Oleanolic acid | Q02127 | PYRD_HUMAN  | Homo sapiens (Human) |
| Oleanolic acid | P09211 | GSTP1_HUMAN | Homo sapiens (Human) |
| Oleanolic acid | P06401 | PRGR_HUMAN  | Homo sapiens (Human) |
| Oleanolic acid | P35398 | RORA_HUMAN  | Homo sapiens (Human) |
| Oleanolic acid | P09874 | PARP1_HUMAN | Homo sapiens (Human) |
| Oleanolic acid | P10275 | ANDR_HUMAN  | Homo sapiens (Human) |
| Oleanolic acid | P14061 | DHB1_HUMAN  | Homo sapiens (Human) |

|                |        |             |                      |
|----------------|--------|-------------|----------------------|
| Oleanolic acid | P08235 | MCR_HUMAN   | Homo sapiens (Human) |
| Oleanolic acid | P28845 | DHI1_HUMAN  | Homo sapiens (Human) |
| Oleanolic acid | P53041 | PPP5_HUMAN  | Homo sapiens (Human) |
| Oleanolic acid | P37231 | PPARG_HUMAN | Homo sapiens (Human) |
| Oleanolic acid | P12931 | SRC_HUMAN   | Homo sapiens (Human) |
| Oleanolic acid | P20248 | CCNA2_HUMAN | Homo sapiens (Human) |
| Oleanolic acid | O43617 | TPPC3_HUMAN | Homo sapiens (Human) |
| Oleanolic acid | P29474 | NOS3_HUMAN  | Homo sapiens (Human) |
| Oleanolic acid | O15530 | PDPK1_HUMAN | Homo sapiens (Human) |
| Oleanolic acid | P45983 | MK08_HUMAN  | Homo sapiens (Human) |
| Oleanolic acid | P24941 | CDK2_HUMAN  | Homo sapiens (Human) |
| Oleanolic acid | P03372 | ESR1_HUMAN  | Homo sapiens (Human) |
| Oleanolic acid | P78536 | ADA17_HUMAN | Homo sapiens (Human) |
| Oleanolic acid | O14965 | AURKA_HUMAN | Homo sapiens (Human) |
| Oleanolic acid | P00746 | CFAD_HUMAN  | Homo sapiens (Human) |
| Oleanolic acid | P00326 | ADH1G_HUMAN | Homo sapiens (Human) |
| Oleanolic acid | O14757 | CHK1_HUMAN  | Homo sapiens (Human) |
| Oleanolic acid | P49354 | FNTA_HUMAN  | Homo sapiens (Human) |
| Oleanolic acid | P00325 | ADH1B_HUMAN | Homo sapiens (Human) |
| Oleanolic acid | Q16539 | MK14_HUMAN  | Homo sapiens (Human) |
| Oleanolic acid | Q07343 | PDE4B_HUMAN | Homo sapiens (Human) |
| Oleanolic acid | O76054 | S14L2_HUMAN | Homo sapiens (Human) |
| Oleanolic acid | P11766 | ADHX_HUMAN  | Homo sapiens (Human) |
| Oleanolic acid | Q08499 | PDE4D_HUMAN | Homo sapiens (Human) |
| Oleanolic acid | O15496 | PA2GX_HUMAN | Homo sapiens (Human) |
| Oleanolic acid | P04278 | SHBG_HUMAN  | Homo sapiens (Human) |
| Oleanolic acid | P62508 | ERR3_HUMAN  | Homo sapiens (Human) |
| Oleanolic acid | Q06124 | PTN11_HUMAN | Homo sapiens (Human) |
| Oleanolic acid | Q16828 | DUS6_HUMAN  | Homo sapiens (Human) |
| Oleanolic acid | P08758 | ANXA5_HUMAN | Homo sapiens (Human) |
| Oleanolic acid | P23141 | EST1_HUMAN  | Homo sapiens (Human) |
| Oleanolic acid | Q04828 | AK1C1_HUMAN | Homo sapiens (Human) |
| Oleanolic acid | P54760 | EPHB4_HUMAN | Homo sapiens (Human) |
| Oleanolic acid | P63316 | TNNC1_HUMAN | Homo sapiens (Human) |
| Oleanolic acid | P00797 | RENI_HUMAN  | Homo sapiens (Human) |
| Oleanolic acid | P00533 | EGFR_HUMAN  | Homo sapiens (Human) |
| Oleanolic acid | Q96RI1 | NR1H4_HUMAN | Homo sapiens (Human) |
| Oleanolic acid | P55055 | NR1H2_HUMAN | Homo sapiens (Human) |
| Oleanolic acid | Q9BY41 | HDAC8_HUMAN | Homo sapiens (Human) |
| Oleanolic acid | P07900 | HS90A_HUMAN | Homo sapiens (Human) |
| Oleanolic acid | P27487 | DPP4_HUMAN  | Homo sapiens (Human) |
| Oleanolic acid | P15056 | BRAF_HUMAN  | Homo sapiens (Human) |
| Oleanolic acid | P15121 | ALDR_HUMAN  | Homo sapiens (Human) |
| Oleanolic acid | Q00796 | DHSO_HUMAN  | Homo sapiens (Human) |
| Oleanolic acid | P00390 | GSHR_HUMAN  | Homo sapiens (Human) |
| Oleanolic acid | P0DP23 | CALM1_HUMAN | Homo sapiens (Human) |
| Oleanolic acid | P0DP24 | CALM2_HUMAN | Homo sapiens (Human) |
| Oleanolic acid | P0DP25 | CALM3_HUMAN | Homo sapiens (Human) |
| Oleanolic acid | P06239 | LCK_HUMAN   | Homo sapiens (Human) |
| Oleanolic acid | P08581 | MET_HUMAN   | Homo sapiens (Human) |
| Oleanolic acid | O60760 | HPGDS_HUMAN | Homo sapiens (Human) |
| Oleanolic acid | Q13231 | CHIT1_HUMAN | Homo sapiens (Human) |
| Oleanolic acid | P49763 | PLGF_HUMAN  | Homo sapiens (Human) |
| Oleanolic acid | P08263 | GSTA1_HUMAN | Homo sapiens (Human) |
| Oleanolic acid | O15382 | BCAT2_HUMAN | Homo sapiens (Human) |
| Oleanolic acid | P18031 | PTN1_HUMAN  | Homo sapiens (Human) |
| Oleanolic acid | P06746 | DPOLB_HUMAN | Homo sapiens (Human) |
| Oleanolic acid | O60218 | AK1BA_HUMAN | Homo sapiens (Human) |

|                |        |             |                      |
|----------------|--------|-------------|----------------------|
| Oleanolic acid | P51449 | RORG_HUMAN  | Homo sapiens (Human) |
| Oleanolic acid | P10586 | PTPRF_HUMAN | Homo sapiens (Human) |
| Oleanolic acid | P17706 | PTN2_HUMAN  | Homo sapiens (Human) |
| Oleanolic acid | P24666 | PPAC_HUMAN  | Homo sapiens (Human) |
| Oleanolic acid | P30305 | MPIP2_HUMAN | Homo sapiens (Human) |
| Salidroside    | P00918 | CAH2_HUMAN  | Homo sapiens (Human) |
| Salidroside    | P56817 | BACE1_HUMAN | Homo sapiens (Human) |
| Salidroside    | Q92731 | ESR2_HUMAN  | Homo sapiens (Human) |
| Salidroside    | P07339 | CATD_HUMAN  | Homo sapiens (Human) |
| Salidroside    | Q9BW91 | NUDT9_HUMAN | Homo sapiens (Human) |
| Salidroside    | P25774 | CATS_HUMAN  | Homo sapiens (Human) |
| Salidroside    | P54760 | EPHB4_HUMAN | Homo sapiens (Human) |
| Salidroside    | Q13126 | MTAP_HUMAN  | Homo sapiens (Human) |
| Salidroside    | P53582 | MAP11_HUMAN | Homo sapiens (Human) |
| Salidroside    | P04062 | GLCM_HUMAN  | Homo sapiens (Human) |
| Salidroside    | P37173 | TGFR2_HUMAN | Homo sapiens (Human) |
| Salidroside    | P11309 | PIM1_HUMAN  | Homo sapiens (Human) |
| Salidroside    | P08631 | HCK_HUMAN   | Homo sapiens (Human) |
| Salidroside    | P20248 | CCNA2_HUMAN | Homo sapiens (Human) |
| Salidroside    | P62942 | FKB1A_HUMAN | Homo sapiens (Human) |
| Salidroside    | P04745 | AMY1_HUMAN  | Homo sapiens (Human) |
| Salidroside    | P62937 | PPIA_HUMAN  | Homo sapiens (Human) |
| Salidroside    | O14757 | CHK1_HUMAN  | Homo sapiens (Human) |
| Salidroside    | O14965 | AURKA_HUMAN | Homo sapiens (Human) |
| Salidroside    | P28482 | MK01_HUMAN  | Homo sapiens (Human) |
| Salidroside    | P09211 | GSTP1_HUMAN | Homo sapiens (Human) |
| Salidroside    | P15121 | ALDR_HUMAN  | Homo sapiens (Human) |
| Salidroside    | P03372 | ESR1_HUMAN  | Homo sapiens (Human) |
| Salidroside    | P17342 | ANPRC_HUMAN | Homo sapiens (Human) |
| Salidroside    | Q12884 | SEPR_HUMAN  | Homo sapiens (Human) |
| Salidroside    | P00915 | CAH1_HUMAN  | Homo sapiens (Human) |
| Salidroside    | P24941 | CDK2_HUMAN  | Homo sapiens (Human) |
| Salidroside    | P06276 | CHLE_HUMAN  | Homo sapiens (Human) |
| Salidroside    | P29218 | IMPA1_HUMAN | Homo sapiens (Human) |
| Salidroside    | Q07343 | PDE4B_HUMAN | Homo sapiens (Human) |
| Salidroside    | P11142 | HSP7C_HUMAN | Homo sapiens (Human) |
| Salidroside    | Q05315 | LEG10_HUMAN | Homo sapiens (Human) |
| Salidroside    | O43570 | CAH12_HUMAN | Homo sapiens (Human) |
| Salidroside    | P07900 | HS90A_HUMAN | Homo sapiens (Human) |
| Salidroside    | P55055 | NR1H2_HUMAN | Homo sapiens (Human) |
| Salidroside    | P06401 | PRGR_HUMAN  | Homo sapiens (Human) |
| Salidroside    | P23946 | CMA1_HUMAN  | Homo sapiens (Human) |
| Salidroside    | P19367 | HXK1_HUMAN  | Homo sapiens (Human) |
| Salidroside    | P26196 | DDX6_HUMAN  | Homo sapiens (Human) |
| Salidroside    | O60911 | CATL2_HUMAN | Homo sapiens (Human) |
| Salidroside    | P42574 | CASP3_HUMAN | Homo sapiens (Human) |
| Salidroside    | P00491 | PNPH_HUMAN  | Homo sapiens (Human) |
| Salidroside    | Q16769 | QPCT_HUMAN  | Homo sapiens (Human) |
| Salidroside    | P00533 | EGFR_HUMAN  | Homo sapiens (Human) |
| Salidroside    | Q15078 | CD5R1_HUMAN | Homo sapiens (Human) |
| Salidroside    | P54577 | SYYC_HUMAN  | Homo sapiens (Human) |
| Salidroside    | P51570 | GALK1_HUMAN | Homo sapiens (Human) |
| Salidroside    | P53355 | DAPK1_HUMAN | Homo sapiens (Human) |
| Salidroside    | P28845 | DHI1_HUMAN  | Homo sapiens (Human) |
| Salidroside    | P02766 | TTHY_HUMAN  | Homo sapiens (Human) |
| Salidroside    | P52732 | KIF11_HUMAN | Homo sapiens (Human) |
| Salidroside    | P00734 | THRB_HUMAN  | Homo sapiens (Human) |
| Salidroside    | P00746 | CFAD_HUMAN  | Homo sapiens (Human) |



|             |        |             |                      |
|-------------|--------|-------------|----------------------|
| Salidroside | Q16539 | MK14_HUMAN  | Homo sapiens (Human) |
| Salidroside | P14174 | MIF_HUMAN   | Homo sapiens (Human) |
| Salidroside | P12931 | SRC_HUMAN   | Homo sapiens (Human) |
| Salidroside | P29474 | NOS3_HUMAN  | Homo sapiens (Human) |
| Salidroside | P17707 | DCAM_HUMAN  | Homo sapiens (Human) |
| Salidroside | Q07912 | ACK1_HUMAN  | Homo sapiens (Human) |
| Salidroside | P10275 | ANDR_HUMAN  | Homo sapiens (Human) |
| Salidroside | Q9NVS9 | PNPO_HUMAN  | Homo sapiens (Human) |
| Salidroside | P37231 | PPARG_HUMAN | Homo sapiens (Human) |
| Salidroside | P00325 | ADH1B_HUMAN | Homo sapiens (Human) |
| Salidroside | P03950 | ANGI_HUMAN  | Homo sapiens (Human) |
| Salidroside | P62508 | ERR3_HUMAN  | Homo sapiens (Human) |
| Salidroside | O76074 | PDE5A_HUMAN | Homo sapiens (Human) |
| Salidroside | P06737 | PYGL_HUMAN  | Homo sapiens (Human) |
| Salidroside | P78536 | ADA17_HUMAN | Homo sapiens (Human) |
| Salidroside | P07858 | CATB_HUMAN  | Homo sapiens (Human) |
| Salidroside | P00374 | DYR_HUMAN   | Homo sapiens (Human) |
| Salidroside | Q08499 | PDE4D_HUMAN | Homo sapiens (Human) |
| Salidroside | P31749 | AKT1_HUMAN  | Homo sapiens (Human) |
| Salidroside | P08758 | ANXA5_HUMAN | Homo sapiens (Human) |
| Salidroside | P36897 | TGFR1_HUMAN | Homo sapiens (Human) |
| Salidroside | Q13370 | PDE3B_HUMAN | Homo sapiens (Human) |
| Salidroside | P04818 | TYSY_HUMAN  | Homo sapiens (Human) |
| Salidroside | P00797 | RENI_HUMAN  | Homo sapiens (Human) |
| Salidroside | P55210 | CASP7_HUMAN | Homo sapiens (Human) |
| Salidroside | P04278 | SHBG_HUMAN  | Homo sapiens (Human) |
| Salidroside | P04035 | HMDH_HUMAN  | Homo sapiens (Human) |
| Salidroside | P45452 | MMP13_HUMAN | Homo sapiens (Human) |
| Salidroside | P18075 | BMP7_HUMAN  | Homo sapiens (Human) |
| Salidroside | P68400 | CSK21_HUMAN | Homo sapiens (Human) |
| Salidroside | P00751 | CFAB_HUMAN  | Homo sapiens (Human) |
| Salidroside | P53779 | MK10_HUMAN  | Homo sapiens (Human) |
| Salidroside | P00390 | GSHR_HUMAN  | Homo sapiens (Human) |
| Salidroside | P48449 | ERG7_HUMAN  | Homo sapiens (Human) |
| Salidroside | P06239 | LCK_HUMAN   | Homo sapiens (Human) |
| Salidroside | P78368 | KC1G2_HUMAN | Homo sapiens (Human) |
| Salidroside | P27487 | DPP4_HUMAN  | Homo sapiens (Human) |
| Salidroside | P00439 | PH4H_HUMAN  | Homo sapiens (Human) |
| Salidroside | P35968 | VGFR2_HUMAN | Homo sapiens (Human) |
| Salidroside | P16083 | NQO2_HUMAN  | Homo sapiens (Human) |
| Salidroside | P07686 | HEXB_HUMAN  | Homo sapiens (Human) |
| Salidroside | O15530 | PDPK1_HUMAN | Homo sapiens (Human) |
| Salidroside | P01709 | LV208_HUMAN | Homo sapiens (Human) |
| Salidroside | P19971 | TYPH_HUMAN  | Homo sapiens (Human) |
| Salidroside | P25311 | ZA2G_HUMAN  | Homo sapiens (Human) |
| Salidroside | P53350 | PLK1_HUMAN  | Homo sapiens (Human) |
| Salidroside | P43155 | CACP_HUMAN  | Homo sapiens (Human) |
| Salidroside | Q06520 | ST2A1_HUMAN | Homo sapiens (Human) |
| Salidroside | P43235 | CATK_HUMAN  | Homo sapiens (Human) |
| Salidroside | Q99933 | BAG1_HUMAN  | Homo sapiens (Human) |
| Salidroside | P00742 | FA10_HUMAN  | Homo sapiens (Human) |
| Salidroside | Q02127 | PYRD_HUMAN  | Homo sapiens (Human) |
| Salidroside | Q08881 | ITK_HUMAN   | Homo sapiens (Human) |
| Salidroside | P45983 | MK08_HUMAN  | Homo sapiens (Human) |
| Salidroside | P08254 | MMP3_HUMAN  | Homo sapiens (Human) |
| Salidroside | P11362 | FGFR1_HUMAN | Homo sapiens (Human) |
| Salidroside | P00736 | C1R_HUMAN   | Homo sapiens (Human) |
| Salidroside | Q9P2W7 | B3GA1_HUMAN | Homo sapiens (Human) |

|                                           |        |             |                      |
|-------------------------------------------|--------|-------------|----------------------|
| Salidroside                               | P32320 | CDD_HUMAN   | Homo sapiens (Human) |
| Salidroside                               | P35558 | PCKGC_HUMAN | Homo sapiens (Human) |
| Salidroside                               | P22894 | MMP8_HUMAN  | Homo sapiens (Human) |
| Salidroside                               | P05451 | REG1A_HUMAN | Homo sapiens (Human) |
| Salidroside                               | P49841 | GSK3B_HUMAN | Homo sapiens (Human) |
| Salidroside                               | P47929 | LEG7_HUMAN  | Homo sapiens (Human) |
| Salidroside                               | P11586 | C1TC_HUMAN  | Homo sapiens (Human) |
| Salidroside                               | Q00534 | CDK6_HUMAN  | Homo sapiens (Human) |
| Salidroside                               | P23526 | SAHH_HUMAN  | Homo sapiens (Human) |
| Salidroside                               | P18031 | PTN1_HUMAN  | Homo sapiens (Human) |
| Salidroside                               | P08069 | IGF1R_HUMAN | Homo sapiens (Human) |
| Salidroside                               | P08235 | MCR_HUMAN   | Homo sapiens (Human) |
| Salidroside                               | P04179 | SODM_HUMAN  | Homo sapiens (Human) |
| Salidroside                               | P34913 | HYES_HUMAN  | Homo sapiens (Human) |
| Salidroside                               | P16442 | BGAT_HUMAN  | Homo sapiens (Human) |
| Salidroside                               | P15309 | PPAP_HUMAN  | Homo sapiens (Human) |
| Salidroside                               | P27707 | DCK_HUMAN   | Homo sapiens (Human) |
| (20S)-24-ene-3 $\beta$ ,20-diol-3-acetate | P27338 | AOFB_HUMAN  | Homo sapiens (Human) |
| (20S)-24-ene-3 $\beta$ ,20-diol-3-acetate | P53779 | MK10_HUMAN  | Homo sapiens (Human) |
| (20S)-24-ene-3 $\beta$ ,20-diol-3-acetate | P12643 | BMP2_HUMAN  | Homo sapiens (Human) |
| (20S)-24-ene-3 $\beta$ ,20-diol-3-acetate | P00918 | CAH2_HUMAN  | Homo sapiens (Human) |
| (20S)-24-ene-3 $\beta$ ,20-diol-3-acetate | Q16539 | MK14_HUMAN  | Homo sapiens (Human) |
| (20S)-24-ene-3 $\beta$ ,20-diol-3-acetate | P08254 | MMP3_HUMAN  | Homo sapiens (Human) |
| (20S)-24-ene-3 $\beta$ ,20-diol-3-acetate | P49137 | MAPK2_HUMAN | Homo sapiens (Human) |
| (20S)-24-ene-3 $\beta$ ,20-diol-3-acetate | P52895 | AK1C2_HUMAN | Homo sapiens (Human) |
| (20S)-24-ene-3 $\beta$ ,20-diol-3-acetate | P00751 | CFAB_HUMAN  | Homo sapiens (Human) |
| (20S)-24-ene-3 $\beta$ ,20-diol-3-acetate | P08842 | STS_HUMAN   | Homo sapiens (Human) |
| (20S)-24-ene-3 $\beta$ ,20-diol-3-acetate | P28482 | MK01_HUMAN  | Homo sapiens (Human) |
| (20S)-24-ene-3 $\beta$ ,20-diol-3-acetate | P02766 | TTHY_HUMAN  | Homo sapiens (Human) |
| (20S)-24-ene-3 $\beta$ ,20-diol-3-acetate | P62937 | PPIA_HUMAN  | Homo sapiens (Human) |
| (20S)-24-ene-3 $\beta$ ,20-diol-3-acetate | P45452 | MMP13_HUMAN | Homo sapiens (Human) |
| (20S)-24-ene-3 $\beta$ ,20-diol-3-acetate | Q92731 | ESR2_HUMAN  | Homo sapiens (Human) |
| (20S)-24-ene-3 $\beta$ ,20-diol-3-acetate | P02652 | APOA2_HUMAN | Homo sapiens (Human) |
| (20S)-24-ene-3 $\beta$ ,20-diol-3-acetate | P02768 | ALBU_HUMAN  | Homo sapiens (Human) |
| (20S)-24-ene-3 $\beta$ ,20-diol-3-acetate | P52732 | KIF11_HUMAN | Homo sapiens (Human) |
| (20S)-24-ene-3 $\beta$ ,20-diol-3-acetate | P11309 | PIM1_HUMAN  | Homo sapiens (Human) |
| (20S)-24-ene-3 $\beta$ ,20-diol-3-acetate | P45983 | MK08_HUMAN  | Homo sapiens (Human) |
| (20S)-24-ene-3 $\beta$ ,20-diol-3-acetate | P00734 | THRB_HUMAN  | Homo sapiens (Human) |
| (20S)-24-ene-3 $\beta$ ,20-diol-3-acetate | P35968 | VGFR2_HUMAN | Homo sapiens (Human) |
| (20S)-24-ene-3 $\beta$ ,20-diol-3-acetate | P10275 | ANDR_HUMAN  | Homo sapiens (Human) |
| (20S)-24-ene-3 $\beta$ ,20-diol-3-acetate | Q8NBQ5 | DHB11_HUMAN | Homo sapiens (Human) |
| (20S)-24-ene-3 $\beta$ ,20-diol-3-acetate | P02774 | VTDB_HUMAN  | Homo sapiens (Human) |
| (20S)-24-ene-3 $\beta$ ,20-diol-3-acetate | P06276 | CHLE_HUMAN  | Homo sapiens (Human) |
| (20S)-24-ene-3 $\beta$ ,20-diol-3-acetate | P06401 | PRGR_HUMAN  | Homo sapiens (Human) |
| (20S)-24-ene-3 $\beta$ ,20-diol-3-acetate | P23141 | EST1_HUMAN  | Homo sapiens (Human) |
| (20S)-24-ene-3 $\beta$ ,20-diol-3-acetate | P03372 | ESR1_HUMAN  | Homo sapiens (Human) |
| (20S)-24-ene-3 $\beta$ ,20-diol-3-acetate | P15121 | ALDR_HUMAN  | Homo sapiens (Human) |
| (20S)-24-ene-3 $\beta$ ,20-diol-3-acetate | P10828 | THB_HUMAN   | Homo sapiens (Human) |
| (20S)-24-ene-3 $\beta$ ,20-diol-3-acetate | P20248 | CCNA2_HUMAN | Homo sapiens (Human) |
| (20S)-24-ene-3 $\beta$ ,20-diol-3-acetate | P11511 | CP19A_HUMAN | Homo sapiens (Human) |
| (20S)-24-ene-3 $\beta$ ,20-diol-3-acetate | P63316 | TNNC1_HUMAN | Homo sapiens (Human) |
| (20S)-24-ene-3 $\beta$ ,20-diol-3-acetate | P55210 | CASP7_HUMAN | Homo sapiens (Human) |
| (20S)-24-ene-3 $\beta$ ,20-diol-3-acetate | Q06520 | ST2A1_HUMAN | Homo sapiens (Human) |
| (20S)-24-ene-3 $\beta$ ,20-diol-3-acetate | P24941 | CDK2_HUMAN  | Homo sapiens (Human) |
| (20S)-24-ene-3 $\beta$ ,20-diol-3-acetate | Q02127 | PYRD_HUMAN  | Homo sapiens (Human) |
| (20S)-24-ene-3 $\beta$ ,20-diol-3-acetate | O76074 | PDE5A_HUMAN | Homo sapiens (Human) |
| (20S)-24-ene-3 $\beta$ ,20-diol-3-acetate | P09211 | GSTP1_HUMAN | Homo sapiens (Human) |
| (20S)-24-ene-3 $\beta$ ,20-diol-3-acetate | P20701 | ITAL_HUMAN  | Homo sapiens (Human) |

|                                           |        |             |                      |
|-------------------------------------------|--------|-------------|----------------------|
| (20S)-24-ene-3 $\beta$ ,20-diol-3-acetate | P54760 | EPHB4_HUMAN | Homo sapiens (Human) |
| (20S)-24-ene-3 $\beta$ ,20-diol-3-acetate | P08235 | MCR_HUMAN   | Homo sapiens (Human) |
| (20S)-24-ene-3 $\beta$ ,20-diol-3-acetate | P35398 | RORA_HUMAN  | Homo sapiens (Human) |
| (20S)-24-ene-3 $\beta$ ,20-diol-3-acetate | P78536 | ADA17_HUMAN | Homo sapiens (Human) |
| (20S)-24-ene-3 $\beta$ ,20-diol-3-acetate | P37231 | PPARG_HUMAN | Homo sapiens (Human) |
| (20S)-24-ene-3 $\beta$ ,20-diol-3-acetate | P08758 | ANXA5_HUMAN | Homo sapiens (Human) |
| (20S)-24-ene-3 $\beta$ ,20-diol-3-acetate | O14757 | CHK1_HUMAN  | Homo sapiens (Human) |
| (20S)-24-ene-3 $\beta$ ,20-diol-3-acetate | P19793 | RXRA_HUMAN  | Homo sapiens (Human) |
| (20S)-24-ene-3 $\beta$ ,20-diol-3-acetate | Q03181 | PPARD_HUMAN | Homo sapiens (Human) |
| (20S)-24-ene-3 $\beta$ ,20-diol-3-acetate | P14061 | DHB1_HUMAN  | Homo sapiens (Human) |
| (20S)-24-ene-3 $\beta$ ,20-diol-3-acetate | Q96RI1 | NR1H4_HUMAN | Homo sapiens (Human) |
| (20S)-24-ene-3 $\beta$ ,20-diol-3-acetate | P04278 | SHBG_HUMAN  | Homo sapiens (Human) |
| (20S)-24-ene-3 $\beta$ ,20-diol-3-acetate | P29474 | NOS3_HUMAN  | Homo sapiens (Human) |
| (20S)-24-ene-3 $\beta$ ,20-diol-3-acetate | Q13126 | MTAP_HUMAN  | Homo sapiens (Human) |
| (20S)-24-ene-3 $\beta$ ,20-diol-3-acetate | P18031 | PTN1_HUMAN  | Homo sapiens (Human) |
| (20S)-24-ene-3 $\beta$ ,20-diol-3-acetate | P00742 | FA10_HUMAN  | Homo sapiens (Human) |
| (20S)-24-ene-3 $\beta$ ,20-diol-3-acetate | Q07343 | PDE4B_HUMAN | Homo sapiens (Human) |
| (20S)-24-ene-3 $\beta$ ,20-diol-3-acetate | P53350 | PLK1_HUMAN  | Homo sapiens (Human) |
| (20S)-24-ene-3 $\beta$ ,20-diol-3-acetate | P53041 | PPP5_HUMAN  | Homo sapiens (Human) |
| (20S)-24-ene-3 $\beta$ ,20-diol-3-acetate | P50579 | MAP2_HUMAN  | Homo sapiens (Human) |
| (20S)-24-ene-3 $\beta$ ,20-diol-3-acetate | O76054 | S14L2_HUMAN | Homo sapiens (Human) |
| (20S)-24-ene-3 $\beta$ ,20-diol-3-acetate | P12931 | SRC_HUMAN   | Homo sapiens (Human) |
| (20S)-24-ene-3 $\beta$ ,20-diol-3-acetate | P00533 | EGFR_HUMAN  | Homo sapiens (Human) |
| (20S)-24-ene-3 $\beta$ ,20-diol-3-acetate | P22894 | MMP8_HUMAN  | Homo sapiens (Human) |
| (20S)-24-ene-3 $\beta$ ,20-diol-3-acetate | P56817 | BACE1_HUMAN | Homo sapiens (Human) |
| (20S)-24-ene-3 $\beta$ ,20-diol-3-acetate | P49354 | FNTA_HUMAN  | Homo sapiens (Human) |
| (20S)-24-ene-3 $\beta$ ,20-diol-3-acetate | P15056 | BRAF_HUMAN  | Homo sapiens (Human) |
| (20S)-24-ene-3 $\beta$ ,20-diol-3-acetate | P42574 | CASP3_HUMAN | Homo sapiens (Human) |
| (20S)-24-ene-3 $\beta$ ,20-diol-3-acetate | O15382 | BCAT2_HUMAN | Homo sapiens (Human) |
| (20S)-24-ene-3 $\beta$ ,20-diol-3-acetate | P11142 | HSP7C_HUMAN | Homo sapiens (Human) |
| (20S)-24-ene-3 $\beta$ ,20-diol-3-acetate | P00390 | GSHR_HUMAN  | Homo sapiens (Human) |
| (20S)-24-ene-3 $\beta$ ,20-diol-3-acetate | P00325 | ADH1B_HUMAN | Homo sapiens (Human) |
| (20S)-24-ene-3 $\beta$ ,20-diol-3-acetate | P00374 | DYR_HUMAN   | Homo sapiens (Human) |
| (20S)-24-ene-3 $\beta$ ,20-diol-3-acetate | P28845 | DH11_HUMAN  | Homo sapiens (Human) |
| (20S)-24-ene-3 $\beta$ ,20-diol-3-acetate | P42330 | AK1C3_HUMAN | Homo sapiens (Human) |
| (20S)-24-ene-3 $\beta$ ,20-diol-3-acetate | P04818 | TYSY_HUMAN  | Homo sapiens (Human) |
| (20S)-24-ene-3 $\beta$ ,20-diol-3-acetate | P36897 | TGFR1_HUMAN | Homo sapiens (Human) |
| (20S)-24-ene-3 $\beta$ ,20-diol-3-acetate | P11362 | FGFR1_HUMAN | Homo sapiens (Human) |
| (20S)-24-ene-3 $\beta$ ,20-diol-3-acetate | P16083 | NQO2_HUMAN  | Homo sapiens (Human) |
| (20S)-24-ene-3 $\beta$ ,20-diol-3-acetate | P27487 | DPP4_HUMAN  | Homo sapiens (Human) |
| (20S)-24-ene-3 $\beta$ ,20-diol-3-acetate | P06239 | LCK_HUMAN   | Homo sapiens (Human) |
| (20S)-24-ene-3 $\beta$ ,20-diol-3-acetate | Q16828 | DUS6_HUMAN  | Homo sapiens (Human) |
| (20S)-24-ene-3 $\beta$ ,20-diol-3-acetate | Q06124 | PTN11_HUMAN | Homo sapiens (Human) |
| (20S)-24-ene-3 $\beta$ ,20-diol-3-acetate | P42768 | WASP_HUMAN  | Homo sapiens (Human) |
| (20S)-24-ene-3 $\beta$ ,20-diol-3-acetate | P21802 | FGFR2_HUMAN | Homo sapiens (Human) |
| (20S)-24-ene-3 $\beta$ ,20-diol-3-acetate | P62508 | ERR3_HUMAN  | Homo sapiens (Human) |
| (20S)-24-ene-3 $\beta$ ,20-diol-3-acetate | P09874 | PARP1_HUMAN | Homo sapiens (Human) |
| (20S)-24-ene-3 $\beta$ ,20-diol-3-acetate | P48449 | ERG7_HUMAN  | Homo sapiens (Human) |
| (20S)-24-ene-3 $\beta$ ,20-diol-3-acetate | P00326 | ADH1G_HUMAN | Homo sapiens (Human) |
| (20S)-24-ene-3 $\beta$ ,20-diol-3-acetate | O15530 | PDPK1_HUMAN | Homo sapiens (Human) |
| (20S)-24-ene-3 $\beta$ ,20-diol-3-acetate | Q08499 | PDE4D_HUMAN | Homo sapiens (Human) |
| (20S)-24-ene-3 $\beta$ ,20-diol-3-acetate | Q00987 | MDM2_HUMAN  | Homo sapiens (Human) |
| (20S)-24-ene-3 $\beta$ ,20-diol-3-acetate | P15559 | NQO1_HUMAN  | Homo sapiens (Human) |
| (20S)-24-ene-3 $\beta$ ,20-diol-3-acetate | Q00796 | DHSO_HUMAN  | Homo sapiens (Human) |
| (20S)-24-ene-3 $\beta$ ,20-diol-3-acetate | P11474 | ERR1_HUMAN  | Homo sapiens (Human) |
| (20S)-24-ene-3 $\beta$ ,20-diol-3-acetate | P49841 | GSK3B_HUMAN | Homo sapiens (Human) |
| (20S)-24-ene-3 $\beta$ ,20-diol-3-acetate | P0DP23 | CALM1_HUMAN | Homo sapiens (Human) |
| (20S)-24-ene-3 $\beta$ ,20-diol-3-acetate | P0DP24 | CALM2_HUMAN | Homo sapiens (Human) |

|                                           |        |             |                      |
|-------------------------------------------|--------|-------------|----------------------|
| (20S)-24-ene-3 $\beta$ ,20-diol-3-acetate | P0DP25 | CALM3_HUMAN | Homo sapiens (Human) |
| (20S)-24-ene-3 $\beta$ ,20-diol-3-acetate | P08581 | MET_HUMAN   | Homo sapiens (Human) |
| (20S)-24-ene-3 $\beta$ ,20-diol-3-acetate | P08263 | GSTA1_HUMAN | Homo sapiens (Human) |
| (20S)-24-ene-3 $\beta$ ,20-diol-3-acetate | O15540 | FABP7_HUMAN | Homo sapiens (Human) |
| (20S)-24-ene-3 $\beta$ ,20-diol-3-acetate | P68400 | CSK21_HUMAN | Homo sapiens (Human) |
| (20S)-24-ene-3 $\beta$ ,20-diol-3-acetate | Q13133 | NR1H3_HUMAN | Homo sapiens (Human) |
| (20S)-24-ene-3 $\beta$ ,20-diol-3-acetate | Q9BY41 | HDAC8_HUMAN | Homo sapiens (Human) |
| (20S)-24-ene-3 $\beta$ ,20-diol-3-acetate | O00204 | ST2B1_HUMAN | Homo sapiens (Human) |
| (20S)-24-ene-3 $\beta$ ,20-diol-3-acetate | O60760 | HPGDS_HUMAN | Homo sapiens (Human) |
| (20S)-24-ene-3 $\beta$ ,20-diol-3-acetate | O43617 | TPPC3_HUMAN | Homo sapiens (Human) |
| (20S)-24-ene-3 $\beta$ ,20-diol-3-acetate | P00746 | CFAD_HUMAN  | Homo sapiens (Human) |
| (20S)-24-ene-3 $\beta$ ,20-diol-3-acetate | P07858 | CATB_HUMAN  | Homo sapiens (Human) |
| (20S)-24-ene-3 $\beta$ ,20-diol-3-acetate | P52333 | JAK3_HUMAN  | Homo sapiens (Human) |
| (20S)-24-ene-3 $\beta$ ,20-diol-3-acetate | Q04828 | AK1C1_HUMAN | Homo sapiens (Human) |
| (20S)-24-ene-3 $\beta$ ,20-diol-3-acetate | P34913 | HYES_HUMAN  | Homo sapiens (Human) |
| Linarin                                   | P45452 | MMP13_HUMAN | Homo sapiens (Human) |
| Linarin                                   | P17342 | ANPRC_HUMAN | Homo sapiens (Human) |
| Linarin                                   | P04062 | GLCM_HUMAN  | Homo sapiens (Human) |
| Linarin                                   | Q9BZR6 | RTN4R_HUMAN | Homo sapiens (Human) |
| Linarin                                   | P56817 | BACE1_HUMAN | Homo sapiens (Human) |
| Linarin                                   | Q12884 | SEPR_HUMAN  | Homo sapiens (Human) |
| Linarin                                   | P09211 | GSTP1_HUMAN | Homo sapiens (Human) |
| Linarin                                   | P11309 | PIM1_HUMAN  | Homo sapiens (Human) |
| Linarin                                   | P11142 | HSP7C_HUMAN | Homo sapiens (Human) |
| Linarin                                   | Q9NP99 | TREM1_HUMAN | Homo sapiens (Human) |
| Linarin                                   | Q92731 | ESR2_HUMAN  | Homo sapiens (Human) |
| Linarin                                   | P00491 | PNPH_HUMAN  | Homo sapiens (Human) |
| Linarin                                   | P00533 | EGFR_HUMAN  | Homo sapiens (Human) |
| Linarin                                   | O43570 | CAH12_HUMAN | Homo sapiens (Human) |
| Linarin                                   | O14965 | AURKA_HUMAN | Homo sapiens (Human) |
| Linarin                                   | P53582 | MAP11_HUMAN | Homo sapiens (Human) |
| Linarin                                   | O60911 | CATL2_HUMAN | Homo sapiens (Human) |
| Linarin                                   | P24071 | FCAR_HUMAN  | Homo sapiens (Human) |
| Linarin                                   | P25774 | CATS_HUMAN  | Homo sapiens (Human) |
| Linarin                                   | P62937 | PPIA_HUMAN  | Homo sapiens (Human) |
| Linarin                                   | P03372 | ESR1_HUMAN  | Homo sapiens (Human) |
| Linarin                                   | P00915 | CAH1_HUMAN  | Homo sapiens (Human) |
| Linarin                                   | P07900 | HS90A_HUMAN | Homo sapiens (Human) |
| Linarin                                   | Q16539 | MK14_HUMAN  | Homo sapiens (Human) |
| Linarin                                   | P02766 | TTHY_HUMAN  | Homo sapiens (Human) |
| Linarin                                   | P06276 | CHLE_HUMAN  | Homo sapiens (Human) |
| Linarin                                   | Q07343 | PDE4B_HUMAN | Homo sapiens (Human) |
| Linarin                                   | P00918 | CAH2_HUMAN  | Homo sapiens (Human) |
| Linarin                                   | P37173 | TGFR2_HUMAN | Homo sapiens (Human) |
| Linarin                                   | P20248 | CCNA2_HUMAN | Homo sapiens (Human) |
| Linarin                                   | P23946 | CMA1_HUMAN  | Homo sapiens (Human) |
| Linarin                                   | Q9BW91 | NUDT9_HUMAN | Homo sapiens (Human) |
| Linarin                                   | P26196 | DDX6_HUMAN  | Homo sapiens (Human) |
| Linarin                                   | P55055 | NR1H2_HUMAN | Homo sapiens (Human) |
| Linarin                                   | P53779 | MK10_HUMAN  | Homo sapiens (Human) |
| Linarin                                   | O14757 | CHK1_HUMAN  | Homo sapiens (Human) |
| Linarin                                   | P08631 | HCK_HUMAN   | Homo sapiens (Human) |
| Linarin                                   | P00734 | THRB_HUMAN  | Homo sapiens (Human) |
| Linarin                                   | P23141 | EST1_HUMAN  | Homo sapiens (Human) |
| Linarin                                   | Q13126 | MTAP_HUMAN  | Homo sapiens (Human) |
| Linarin                                   | P62942 | FKB1A_HUMAN | Homo sapiens (Human) |
| Linarin                                   | P42330 | AK1C3_HUMAN | Homo sapiens (Human) |
| Linarin                                   | Q8NBQ5 | DHB11_HUMAN | Homo sapiens (Human) |

|         |        |             |                      |
|---------|--------|-------------|----------------------|
| Linarin | P10275 | ANDR_HUMAN  | Homo sapiens (Human) |
| Linarin | P24941 | CDK2_HUMAN  | Homo sapiens (Human) |
| Linarin | P00749 | UROK_HUMAN  | Homo sapiens (Human) |
| Linarin | Q00534 | CDK6_HUMAN  | Homo sapiens (Human) |
| Linarin | P11511 | CP19A_HUMAN | Homo sapiens (Human) |
| Linarin | P04745 | AMY1_HUMAN  | Homo sapiens (Human) |
| Linarin | P02768 | ALBU_HUMAN  | Homo sapiens (Human) |
| Linarin | P42574 | CASP3_HUMAN | Homo sapiens (Human) |
| Linarin | P02652 | APOA2_HUMAN | Homo sapiens (Human) |
| Linarin | P08842 | STS_HUMAN   | Homo sapiens (Human) |
| Linarin | Q13231 | CHIT1_HUMAN | Homo sapiens (Human) |
| Linarin | P29218 | IMPA1_HUMAN | Homo sapiens (Human) |
| Linarin | P03950 | ANGI_HUMAN  | Homo sapiens (Human) |
| Linarin | P07339 | CATD_HUMAN  | Homo sapiens (Human) |
| Linarin | P45983 | MK08_HUMAN  | Homo sapiens (Human) |
| Linarin | P00751 | CFAB_HUMAN  | Homo sapiens (Human) |
| Linarin | P08254 | MMP3_HUMAN  | Homo sapiens (Human) |
| Linarin | P06401 | PRGR_HUMAN  | Homo sapiens (Human) |
| Linarin | P54760 | EPHB4_HUMAN | Homo sapiens (Human) |
| Linarin | Q16769 | QPCT_HUMAN  | Homo sapiens (Human) |
| Linarin | P25311 | ZA2G_HUMAN  | Homo sapiens (Human) |
| Linarin | O76074 | PDE5A_HUMAN | Homo sapiens (Human) |
| Linarin | P07858 | CATB_HUMAN  | Homo sapiens (Human) |
| Linarin | P49841 | GSK3B_HUMAN | Homo sapiens (Human) |
| Linarin | Q05315 | LEG10_HUMAN | Homo sapiens (Human) |
| Linarin | P15121 | ALDR_HUMAN  | Homo sapiens (Human) |
| Linarin | Q13370 | PDE3B_HUMAN | Homo sapiens (Human) |
| Linarin | P53355 | DAPK1_HUMAN | Homo sapiens (Human) |
| Linarin | P27338 | AOFB_HUMAN  | Homo sapiens (Human) |
| Linarin | P04278 | SHBG_HUMAN  | Homo sapiens (Human) |
| Linarin | P19367 | HXK1_HUMAN  | Homo sapiens (Human) |
| Linarin | P48449 | ERG7_HUMAN  | Homo sapiens (Human) |
| Linarin | P12931 | SRC_HUMAN   | Homo sapiens (Human) |
| Linarin | P18075 | BMP7_HUMAN  | Homo sapiens (Human) |
| Linarin | P63316 | TNNC1_HUMAN | Homo sapiens (Human) |
| Linarin | O15382 | BCAT2_HUMAN | Homo sapiens (Human) |
| Linarin | P02743 | SAMP_HUMAN  | Homo sapiens (Human) |
| Linarin | P29474 | NOS3_HUMAN  | Homo sapiens (Human) |
| Linarin | P47929 | LEG7_HUMAN  | Homo sapiens (Human) |
| Linarin | P16083 | NQO2_HUMAN  | Homo sapiens (Human) |
| Linarin | P00390 | GSHR_HUMAN  | Homo sapiens (Human) |
| Linarin | P14174 | MIF_HUMAN   | Homo sapiens (Human) |
| Linarin | P36897 | TGFR1_HUMAN | Homo sapiens (Human) |
| Linarin | P19971 | TYPH_HUMAN  | Homo sapiens (Human) |
| Linarin | P78368 | KC1G2_HUMAN | Homo sapiens (Human) |
| Linarin | P14061 | DHB1_HUMAN  | Homo sapiens (Human) |
| Linarin | P78536 | ADA17_HUMAN | Homo sapiens (Human) |
| Linarin | P04179 | SODM_HUMAN  | Homo sapiens (Human) |
| Linarin | P43155 | CACP_HUMAN  | Homo sapiens (Human) |
| Linarin | P00374 | DYR_HUMAN   | Homo sapiens (Human) |
| Linarin | Q08499 | PDE4D_HUMAN | Homo sapiens (Human) |
| Linarin | P01709 | LV208_HUMAN | Homo sapiens (Human) |
| Linarin | P00439 | PH4H_HUMAN  | Homo sapiens (Human) |
| Linarin | P35968 | VGFR2_HUMAN | Homo sapiens (Human) |
| Linarin | P62166 | NCS1_HUMAN  | Homo sapiens (Human) |
| Linarin | P06737 | PYGL_HUMAN  | Homo sapiens (Human) |
| Linarin | P27487 | DPP4_HUMAN  | Homo sapiens (Human) |
| Linarin | P22894 | MMP8_HUMAN  | Homo sapiens (Human) |

|         |        |             |                      |
|---------|--------|-------------|----------------------|
| Linarin | P00736 | C1R_HUMAN   | Homo sapiens (Human) |
| Linarin | P62508 | ERR3_HUMAN  | Homo sapiens (Human) |
| Linarin | P08758 | ANXA5_HUMAN | Homo sapiens (Human) |
| Linarin | P23526 | SAHH_HUMAN  | Homo sapiens (Human) |
| Linarin | P37231 | PPARG_HUMAN | Homo sapiens (Human) |
| Linarin | P04746 | AMYP_HUMAN  | Homo sapiens (Human) |
| Linarin | P17707 | DCAM_HUMAN  | Homo sapiens (Human) |
| Linarin | Q03181 | PPARD_HUMAN | Homo sapiens (Human) |
| Linarin | P15056 | BRAF_HUMAN  | Homo sapiens (Human) |
| Linarin | P55210 | CASP7_HUMAN | Homo sapiens (Human) |
| Linarin | Q00796 | DHSO_HUMAN  | Homo sapiens (Human) |
| Linarin | P35558 | PCKGC_HUMAN | Homo sapiens (Human) |
| Linarin | P00746 | CFAD_HUMAN  | Homo sapiens (Human) |
| Linarin | P49354 | FNTA_HUMAN  | Homo sapiens (Human) |
| Linarin | P52732 | KIF11_HUMAN | Homo sapiens (Human) |
| Linarin | Q9NVS9 | PNPO_HUMAN  | Homo sapiens (Human) |
| Linarin | P00742 | FA10_HUMAN  | Homo sapiens (Human) |
| Linarin | P53350 | PLK1_HUMAN  | Homo sapiens (Human) |
| Linarin | O15496 | PA2GX_HUMAN | Homo sapiens (Human) |
| Linarin | P16152 | CBR1_HUMAN  | Homo sapiens (Human) |
| Linarin | O15530 | PDPK1_HUMAN | Homo sapiens (Human) |
| Linarin | P11362 | FGFR1_HUMAN | Homo sapiens (Human) |
| Linarin | Q96T66 | NMNA3_HUMAN | Homo sapiens (Human) |
| Linarin | Q02127 | PYRD_HUMAN  | Homo sapiens (Human) |
| Linarin | P32320 | CDD_HUMAN   | Homo sapiens (Human) |
| Linarin | P43235 | CATK_HUMAN  | Homo sapiens (Human) |
| Linarin | Q06520 | ST2A1_HUMAN | Homo sapiens (Human) |
| Linarin | Q15382 | RHEB_HUMAN  | Homo sapiens (Human) |
| Linarin | P05162 | LEG2_HUMAN  | Homo sapiens (Human) |
| Linarin | P28482 | MK01_HUMAN  | Homo sapiens (Human) |
| Linarin | P00797 | RENI_HUMAN  | Homo sapiens (Human) |
| Linarin | P15559 | NQO1_HUMAN  | Homo sapiens (Human) |
| Linarin | P04818 | TYSY_HUMAN  | Homo sapiens (Human) |
| Linarin | Q07912 | ACK1_HUMAN  | Homo sapiens (Human) |
| Linarin | P08069 | IGF1R_HUMAN | Homo sapiens (Human) |
| Linarin | P15153 | RAC2_HUMAN  | Homo sapiens (Human) |
| Linarin | P09960 | LKHA4_HUMAN | Homo sapiens (Human) |
| Linarin | P00325 | ADH1B_HUMAN | Homo sapiens (Human) |
| Linarin | Q99933 | BAG1_HUMAN  | Homo sapiens (Human) |
| Linarin | P49789 | FHIT_HUMAN  | Homo sapiens (Human) |
| Linarin | Q16836 | HCDH_HUMAN  | Homo sapiens (Human) |
| Linarin | Q16828 | DUS6_HUMAN  | Homo sapiens (Human) |
| Linarin | P18031 | PTN1_HUMAN  | Homo sapiens (Human) |
| Linarin | P05091 | ALDH2_HUMAN | Homo sapiens (Human) |
| Linarin | P31749 | AKT1_HUMAN  | Homo sapiens (Human) |
| Linarin | P60174 | TPIS_HUMAN  | Homo sapiens (Human) |
| Linarin | P02774 | VTDB_HUMAN  | Homo sapiens (Human) |
| Linarin | P62491 | RB11A_HUMAN | Homo sapiens (Human) |
| Linarin | P84077 | ARF1_HUMAN  | Homo sapiens (Human) |
| Linarin | P08235 | MCR_HUMAN   | Homo sapiens (Human) |
| Linarin | Q04760 | LGUL_HUMAN  | Homo sapiens (Human) |
| Linarin | Q96AZ6 | ISG20_HUMAN | Homo sapiens (Human) |
| Linarin | P68400 | CSK21_HUMAN | Homo sapiens (Human) |
| Linarin | P28845 | DHI1_HUMAN  | Homo sapiens (Human) |
| Linarin | P27707 | DCK_HUMAN   | Homo sapiens (Human) |
| Linarin | Q9P2W7 | B3GA1_HUMAN | Homo sapiens (Human) |
| Linarin | P08246 | ELNE_HUMAN  | Homo sapiens (Human) |
| Linarin | P01009 | A1AT_HUMAN  | Homo sapiens (Human) |

|          |        |             |                      |
|----------|--------|-------------|----------------------|
| Linarin  | Q10588 | BST1_HUMAN  | Homo sapiens (Human) |
| Linarin  | P08581 | MET_HUMAN   | Homo sapiens (Human) |
| Linarin  | Q04828 | AK1C1_HUMAN | Homo sapiens (Human) |
| Linarin  | P07195 | LDHB_HUMAN  | Homo sapiens (Human) |
| Linarin  | P35228 | NOS2_HUMAN  | Homo sapiens (Human) |
| Linarin  | P30043 | BLVRB_HUMAN | Homo sapiens (Human) |
| Linarin  | P15090 | FABP4_HUMAN | Homo sapiens (Human) |
| Linarin  | P06239 | LCK_HUMAN   | Homo sapiens (Human) |
| Linarin  | P17931 | LEG3_HUMAN  | Homo sapiens (Human) |
| Linarin  | P15309 | PPAP_HUMAN  | Homo sapiens (Human) |
| Linarin  | P49137 | MAPK2_HUMAN | Homo sapiens (Human) |
| acacetin | Q16678 | CP1B1_HUMAN | Homo sapiens (Human) |
| acacetin | P08631 | HCK_HUMAN   | Homo sapiens (Human) |
| acacetin | P00918 | CAH2_HUMAN  | Homo sapiens (Human) |
| acacetin | P03372 | ESR1_HUMAN  | Homo sapiens (Human) |
| acacetin | P00915 | CAH1_HUMAN  | Homo sapiens (Human) |
| acacetin | P06276 | CHLE_HUMAN  | Homo sapiens (Human) |
| acacetin | P24941 | CDK2_HUMAN  | Homo sapiens (Human) |
| acacetin | P11309 | PIM1_HUMAN  | Homo sapiens (Human) |
| acacetin | P00734 | THRB_HUMAN  | Homo sapiens (Human) |
| acacetin | P10275 | ANDR_HUMAN  | Homo sapiens (Human) |
| acacetin | P11511 | CP19A_HUMAN | Homo sapiens (Human) |
| acacetin | P00390 | GSHR_HUMAN  | Homo sapiens (Human) |
| acacetin | P02768 | ALBU_HUMAN  | Homo sapiens (Human) |
| acacetin | P02652 | APOA2_HUMAN | Homo sapiens (Human) |
| acacetin | Q00534 | CDK6_HUMAN  | Homo sapiens (Human) |
| acacetin | P08842 | STS_HUMAN   | Homo sapiens (Human) |
| acacetin | P02766 | TTHY_HUMAN  | Homo sapiens (Human) |
| acacetin | P00751 | CFAB_HUMAN  | Homo sapiens (Human) |
| acacetin | P53779 | MK10_HUMAN  | Homo sapiens (Human) |
| acacetin | P03950 | ANGI_HUMAN  | Homo sapiens (Human) |
| acacetin | P29474 | NOS3_HUMAN  | Homo sapiens (Human) |
| acacetin | O15382 | BCAT2_HUMAN | Homo sapiens (Human) |
| acacetin | P54760 | EPHB4_HUMAN | Homo sapiens (Human) |
| acacetin | Q92731 | ESR2_HUMAN  | Homo sapiens (Human) |
| acacetin | P14061 | DHB1_HUMAN  | Homo sapiens (Human) |
| acacetin | P78536 | ADA17_HUMAN | Homo sapiens (Human) |
| acacetin | P04278 | SHBG_HUMAN  | Homo sapiens (Human) |
| acacetin | P27338 | AOFB_HUMAN  | Homo sapiens (Human) |
| acacetin | P11142 | HSP7C_HUMAN | Homo sapiens (Human) |
| acacetin | P35968 | VGFR2_HUMAN | Homo sapiens (Human) |
| acacetin | Q16539 | MK14_HUMAN  | Homo sapiens (Human) |
| acacetin | P15056 | BRAF_HUMAN  | Homo sapiens (Human) |
| acacetin | P06401 | PRGR_HUMAN  | Homo sapiens (Human) |
| acacetin | P14174 | MIF_HUMAN   | Homo sapiens (Human) |
| acacetin | P15559 | NQO1_HUMAN  | Homo sapiens (Human) |
| acacetin | P45983 | MK08_HUMAN  | Homo sapiens (Human) |
| acacetin | O14965 | AURKA_HUMAN | Homo sapiens (Human) |
| acacetin | P15121 | ALDR_HUMAN  | Homo sapiens (Human) |
| acacetin | Q16828 | DUS6_HUMAN  | Homo sapiens (Human) |
| acacetin | P06737 | PYGL_HUMAN  | Homo sapiens (Human) |
| acacetin | P62508 | ERR3_HUMAN  | Homo sapiens (Human) |
| acacetin | O14757 | CHK1_HUMAN  | Homo sapiens (Human) |
| acacetin | P45452 | MMP13_HUMAN | Homo sapiens (Human) |
| acacetin | Q06520 | ST2A1_HUMAN | Homo sapiens (Human) |
| acacetin | P56817 | BACE1_HUMAN | Homo sapiens (Human) |
| acacetin | P23141 | EST1_HUMAN  | Homo sapiens (Human) |
| acacetin | P00491 | PNPH_HUMAN  | Homo sapiens (Human) |

|          |        |             |                      |
|----------|--------|-------------|----------------------|
| acacetin | O15530 | PDPK1_HUMAN | Homo sapiens (Human) |
| acacetin | Q08499 | PDE4D_HUMAN | Homo sapiens (Human) |
| acacetin | P00374 | DYR_HUMAN   | Homo sapiens (Human) |
| acacetin | P02774 | VTDB_HUMAN  | Homo sapiens (Human) |
| acacetin | P07900 | HS90A_HUMAN | Homo sapiens (Human) |
| acacetin | P11766 | ADHX_HUMAN  | Homo sapiens (Human) |
| acacetin | P09960 | LKHA4_HUMAN | Homo sapiens (Human) |
| acacetin | P20248 | CCNA2_HUMAN | Homo sapiens (Human) |
| butin    | P11511 | CP19A_HUMAN | Homo sapiens (Human) |
| butin    | P43166 | CAH7_HUMAN  | Homo sapiens (Human) |
| butin    | O43570 | CAH12_HUMAN | Homo sapiens (Human) |
| butin    | P22748 | CAH4_HUMAN  | Homo sapiens (Human) |
| butin    | Q16678 | CP1B1_HUMAN | Homo sapiens (Human) |
| butin    | P08631 | HCK_HUMAN   | Homo sapiens (Human) |
| butin    | P00918 | CAH2_HUMAN  | Homo sapiens (Human) |
| butin    | P03372 | ESR1_HUMAN  | Homo sapiens (Human) |
| butin    | P00915 | CAH1_HUMAN  | Homo sapiens (Human) |
| butin    | P06276 | CHLE_HUMAN  | Homo sapiens (Human) |
| butin    | P24941 | CDK2_HUMAN  | Homo sapiens (Human) |
| butin    | P11309 | PIM1_HUMAN  | Homo sapiens (Human) |
| butin    | P00734 | THRB_HUMAN  | Homo sapiens (Human) |
| butin    | P10275 | ANDR_HUMAN  | Homo sapiens (Human) |
| butin    | P11511 | CP19A_HUMAN | Homo sapiens (Human) |
| butin    | P00390 | GSHR_HUMAN  | Homo sapiens (Human) |
| butin    | P02768 | ALBU_HUMAN  | Homo sapiens (Human) |
| butin    | P02652 | APOA2_HUMAN | Homo sapiens (Human) |
| butin    | Q00534 | CDK6_HUMAN  | Homo sapiens (Human) |
| butin    | P08842 | STS_HUMAN   | Homo sapiens (Human) |
| butin    | P02766 | TTHY_HUMAN  | Homo sapiens (Human) |
| butin    | P00751 | CFAB_HUMAN  | Homo sapiens (Human) |
| butin    | P53779 | MK10_HUMAN  | Homo sapiens (Human) |
| butin    | P03950 | ANGI_HUMAN  | Homo sapiens (Human) |
| butin    | P29474 | NOS3_HUMAN  | Homo sapiens (Human) |
| butin    | O15382 | BCAT2_HUMAN | Homo sapiens (Human) |
| butin    | P54760 | EPHB4_HUMAN | Homo sapiens (Human) |
| butin    | Q92731 | ESR2_HUMAN  | Homo sapiens (Human) |
| butin    | P14061 | DHB1_HUMAN  | Homo sapiens (Human) |
| butin    | P78536 | ADA17_HUMAN | Homo sapiens (Human) |
| butin    | P04278 | SHBG_HUMAN  | Homo sapiens (Human) |
| butin    | P27338 | AOFB_HUMAN  | Homo sapiens (Human) |
| butin    | P11142 | HSP7C_HUMAN | Homo sapiens (Human) |
| butin    | P35968 | VGFR2_HUMAN | Homo sapiens (Human) |
| butin    | Q16539 | MK14_HUMAN  | Homo sapiens (Human) |
| butin    | P15056 | BRAF_HUMAN  | Homo sapiens (Human) |
| butin    | P06401 | PRGR_HUMAN  | Homo sapiens (Human) |
| butin    | P14174 | MIF_HUMAN   | Homo sapiens (Human) |
| butin    | P15559 | NQO1_HUMAN  | Homo sapiens (Human) |
| butin    | P45983 | MK08_HUMAN  | Homo sapiens (Human) |
| butin    | O14965 | AURKA_HUMAN | Homo sapiens (Human) |
| butin    | P15121 | ALDR_HUMAN  | Homo sapiens (Human) |
| butin    | Q16828 | DUS6_HUMAN  | Homo sapiens (Human) |
| butin    | P06737 | PYGL_HUMAN  | Homo sapiens (Human) |
| butin    | P62508 | ERR3_HUMAN  | Homo sapiens (Human) |
| butin    | O14757 | CHK1_HUMAN  | Homo sapiens (Human) |
| butin    | P45452 | MMP13_HUMAN | Homo sapiens (Human) |
| butin    | Q06520 | ST2A1_HUMAN | Homo sapiens (Human) |
| butin    | P56817 | BACE1_HUMAN | Homo sapiens (Human) |
| butin    | P23141 | EST1_HUMAN  | Homo sapiens (Human) |



|            |        |             |                      |
|------------|--------|-------------|----------------------|
| butin      | P00491 | PNPH_HUMAN  | Homo sapiens (Human) |
| butin      | O15530 | PDPK1_HUMAN | Homo sapiens (Human) |
| butin      | Q08499 | PDE4D_HUMAN | Homo sapiens (Human) |
| butin      | P00374 | DYR_HUMAN   | Homo sapiens (Human) |
| butin      | P02774 | VTDB_HUMAN  | Homo sapiens (Human) |
| butin      | P07900 | HS90A_HUMAN | Homo sapiens (Human) |
| butin      | P11766 | ADHX_HUMAN  | Homo sapiens (Human) |
| butin      | P09960 | LKHA4_HUMAN | Homo sapiens (Human) |
| butin      | P20248 | CCNA2_HUMAN | Homo sapiens (Human) |
| Pratensein | P00491 | PNPH_HUMAN  | Homo sapiens (Human) |
| Pratensein | P03372 | ESR1_HUMAN  | Homo sapiens (Human) |
| Pratensein | P00918 | CAH2_HUMAN  | Homo sapiens (Human) |
| Pratensein | Q92731 | ESR2_HUMAN  | Homo sapiens (Human) |
| Pratensein | P08254 | MMP3_HUMAN  | Homo sapiens (Human) |
| Pratensein | P11309 | PIM1_HUMAN  | Homo sapiens (Human) |
| Pratensein | P00915 | CAH1_HUMAN  | Homo sapiens (Human) |
| Pratensein | P35968 | VGFR2_HUMAN | Homo sapiens (Human) |
| Pratensein | P53779 | MK10_HUMAN  | Homo sapiens (Human) |
| Pratensein | Q12884 | SEPR_HUMAN  | Homo sapiens (Human) |
| Pratensein | P06276 | CHLE_HUMAN  | Homo sapiens (Human) |
| Pratensein | Q16539 | MK14_HUMAN  | Homo sapiens (Human) |
| Pratensein | P23141 | EST1_HUMAN  | Homo sapiens (Human) |
| Pratensein | P56817 | BACE1_HUMAN | Homo sapiens (Human) |
| Pratensein | O14757 | CHK1_HUMAN  | Homo sapiens (Human) |
| Pratensein | P10275 | ANDR_HUMAN  | Homo sapiens (Human) |
| Pratensein | P00751 | CFAB_HUMAN  | Homo sapiens (Human) |
| Pratensein | P45983 | MK08_HUMAN  | Homo sapiens (Human) |
| Pratensein | P20248 | CCNA2_HUMAN | Homo sapiens (Human) |
| Pratensein | P24941 | CDK2_HUMAN  | Homo sapiens (Human) |
| Pratensein | P78536 | ADA17_HUMAN | Homo sapiens (Human) |
| Pratensein | P02768 | ALBU_HUMAN  | Homo sapiens (Human) |
| Pratensein | P11142 | HSP7C_HUMAN | Homo sapiens (Human) |
| Pratensein | P08842 | STS_HUMAN   | Homo sapiens (Human) |
| Pratensein | P02652 | APOA2_HUMAN | Homo sapiens (Human) |
| Pratensein | O14965 | AURKA_HUMAN | Homo sapiens (Human) |
| Pratensein | P04062 | GLCM_HUMAN  | Homo sapiens (Human) |
| Pratensein | P07339 | CATD_HUMAN  | Homo sapiens (Human) |
| Pratensein | P06401 | PRGR_HUMAN  | Homo sapiens (Human) |
| Pratensein | P11362 | FGFR1_HUMAN | Homo sapiens (Human) |
| Pratensein | P00439 | PH4H_HUMAN  | Homo sapiens (Human) |
| Pratensein | P54760 | EPHB4_HUMAN | Homo sapiens (Human) |
| Pratensein | P45452 | MMP13_HUMAN | Homo sapiens (Human) |
| Pratensein | P03950 | ANGI_HUMAN  | Homo sapiens (Human) |
| Pratensein | O15382 | BCAT2_HUMAN | Homo sapiens (Human) |
| Pratensein | Q13126 | MTAP_HUMAN  | Homo sapiens (Human) |
| Pratensein | P27338 | AOFB_HUMAN  | Homo sapiens (Human) |
| Pratensein | P11511 | CP19A_HUMAN | Homo sapiens (Human) |
| Pratensein | Q00534 | CDK6_HUMAN  | Homo sapiens (Human) |
| Pratensein | P04278 | SHBG_HUMAN  | Homo sapiens (Human) |
| Pratensein | Q06520 | ST2A1_HUMAN | Homo sapiens (Human) |
| Pratensein | P00734 | THRB_HUMAN  | Homo sapiens (Human) |
| Pratensein | P00533 | EGFR_HUMAN  | Homo sapiens (Human) |
| Pratensein | P14174 | MIF_HUMAN   | Homo sapiens (Human) |
| Pratensein | P22894 | MMP8_HUMAN  | Homo sapiens (Human) |
| Pratensein | P09960 | LKHA4_HUMAN | Homo sapiens (Human) |
| Pratensein | P15559 | NQO1_HUMAN  | Homo sapiens (Human) |
| Pratensein | Q08499 | PDE4D_HUMAN | Homo sapiens (Human) |
| Pratensein | P14061 | DHB1_HUMAN  | Homo sapiens (Human) |

|                       |        |             |                      |
|-----------------------|--------|-------------|----------------------|
| Pratensein            | P06737 | PYGL_HUMAN  | Homo sapiens (Human) |
| Pratensein            | Q16828 | DUS6_HUMAN  | Homo sapiens (Human) |
| Pratensein            | P02766 | TTHY_HUMAN  | Homo sapiens (Human) |
| Pratensein            | P18075 | BMP7_HUMAN  | Homo sapiens (Human) |
| Pratensein            | P15121 | ALDR_HUMAN  | Homo sapiens (Human) |
| Pratensein            | P78368 | KC1G2_HUMAN | Homo sapiens (Human) |
| Pratensein            | P00374 | DYR_HUMAN   | Homo sapiens (Human) |
| Pratensein            | Q07343 | PDE4B_HUMAN | Homo sapiens (Human) |
| Pratensein            | P00390 | GSHR_HUMAN  | Homo sapiens (Human) |
| Pratensein            | P27487 | DPP4_HUMAN  | Homo sapiens (Human) |
| Pratensein            | P50579 | MAP2_HUMAN  | Homo sapiens (Human) |
| Pratensein            | P62508 | ERR3_HUMAN  | Homo sapiens (Human) |
| Pratensein            | P28845 | DHI1_HUMAN  | Homo sapiens (Human) |
| Pratensein            | P07900 | HS90A_HUMAN | Homo sapiens (Human) |
| Pratensein            | Q03181 | PPARD_HUMAN | Homo sapiens (Human) |
| Pratensein            | P52732 | KIF11_HUMAN | Homo sapiens (Human) |
| Pratensein            | P53350 | PLK1_HUMAN  | Homo sapiens (Human) |
| Pratensein            | Q13370 | PDE3B_HUMAN | Homo sapiens (Human) |
| Pratensein            | P35558 | PCKGC_HUMAN | Homo sapiens (Human) |
| Pratensein            | P31749 | AKT1_HUMAN  | Homo sapiens (Human) |
| Pratensein            | O15530 | PDPK1_HUMAN | Homo sapiens (Human) |
| Pratensein            | P00742 | FA10_HUMAN  | Homo sapiens (Human) |
| Pratensein            | P29474 | NOS3_HUMAN  | Homo sapiens (Human) |
| Pratensein            | P12931 | SRC_HUMAN   | Homo sapiens (Human) |
| Pratensein            | P07858 | CATB_HUMAN  | Homo sapiens (Human) |
| Pratensein            | Q02127 | PYRD_HUMAN  | Homo sapiens (Human) |
| Pratensein            | P04745 | AMY1_HUMAN  | Homo sapiens (Human) |
| Pratensein            | P16152 | CBR1_HUMAN  | Homo sapiens (Human) |
| Pratensein            | Q07912 | ACK1_HUMAN  | Homo sapiens (Human) |
| Pratensein            | P02774 | VTDB_HUMAN  | Homo sapiens (Human) |
| Pratensein            | P04818 | TYSY_HUMAN  | Homo sapiens (Human) |
| Pratensein            | Q15382 | RHEB_HUMAN  | Homo sapiens (Human) |
| Pratensein            | P49354 | FNTA_HUMAN  | Homo sapiens (Human) |
| Pratensein            | P16442 | BGAT_HUMAN  | Homo sapiens (Human) |
| demethylwedelolactone | P20248 | CCNA2_HUMAN | Homo sapiens (Human) |
| demethylwedelolactone | P10275 | ANDR_HUMAN  | Homo sapiens (Human) |
| demethylwedelolactone | P24941 | CDK2_HUMAN  | Homo sapiens (Human) |
| demethylwedelolactone | P03372 | ESR1_HUMAN  | Homo sapiens (Human) |
| demethylwedelolactone | P00734 | THRB_HUMAN  | Homo sapiens (Human) |
| demethylwedelolactone | P06276 | CHLE_HUMAN  | Homo sapiens (Human) |
| demethylwedelolactone | P53779 | MK10_HUMAN  | Homo sapiens (Human) |
| demethylwedelolactone | P00918 | CAH2_HUMAN  | Homo sapiens (Human) |
| demethylwedelolactone | Q16740 | CLPP_HUMAN  | Homo sapiens (Human) |
| demethylwedelolactone | Q12884 | SEPR_HUMAN  | Homo sapiens (Human) |
| demethylwedelolactone | P45983 | MK08_HUMAN  | Homo sapiens (Human) |
| demethylwedelolactone | P48736 | PK3CG_HUMAN | Homo sapiens (Human) |
| demethylwedelolactone | P00915 | CAH1_HUMAN  | Homo sapiens (Human) |
| demethylwedelolactone | P11511 | CP19A_HUMAN | Homo sapiens (Human) |
| demethylwedelolactone | P62937 | PPIA_HUMAN  | Homo sapiens (Human) |
| demethylwedelolactone | P00491 | PNPH_HUMAN  | Homo sapiens (Human) |
| demethylwedelolactone | Q16539 | MK14_HUMAN  | Homo sapiens (Human) |
| demethylwedelolactone | P12643 | BMP2_HUMAN  | Homo sapiens (Human) |
| demethylwedelolactone | P00533 | EGFR_HUMAN  | Homo sapiens (Human) |
| demethylwedelolactone | P02652 | APOA2_HUMAN | Homo sapiens (Human) |
| demethylwedelolactone | P23141 | EST1_HUMAN  | Homo sapiens (Human) |
| demethylwedelolactone | P00751 | CFAB_HUMAN  | Homo sapiens (Human) |
| demethylwedelolactone | Q08499 | PDE4D_HUMAN | Homo sapiens (Human) |
| demethylwedelolactone | P08842 | STS_HUMAN   | Homo sapiens (Human) |

|                       |        |             |                      |
|-----------------------|--------|-------------|----------------------|
| demethylwedelolactone | P11309 | PIM1_HUMAN  | Homo sapiens (Human) |
| demethylwedelolactone | Q8NBQ5 | DHB11_HUMAN | Homo sapiens (Human) |
| demethylwedelolactone | P02768 | ALBU_HUMAN  | Homo sapiens (Human) |
| demethylwedelolactone | O14965 | AURKA_HUMAN | Homo sapiens (Human) |
| demethylwedelolactone | Q07343 | PDE4B_HUMAN | Homo sapiens (Human) |
| demethylwedelolactone | O43570 | CAH12_HUMAN | Homo sapiens (Human) |
| demethylwedelolactone | P08254 | MMP3_HUMAN  | Homo sapiens (Human) |
| demethylwedelolactone | P07900 | HS90A_HUMAN | Homo sapiens (Human) |
| demethylwedelolactone | P35221 | CTNA1_HUMAN | Homo sapiens (Human) |
| demethylwedelolactone | P56817 | BACE1_HUMAN | Homo sapiens (Human) |
| demethylwedelolactone | P54760 | EPHB4_HUMAN | Homo sapiens (Human) |
| demethylwedelolactone | P52732 | KIF11_HUMAN | Homo sapiens (Human) |
| demethylwedelolactone | P00390 | GSHR_HUMAN  | Homo sapiens (Human) |
| demethylwedelolactone | P00439 | PH4H_HUMAN  | Homo sapiens (Human) |
| demethylwedelolactone | P62508 | ERR3_HUMAN  | Homo sapiens (Human) |
| demethylwedelolactone | P35968 | VGFR2_HUMAN | Homo sapiens (Human) |
| demethylwedelolactone | P14061 | DHB1_HUMAN  | Homo sapiens (Human) |
| demethylwedelolactone | P53041 | PPP5_HUMAN  | Homo sapiens (Human) |
| demethylwedelolactone | P11766 | ADHX_HUMAN  | Homo sapiens (Human) |
| demethylwedelolactone | P12931 | SRC_HUMAN   | Homo sapiens (Human) |
| demethylwedelolactone | O14757 | CHK1_HUMAN  | Homo sapiens (Human) |
| demethylwedelolactone | P80188 | NGAL_HUMAN  | Homo sapiens (Human) |
| demethylwedelolactone | Q13126 | MTAP_HUMAN  | Homo sapiens (Human) |
| demethylwedelolactone | Q16828 | DUS6_HUMAN  | Homo sapiens (Human) |
| demethylwedelolactone | P14174 | MIF_HUMAN   | Homo sapiens (Human) |
| demethylwedelolactone | P02766 | TTHY_HUMAN  | Homo sapiens (Human) |
| demethylwedelolactone | P15121 | ALDR_HUMAN  | Homo sapiens (Human) |
| demethylwedelolactone | P11142 | HSP7C_HUMAN | Homo sapiens (Human) |
| demethylwedelolactone | P16083 | NQO2_HUMAN  | Homo sapiens (Human) |
| demethylwedelolactone | O15530 | PDPK1_HUMAN | Homo sapiens (Human) |
| demethylwedelolactone | P42330 | AK1C3_HUMAN | Homo sapiens (Human) |
| demethylwedelolactone | P00374 | DYR_HUMAN   | Homo sapiens (Human) |
| demethylwedelolactone | P29474 | NOS3_HUMAN  | Homo sapiens (Human) |
| demethylwedelolactone | P22894 | MMP8_HUMAN  | Homo sapiens (Human) |
| demethylwedelolactone | P03950 | ANGI_HUMAN  | Homo sapiens (Human) |
| demethylwedelolactone | P00746 | CFAD_HUMAN  | Homo sapiens (Human) |
| demethylwedelolactone | P06401 | PRGR_HUMAN  | Homo sapiens (Human) |
| demethylwedelolactone | P54577 | SYYC_HUMAN  | Homo sapiens (Human) |
| demethylwedelolactone | P04278 | SHBG_HUMAN  | Homo sapiens (Human) |
| demethylwedelolactone | P52895 | AK1C2_HUMAN | Homo sapiens (Human) |
| demethylwedelolactone | P78536 | ADA17_HUMAN | Homo sapiens (Human) |
| demethylwedelolactone | Q06520 | ST2A1_HUMAN | Homo sapiens (Human) |
| demethylwedelolactone | Q13370 | PDE3B_HUMAN | Homo sapiens (Human) |
| demethylwedelolactone | P28845 | DHI1_HUMAN  | Homo sapiens (Human) |
| demethylwedelolactone | O76074 | PDE5A_HUMAN | Homo sapiens (Human) |
| demethylwedelolactone | P18075 | BMP7_HUMAN  | Homo sapiens (Human) |
| demethylwedelolactone | Q03181 | PPARD_HUMAN | Homo sapiens (Human) |
| demethylwedelolactone | P04818 | TYSY_HUMAN  | Homo sapiens (Human) |
| demethylwedelolactone | P04179 | SODM_HUMAN  | Homo sapiens (Human) |
| demethylwedelolactone | P11362 | FGFR1_HUMAN | Homo sapiens (Human) |
| demethylwedelolactone | P45452 | MMP13_HUMAN | Homo sapiens (Human) |
| demethylwedelolactone | P49763 | PLGF_HUMAN  | Homo sapiens (Human) |
| demethylwedelolactone | P02774 | VTDB_HUMAN  | Homo sapiens (Human) |
| wedelolactone         | P00918 | CAH2_HUMAN  | Homo sapiens (Human) |
| wedelolactone         | P03372 | ESR1_HUMAN  | Homo sapiens (Human) |
| wedelolactone         | P00734 | THRB_HUMAN  | Homo sapiens (Human) |
| wedelolactone         | P53779 | MK10_HUMAN  | Homo sapiens (Human) |
| wedelolactone         | Q16740 | CLPP_HUMAN  | Homo sapiens (Human) |

|               |        |             |                      |
|---------------|--------|-------------|----------------------|
| wedelolactone | P00915 | CAH1_HUMAN  | Homo sapiens (Human) |
| wedelolactone | P10275 | ANDR_HUMAN  | Homo sapiens (Human) |
| wedelolactone | P45983 | MK08_HUMAN  | Homo sapiens (Human) |
| wedelolactone | P06276 | CHLE_HUMAN  | Homo sapiens (Human) |
| wedelolactone | Q16539 | MK14_HUMAN  | Homo sapiens (Human) |
| wedelolactone | P62937 | PPIA_HUMAN  | Homo sapiens (Human) |
| wedelolactone | P48736 | PK3CG_HUMAN | Homo sapiens (Human) |
| wedelolactone | P11511 | CP19A_HUMAN | Homo sapiens (Human) |
| wedelolactone | Q12884 | SEPR_HUMAN  | Homo sapiens (Human) |
| wedelolactone | P00491 | PNPH_HUMAN  | Homo sapiens (Human) |
| wedelolactone | P12643 | BMP2_HUMAN  | Homo sapiens (Human) |
| wedelolactone | P00533 | EGFR_HUMAN  | Homo sapiens (Human) |
| wedelolactone | P02652 | APOA2_HUMAN | Homo sapiens (Human) |
| wedelolactone | P53041 | PPP5_HUMAN  | Homo sapiens (Human) |
| wedelolactone | P09211 | GSTP1_HUMAN | Homo sapiens (Human) |
| wedelolactone | P23141 | EST1_HUMAN  | Homo sapiens (Human) |
| wedelolactone | P08842 | STS_HUMAN   | Homo sapiens (Human) |
| wedelolactone | P00751 | CFAB_HUMAN  | Homo sapiens (Human) |
| wedelolactone | Q08499 | PDE4D_HUMAN | Homo sapiens (Human) |
| wedelolactone | P24941 | CDK2_HUMAN  | Homo sapiens (Human) |
| wedelolactone | Q8NBQ5 | DHB11_HUMAN | Homo sapiens (Human) |
| wedelolactone | P11309 | PIM1_HUMAN  | Homo sapiens (Human) |
| wedelolactone | P02768 | ALBU_HUMAN  | Homo sapiens (Human) |
| wedelolactone | O14965 | AURKA_HUMAN | Homo sapiens (Human) |
| wedelolactone | P11142 | HSP7C_HUMAN | Homo sapiens (Human) |
| wedelolactone | Q07343 | PDE4B_HUMAN | Homo sapiens (Human) |
| wedelolactone | O43570 | CAH12_HUMAN | Homo sapiens (Human) |
| wedelolactone | P55055 | NR1H2_HUMAN | Homo sapiens (Human) |
| wedelolactone | P08254 | MMP3_HUMAN  | Homo sapiens (Human) |
| wedelolactone | P20248 | CCNA2_HUMAN | Homo sapiens (Human) |
| wedelolactone | P07900 | HS90A_HUMAN | Homo sapiens (Human) |
| wedelolactone | Q92731 | ESR2_HUMAN  | Homo sapiens (Human) |
| wedelolactone | P35221 | CTNA1_HUMAN | Homo sapiens (Human) |
| wedelolactone | P02766 | TTHY_HUMAN  | Homo sapiens (Human) |
| wedelolactone | P16083 | NQO2_HUMAN  | Homo sapiens (Human) |
| wedelolactone | P52732 | KIF11_HUMAN | Homo sapiens (Human) |
| wedelolactone | P80188 | NGAL_HUMAN  | Homo sapiens (Human) |
| wedelolactone | P00439 | PH4H_HUMAN  | Homo sapiens (Human) |
| wedelolactone | P45452 | MMP13_HUMAN | Homo sapiens (Human) |
| wedelolactone | P42330 | AK1C3_HUMAN | Homo sapiens (Human) |
| wedelolactone | O14757 | CHK1_HUMAN  | Homo sapiens (Human) |
| wedelolactone | P00390 | GSHR_HUMAN  | Homo sapiens (Human) |
| wedelolactone | P56817 | BACE1_HUMAN | Homo sapiens (Human) |
| wedelolactone | P54760 | EPHB4_HUMAN | Homo sapiens (Human) |
| wedelolactone | P29474 | NOS3_HUMAN  | Homo sapiens (Human) |
| wedelolactone | O76074 | PDE5A_HUMAN | Homo sapiens (Human) |
| wedelolactone | P49763 | PLGF_HUMAN  | Homo sapiens (Human) |
| wedelolactone | P12931 | SRC_HUMAN   | Homo sapiens (Human) |
| wedelolactone | P11766 | ADHX_HUMAN  | Homo sapiens (Human) |
| wedelolactone | P14174 | MIF_HUMAN   | Homo sapiens (Human) |
| wedelolactone | P62508 | ERR3_HUMAN  | Homo sapiens (Human) |
| wedelolactone | Q13126 | MTAP_HUMAN  | Homo sapiens (Human) |
| wedelolactone | Q16828 | DUS6_HUMAN  | Homo sapiens (Human) |
| wedelolactone | P06401 | PRGR_HUMAN  | Homo sapiens (Human) |
| wedelolactone | O15530 | PDPK1_HUMAN | Homo sapiens (Human) |
| wedelolactone | P15121 | ALDR_HUMAN  | Homo sapiens (Human) |
| wedelolactone | P43235 | CATK_HUMAN  | Homo sapiens (Human) |
| wedelolactone | P22894 | MMP8_HUMAN  | Homo sapiens (Human) |

|               |        |             |                      |
|---------------|--------|-------------|----------------------|
| wedelolactone | P00374 | DYR_HUMAN   | Homo sapiens (Human) |
| wedelolactone | P03950 | ANGI_HUMAN  | Homo sapiens (Human) |
| wedelolactone | P04278 | SHBG_HUMAN  | Homo sapiens (Human) |
| wedelolactone | P00746 | CFAD_HUMAN  | Homo sapiens (Human) |
| wedelolactone | P78536 | ADA17_HUMAN | Homo sapiens (Human) |
| wedelolactone | O15382 | BCAT2_HUMAN | Homo sapiens (Human) |
| wedelolactone | P18075 | BMP7_HUMAN  | Homo sapiens (Human) |
| wedelolactone | Q13370 | PDE3B_HUMAN | Homo sapiens (Human) |
| wedelolactone | P28845 | DHI1_HUMAN  | Homo sapiens (Human) |
| wedelolactone | P35968 | VGFR2_HUMAN | Homo sapiens (Human) |
| wedelolactone | P14061 | DHB1_HUMAN  | Homo sapiens (Human) |
| wedelolactone | Q03181 | PPARD_HUMAN | Homo sapiens (Human) |
| wedelolactone | P11362 | FGFR1_HUMAN | Homo sapiens (Human) |
| wedelolactone | P04818 | TYSY_HUMAN  | Homo sapiens (Human) |
| wedelolactone | Q06520 | ST2A1_HUMAN | Homo sapiens (Human) |
| wedelolactone | P00742 | FA10_HUMAN  | Homo sapiens (Human) |
| wedelolactone | P04179 | SODM_HUMAN  | Homo sapiens (Human) |
| wedelolactone | P02774 | VTDB_HUMAN  | Homo sapiens (Human) |
| wedelolactone | Q00796 | DHSO_HUMAN  | Homo sapiens (Human) |
| wedelolactone | P09917 | LOX5_HUMAN  | Homo sapiens (Human) |
| wedelolactone | P16152 | CBR1_HUMAN  | Homo sapiens (Human) |
| luteolin      | P11511 | CP19A_HUMAN | Homo sapiens (Human) |
| luteolin      | P00918 | CAH2_HUMAN  | Homo sapiens (Human) |
| luteolin      | P10275 | ANDR_HUMAN  | Homo sapiens (Human) |
| luteolin      | P00734 | THRB_HUMAN  | Homo sapiens (Human) |
| luteolin      | P08631 | HCK_HUMAN   | Homo sapiens (Human) |
| luteolin      | P00915 | CAH1_HUMAN  | Homo sapiens (Human) |
| luteolin      | P03372 | ESR1_HUMAN  | Homo sapiens (Human) |
| luteolin      | P24941 | CDK2_HUMAN  | Homo sapiens (Human) |
| luteolin      | P06276 | CHLE_HUMAN  | Homo sapiens (Human) |
| luteolin      | P06401 | PRGR_HUMAN  | Homo sapiens (Human) |
| luteolin      | P56817 | BACE1_HUMAN | Homo sapiens (Human) |
| luteolin      | P09211 | GSTP1_HUMAN | Homo sapiens (Human) |
| luteolin      | P00491 | PNPH_HUMAN  | Homo sapiens (Human) |
| luteolin      | P20248 | CCNA2_HUMAN | Homo sapiens (Human) |
| luteolin      | P11309 | PIM1_HUMAN  | Homo sapiens (Human) |
| luteolin      | P00390 | GSHR_HUMAN  | Homo sapiens (Human) |
| luteolin      | P48736 | PK3CG_HUMAN | Homo sapiens (Human) |
| luteolin      | P00533 | EGFR_HUMAN  | Homo sapiens (Human) |
| luteolin      | Q12884 | SEPR_HUMAN  | Homo sapiens (Human) |
| luteolin      | P08842 | STS_HUMAN   | Homo sapiens (Human) |
| luteolin      | P02652 | APOA2_HUMAN | Homo sapiens (Human) |
| luteolin      | P00751 | CFAB_HUMAN  | Homo sapiens (Human) |
| luteolin      | P02768 | ALBU_HUMAN  | Homo sapiens (Human) |
| luteolin      | P02766 | TTHY_HUMAN  | Homo sapiens (Human) |
| luteolin      | Q00534 | CDK6_HUMAN  | Homo sapiens (Human) |
| luteolin      | P53779 | MK10_HUMAN  | Homo sapiens (Human) |
| luteolin      | P45983 | MK08_HUMAN  | Homo sapiens (Human) |
| luteolin      | P35968 | VGFR2_HUMAN | Homo sapiens (Human) |
| luteolin      | P04062 | GLCM_HUMAN  | Homo sapiens (Human) |
| luteolin      | O14965 | AURKA_HUMAN | Homo sapiens (Human) |
| luteolin      | P62508 | ERR3_HUMAN  | Homo sapiens (Human) |
| luteolin      | P14061 | DHB1_HUMAN  | Homo sapiens (Human) |
| luteolin      | O14757 | CHK1_HUMAN  | Homo sapiens (Human) |
| luteolin      | P54760 | EPHB4_HUMAN | Homo sapiens (Human) |
| luteolin      | P04745 | AMY1_HUMAN  | Homo sapiens (Human) |
| luteolin      | P29474 | NOS3_HUMAN  | Homo sapiens (Human) |
| luteolin      | P80188 | NGAL_HUMAN  | Homo sapiens (Human) |

|          |        |             |                      |
|----------|--------|-------------|----------------------|
| luteolin | O15382 | BCAT2_HUMAN | Homo sapiens (Human) |
| luteolin | P03950 | ANGI_HUMAN  | Homo sapiens (Human) |
| luteolin | P00439 | PH4H_HUMAN  | Homo sapiens (Human) |
| luteolin | P78536 | ADA17_HUMAN | Homo sapiens (Human) |
| luteolin | P16152 | CBR1_HUMAN  | Homo sapiens (Human) |
| luteolin | Q00796 | DHSO_HUMAN  | Homo sapiens (Human) |
| luteolin | P27338 | AOFB_HUMAN  | Homo sapiens (Human) |
| luteolin | P11142 | HSP7C_HUMAN | Homo sapiens (Human) |
| luteolin | P78368 | KC1G2_HUMAN | Homo sapiens (Human) |
| luteolin | P14174 | MIF_HUMAN   | Homo sapiens (Human) |
| luteolin | Q16828 | DUS6_HUMAN  | Homo sapiens (Human) |
| luteolin | P06737 | PYGL_HUMAN  | Homo sapiens (Human) |
| luteolin | P04278 | SHBG_HUMAN  | Homo sapiens (Human) |
| luteolin | P15559 | NQO1_HUMAN  | Homo sapiens (Human) |
| luteolin | P18075 | BMP7_HUMAN  | Homo sapiens (Human) |
| luteolin | Q08499 | PDE4D_HUMAN | Homo sapiens (Human) |
| luteolin | Q13126 | MTAP_HUMAN  | Homo sapiens (Human) |
| luteolin | P19793 | RXRA_HUMAN  | Homo sapiens (Human) |
| luteolin | P15121 | ALDR_HUMAN  | Homo sapiens (Human) |
| luteolin | P45452 | MMP13_HUMAN | Homo sapiens (Human) |
| luteolin | P11766 | ADHX_HUMAN  | Homo sapiens (Human) |
| luteolin | O15496 | PA2GX_HUMAN | Homo sapiens (Human) |
| luteolin | P08254 | MMP3_HUMAN  | Homo sapiens (Human) |
| luteolin | P23141 | EST1_HUMAN  | Homo sapiens (Human) |
| luteolin | Q06520 | ST2A1_HUMAN | Homo sapiens (Human) |
| luteolin | O15530 | PDPK1_HUMAN | Homo sapiens (Human) |
| luteolin | P17707 | DCAM_HUMAN  | Homo sapiens (Human) |
| luteolin | P31749 | AKT1_HUMAN  | Homo sapiens (Human) |
| luteolin | P12931 | SRC_HUMAN   | Homo sapiens (Human) |
| luteolin | P02774 | VTDB_HUMAN  | Homo sapiens (Human) |
| luteolin | P00374 | DYR_HUMAN   | Homo sapiens (Human) |
| luteolin | P07900 | HS90A_HUMAN | Homo sapiens (Human) |
| luteolin | P28845 | DHI1_HUMAN  | Homo sapiens (Human) |
| luteolin | P00742 | FA10_HUMAN  | Homo sapiens (Human) |
| luteolin | Q16539 | MK14_HUMAN  | Homo sapiens (Human) |
| luteolin | P00746 | CFAD_HUMAN  | Homo sapiens (Human) |
| luteolin | P49354 | FNTA_HUMAN  | Homo sapiens (Human) |
| luteolin | Q03181 | PPARD_HUMAN | Homo sapiens (Human) |
| luteolin | P08235 | MCR_HUMAN   | Homo sapiens (Human) |
| luteolin | P52732 | KIF11_HUMAN | Homo sapiens (Human) |
| luteolin | P35558 | PCKGC_HUMAN | Homo sapiens (Human) |
| luteolin | P04818 | TYSY_HUMAN  | Homo sapiens (Human) |
| luteolin | P54577 | SYYC_HUMAN  | Homo sapiens (Human) |
| luteolin | Q02127 | PYRD_HUMAN  | Homo sapiens (Human) |
| luteolin | Q9NPH5 | NOX4_HUMAN  | Homo sapiens (Human) |
| luteolin | Q15078 | CD5R1_HUMAN | Homo sapiens (Human) |
| luteolin | Q00535 | CDK5_HUMAN  | Homo sapiens (Human) |
| luteolin | P47989 | XDH_HUMAN   | Homo sapiens (Human) |
| luteolin | P21397 | AOFA_HUMAN  | Homo sapiens (Human) |
| luteolin | P36888 | FLT3_HUMAN  | Homo sapiens (Human) |
| luteolin | Q8WWL7 | CCNB3_HUMAN | Homo sapiens (Human) |
| luteolin | P06493 | CDK1_HUMAN  | Homo sapiens (Human) |
| luteolin | P14635 | CCNB1_HUMAN | Homo sapiens (Human) |
| luteolin | O95067 | CCNB2_HUMAN | Homo sapiens (Human) |
| luteolin | P09917 | LOX5_HUMAN  | Homo sapiens (Human) |
| luteolin | P30542 | AA1R_HUMAN  | Homo sapiens (Human) |
| luteolin | P43166 | CAH7_HUMAN  | Homo sapiens (Human) |
| luteolin | Q04760 | LGUL_HUMAN  | Homo sapiens (Human) |

|           |        |             |                      |
|-----------|--------|-------------|----------------------|
| luteolin  | P05067 | A4_HUMAN    | Homo sapiens (Human) |
| luteolin  | P43405 | KSYK_HUMAN  | Homo sapiens (Human) |
| luteolin  | P49841 | GSK3B_HUMAN | Homo sapiens (Human) |
| luteolin  | P09874 | PARP1_HUMAN | Homo sapiens (Human) |
| luteolin  | P14780 | MMP9_HUMAN  | Homo sapiens (Human) |
| luteolin  | O43570 | CAH12_HUMAN | Homo sapiens (Human) |
| luteolin  | P08253 | MMP2_HUMAN  | Homo sapiens (Human) |
| luteolin  | P22748 | CAH4_HUMAN  | Homo sapiens (Human) |
| luteolin  | P39900 | MMP12_HUMAN | Homo sapiens (Human) |
| luteolin  | P28907 | CD38_HUMAN  | Homo sapiens (Human) |
| luteolin  | Q16678 | CP1B1_HUMAN | Homo sapiens (Human) |
| luteolin  | Q9UNQ0 | ABCG2_HUMAN | Homo sapiens (Human) |
| luteolin  | O60218 | AK1BA_HUMAN | Homo sapiens (Human) |
| luteolin  | Q9H2K2 | TNKS2_HUMAN | Homo sapiens (Human) |
| luteolin  | O95271 | TNKS1_HUMAN | Homo sapiens (Human) |
| luteolin  | P11387 | TOP1_HUMAN  | Homo sapiens (Human) |
| luteolin  | P05089 | ARGI1_HUMAN | Homo sapiens (Human) |
| luteolin  | Q13332 | PTPRS_HUMAN | Homo sapiens (Human) |
| luteolin  | P33527 | MRP1_HUMAN  | Homo sapiens (Human) |
| luteolin  | P22303 | ACES_HUMAN  | Homo sapiens (Human) |
| quercetin | Q9NPH5 | NOX4_HUMAN  | Homo sapiens (Human) |
| quercetin | P30518 | V2R_HUMAN   | Homo sapiens (Human) |
| quercetin | P15121 | ALDR_HUMAN  | Homo sapiens (Human) |
| quercetin | P47989 | XDH_HUMAN   | Homo sapiens (Human) |
| quercetin | P21397 | AOFA_HUMAN  | Homo sapiens (Human) |
| quercetin | P08069 | IGF1R_HUMAN | Homo sapiens (Human) |
| quercetin | P36888 | FLT3_HUMAN  | Homo sapiens (Human) |
| quercetin | P11511 | CP19A_HUMAN | Homo sapiens (Human) |
| quercetin | P00533 | EGFR_HUMAN  | Homo sapiens (Human) |
| quercetin | P00734 | THRB_HUMAN  | Homo sapiens (Human) |
| quercetin | P00918 | CAH2_HUMAN  | Homo sapiens (Human) |
| quercetin | P11309 | PIM1_HUMAN  | Homo sapiens (Human) |
| quercetin | P09917 | LOX5_HUMAN  | Homo sapiens (Human) |
| quercetin | Q96GD4 | AURKB_HUMAN | Homo sapiens (Human) |
| quercetin | P21917 | DRD4_HUMAN  | Homo sapiens (Human) |
| quercetin | P30542 | AA1R_HUMAN  | Homo sapiens (Human) |
| quercetin | P43166 | CAH7_HUMAN  | Homo sapiens (Human) |
| quercetin | Q04760 | LGUL_HUMAN  | Homo sapiens (Human) |
| quercetin | P05164 | PERM_HUMAN  | Homo sapiens (Human) |
| quercetin | P27986 | P85A_HUMAN  | Homo sapiens (Human) |
| quercetin | P29274 | AA2AR_HUMAN | Homo sapiens (Human) |
| quercetin | P53355 | DAPK1_HUMAN | Homo sapiens (Human) |
| quercetin | P06737 | PYGL_HUMAN  | Homo sapiens (Human) |
| quercetin | P00915 | CAH1_HUMAN  | Homo sapiens (Human) |
| quercetin | P49841 | GSK3B_HUMAN | Homo sapiens (Human) |
| quercetin | P12931 | SRC_HUMAN   | Homo sapiens (Human) |
| quercetin | Q05397 | FAK1_HUMAN  | Homo sapiens (Human) |
| quercetin | P37059 | DHB2_HUMAN  | Homo sapiens (Human) |
| quercetin | P35968 | VGFR2_HUMAN | Homo sapiens (Human) |
| quercetin | P45452 | MMP13_HUMAN | Homo sapiens (Human) |
| quercetin | P08254 | MMP3_HUMAN  | Homo sapiens (Human) |
| quercetin | P07451 | CAH3_HUMAN  | Homo sapiens (Human) |
| quercetin | P16050 | LOX15_HUMAN | Homo sapiens (Human) |
| quercetin | P33527 | MRP1_HUMAN  | Homo sapiens (Human) |
| quercetin | P53350 | PLK1_HUMAN  | Homo sapiens (Human) |
| quercetin | P23280 | CAH6_HUMAN  | Homo sapiens (Human) |
| quercetin | P06493 | CDK1_HUMAN  | Homo sapiens (Human) |
| quercetin | P14780 | MMP9_HUMAN  | Homo sapiens (Human) |

|           |        |             |                      |
|-----------|--------|-------------|----------------------|
| quercetin | O43570 | CAH12_HUMAN | Homo sapiens (Human) |
| quercetin | P08253 | MMP2_HUMAN  | Homo sapiens (Human) |
| quercetin | Q16512 | PKN1_HUMAN  | Homo sapiens (Human) |
| quercetin | Q9ULX7 | CAH14_HUMAN | Homo sapiens (Human) |
| quercetin | Q16790 | CAH9_HUMAN  | Homo sapiens (Human) |
| quercetin | P68400 | CSK21_HUMAN | Homo sapiens (Human) |
| quercetin | P18054 | LOX12_HUMAN | Homo sapiens (Human) |
| quercetin | P08581 | MET_HUMAN   | Homo sapiens (Human) |
| quercetin | P22748 | CAH4_HUMAN  | Homo sapiens (Human) |
| quercetin | P51955 | NEK2_HUMAN  | Homo sapiens (Human) |
| quercetin | P25024 | CXCR1_HUMAN | Homo sapiens (Human) |
| quercetin | Q13554 | KCC2B_HUMAN | Homo sapiens (Human) |
| quercetin | Q9UM73 | ALK_HUMAN   | Homo sapiens (Human) |
| quercetin | P31749 | AKT1_HUMAN  | Homo sapiens (Human) |
| quercetin | P08183 | MDR1_HUMAN  | Homo sapiens (Human) |
| quercetin | Q9HC98 | NEK6_HUMAN  | Homo sapiens (Human) |
| quercetin | P04054 | PA21B_HUMAN | Homo sapiens (Human) |
| quercetin | P35218 | CAH5A_HUMAN | Homo sapiens (Human) |
| quercetin | P56817 | BACE1_HUMAN | Homo sapiens (Human) |
| quercetin | Q16678 | CP1B1_HUMAN | Homo sapiens (Human) |
| quercetin | P30530 | UFO_HUMAN   | Homo sapiens (Human) |
| quercetin | Q9UNQ0 | ABCG2_HUMAN | Homo sapiens (Human) |
| quercetin | O60285 | NUAK1_HUMAN | Homo sapiens (Human) |
| quercetin | P52895 | AK1C2_HUMAN | Homo sapiens (Human) |
| quercetin | Q04828 | AK1C1_HUMAN | Homo sapiens (Human) |
| quercetin | P42330 | AK1C3_HUMAN | Homo sapiens (Human) |
| quercetin | P17516 | AK1C4_HUMAN | Homo sapiens (Human) |
| quercetin | Q8N1Q1 | CAH13_HUMAN | Homo sapiens (Human) |
| quercetin | P14550 | AK1A1_HUMAN | Homo sapiens (Human) |
| quercetin | Q9HC97 | GPR35_HUMAN | Homo sapiens (Human) |
| quercetin | P43405 | KSYK_HUMAN  | Homo sapiens (Human) |
| quercetin | P10636 | TAU_HUMAN   | Homo sapiens (Human) |
| quercetin | B2RXH2 | KDM4E_HUMAN | Homo sapiens (Human) |
| quercetin | P11388 | TOP2A_HUMAN | Homo sapiens (Human) |
| quercetin | P06213 | INSR_HUMAN  | Homo sapiens (Human) |
| quercetin | P22303 | ACES_HUMAN  | Homo sapiens (Human) |
| quercetin | Q15746 | MYLK_HUMAN  | Homo sapiens (Human) |
| quercetin | P48736 | PK3CG_HUMAN | Homo sapiens (Human) |
| quercetin | P27695 | APEX1_HUMAN | Homo sapiens (Human) |
| quercetin | P08631 | HCK_HUMAN   | Homo sapiens (Human) |
| quercetin | P03372 | ESR1_HUMAN  | Homo sapiens (Human) |
| quercetin | P00751 | CFAB_HUMAN  | Homo sapiens (Human) |
| quercetin | P06276 | CHLE_HUMAN  | Homo sapiens (Human) |
| quercetin | P06401 | PRGR_HUMAN  | Homo sapiens (Human) |
| quercetin | P62937 | PPIA_HUMAN  | Homo sapiens (Human) |
| quercetin | P53779 | MK10_HUMAN  | Homo sapiens (Human) |
| quercetin | P45983 | MK08_HUMAN  | Homo sapiens (Human) |
| quercetin | Q00534 | CDK6_HUMAN  | Homo sapiens (Human) |
| quercetin | P04062 | GLCM_HUMAN  | Homo sapiens (Human) |
| quercetin | Q12884 | SEPR_HUMAN  | Homo sapiens (Human) |
| quercetin | P02766 | TTHY_HUMAN  | Homo sapiens (Human) |
| quercetin | P09211 | GSTP1_HUMAN | Homo sapiens (Human) |
| quercetin | P24941 | CDK2_HUMAN  | Homo sapiens (Human) |
| quercetin | P26196 | DDX6_HUMAN  | Homo sapiens (Human) |
| quercetin | P00491 | PNPH_HUMAN  | Homo sapiens (Human) |
| quercetin | Q9NP99 | TREM1_HUMAN | Homo sapiens (Human) |
| quercetin | P00390 | GSHR_HUMAN  | Homo sapiens (Human) |
| quercetin | P20248 | CCNA2_HUMAN | Homo sapiens (Human) |



|                   |        |             |                      |
|-------------------|--------|-------------|----------------------|
| quercetin         | O14965 | AURKA_HUMAN | Homo sapiens (Human) |
| quercetin         | P10275 | ANDR_HUMAN  | Homo sapiens (Human) |
| quercetin         | P55055 | NR1H2_HUMAN | Homo sapiens (Human) |
| quercetin         | O14757 | CHK1_HUMAN  | Homo sapiens (Human) |
| quercetin         | P80188 | NGAL_HUMAN  | Homo sapiens (Human) |
| quercetin         | P03950 | ANGI_HUMAN  | Homo sapiens (Human) |
| quercetin         | O15382 | BCAT2_HUMAN | Homo sapiens (Human) |
| quercetin         | P00439 | PH4H_HUMAN  | Homo sapiens (Human) |
| quercetin         | P11142 | HSP7C_HUMAN | Homo sapiens (Human) |
| quercetin         | P04745 | AMY1_HUMAN  | Homo sapiens (Human) |
| quercetin         | P27338 | AOFB_HUMAN  | Homo sapiens (Human) |
| quercetin         | Q15078 | CD5R1_HUMAN | Homo sapiens (Human) |
| quercetin         | P16152 | CBR1_HUMAN  | Homo sapiens (Human) |
| quercetin         | P78368 | KC1G2_HUMAN | Homo sapiens (Human) |
| quercetin         | P04278 | SHBG_HUMAN  | Homo sapiens (Human) |
| quercetin         | O15530 | PDPK1_HUMAN | Homo sapiens (Human) |
| quercetin         | P00736 | C1R_HUMAN   | Homo sapiens (Human) |
| quercetin         | Q00796 | DHSO_HUMAN  | Homo sapiens (Human) |
| quercetin         | P14061 | DHB1_HUMAN  | Homo sapiens (Human) |
| quercetin         | P53582 | MAP11_HUMAN | Homo sapiens (Human) |
| quercetin         | Q13126 | MTAP_HUMAN  | Homo sapiens (Human) |
| quercetin         | P15559 | NQO1_HUMAN  | Homo sapiens (Human) |
| quercetin         | Q16539 | MK14_HUMAN  | Homo sapiens (Human) |
| quercetin         | P18075 | BMP7_HUMAN  | Homo sapiens (Human) |
| quercetin         | P78536 | ADA17_HUMAN | Homo sapiens (Human) |
| quercetin         | O15496 | PA2GX_HUMAN | Homo sapiens (Human) |
| quercetin         | P54760 | EPHB4_HUMAN | Homo sapiens (Human) |
| quercetin         | Q15382 | RHEB_HUMAN  | Homo sapiens (Human) |
| quercetin         | P07858 | CATB_HUMAN  | Homo sapiens (Human) |
| quercetin         | P17707 | DCAM_HUMAN  | Homo sapiens (Human) |
| quercetin         | P62508 | ERR3_HUMAN  | Homo sapiens (Human) |
| quercetin         | P00374 | DYR_HUMAN   | Homo sapiens (Human) |
| quercetin         | P09960 | LKHA4_HUMAN | Homo sapiens (Human) |
| quercetin         | P27707 | DCK_HUMAN   | Homo sapiens (Human) |
| quercetin         | P55210 | CASP7_HUMAN | Homo sapiens (Human) |
| quercetin         | Q08499 | PDE4D_HUMAN | Homo sapiens (Human) |
| quercetin         | P19971 | TYPH_HUMAN  | Homo sapiens (Human) |
| quercetin         | P00746 | CFAD_HUMAN  | Homo sapiens (Human) |
| quercetin         | P00797 | RENI_HUMAN  | Homo sapiens (Human) |
| quercetin         | P49354 | FNTA_HUMAN  | Homo sapiens (Human) |
| quercetin         | Q03181 | PPARD_HUMAN | Homo sapiens (Human) |
| quercetin         | P28845 | DHI1_HUMAN  | Homo sapiens (Human) |
| quercetin         | P14174 | MIF_HUMAN   | Homo sapiens (Human) |
| quercetin         | P11362 | FGFR1_HUMAN | Homo sapiens (Human) |
| 3'-O-Methylorobol | P00918 | CAH2_HUMAN  | Homo sapiens (Human) |
| 3'-O-Methylorobol | Q92731 | ESR2_HUMAN  | Homo sapiens (Human) |
| 3'-O-Methylorobol | P03372 | ESR1_HUMAN  | Homo sapiens (Human) |
| 3'-O-Methylorobol | P08254 | MMP3_HUMAN  | Homo sapiens (Human) |
| 3'-O-Methylorobol | P11309 | PIM1_HUMAN  | Homo sapiens (Human) |
| 3'-O-Methylorobol | P00915 | CAH1_HUMAN  | Homo sapiens (Human) |
| 3'-O-Methylorobol | P06276 | CHLE_HUMAN  | Homo sapiens (Human) |
| 3'-O-Methylorobol | P35968 | VGFR2_HUMAN | Homo sapiens (Human) |
| 3'-O-Methylorobol | P53779 | MK10_HUMAN  | Homo sapiens (Human) |
| 3'-O-Methylorobol | P00491 | PNPH_HUMAN  | Homo sapiens (Human) |
| 3'-O-Methylorobol | Q16539 | MK14_HUMAN  | Homo sapiens (Human) |
| 3'-O-Methylorobol | P00533 | EGFR_HUMAN  | Homo sapiens (Human) |
| 3'-O-Methylorobol | P23141 | EST1_HUMAN  | Homo sapiens (Human) |
| 3'-O-Methylorobol | P10275 | ANDR_HUMAN  | Homo sapiens (Human) |

|                   |        |             |                      |
|-------------------|--------|-------------|----------------------|
| 3'-O-Methylorobol | P04062 | GLCM_HUMAN  | Homo sapiens (Human) |
| 3'-O-Methylorobol | Q07343 | PDE4B_HUMAN | Homo sapiens (Human) |
| 3'-O-Methylorobol | P11511 | CP19A_HUMAN | Homo sapiens (Human) |
| 3'-O-Methylorobol | P45983 | MK08_HUMAN  | Homo sapiens (Human) |
| 3'-O-Methylorobol | O14757 | CHK1_HUMAN  | Homo sapiens (Human) |
| 3'-O-Methylorobol | P24941 | CDK2_HUMAN  | Homo sapiens (Human) |
| 3'-O-Methylorobol | P07339 | CATD_HUMAN  | Homo sapiens (Human) |
| 3'-O-Methylorobol | P00751 | CFAB_HUMAN  | Homo sapiens (Human) |
| 3'-O-Methylorobol | P02768 | ALBU_HUMAN  | Homo sapiens (Human) |
| 3'-O-Methylorobol | P08842 | STS_HUMAN   | Homo sapiens (Human) |
| 3'-O-Methylorobol | P02652 | APOA2_HUMAN | Homo sapiens (Human) |
| 3'-O-Methylorobol | P11362 | FGFR1_HUMAN | Homo sapiens (Human) |
| 3'-O-Methylorobol | P78536 | ADA17_HUMAN | Homo sapiens (Human) |
| 3'-O-Methylorobol | P06401 | PRGR_HUMAN  | Homo sapiens (Human) |
| 3'-O-Methylorobol | P80188 | NGAL_HUMAN  | Homo sapiens (Human) |
| 3'-O-Methylorobol | P45452 | MMP13_HUMAN | Homo sapiens (Human) |
| 3'-O-Methylorobol | P56817 | BACE1_HUMAN | Homo sapiens (Human) |
| 3'-O-Methylorobol | P04278 | SHBG_HUMAN  | Homo sapiens (Human) |
| 3'-O-Methylorobol | O15382 | BCAT2_HUMAN | Homo sapiens (Human) |
| 3'-O-Methylorobol | P11142 | HSP7C_HUMAN | Homo sapiens (Human) |
| 3'-O-Methylorobol | P27338 | AOFB_HUMAN  | Homo sapiens (Human) |
| 3'-O-Methylorobol | P18075 | BMP7_HUMAN  | Homo sapiens (Human) |
| 3'-O-Methylorobol | Q08499 | PDE4D_HUMAN | Homo sapiens (Human) |
| 3'-O-Methylorobol | Q16828 | DUS6_HUMAN  | Homo sapiens (Human) |
| 3'-O-Methylorobol | P19793 | RXRA_HUMAN  | Homo sapiens (Human) |
| 3'-O-Methylorobol | P14174 | MIF_HUMAN   | Homo sapiens (Human) |
| 3'-O-Methylorobol | P00734 | THRB_HUMAN  | Homo sapiens (Human) |
| 3'-O-Methylorobol | P06737 | PYGL_HUMAN  | Homo sapiens (Human) |
| 3'-O-Methylorobol | P09960 | LKHA4_HUMAN | Homo sapiens (Human) |
| 3'-O-Methylorobol | P49354 | FNTA_HUMAN  | Homo sapiens (Human) |
| 3'-O-Methylorobol | P03950 | ANGI_HUMAN  | Homo sapiens (Human) |
| 3'-O-Methylorobol | P22894 | MMP8_HUMAN  | Homo sapiens (Human) |
| 3'-O-Methylorobol | P00374 | DYR_HUMAN   | Homo sapiens (Human) |
| 3'-O-Methylorobol | P00390 | GSHR_HUMAN  | Homo sapiens (Human) |
| 3'-O-Methylorobol | P62508 | ERR3_HUMAN  | Homo sapiens (Human) |
| 3'-O-Methylorobol | Q00534 | CDK6_HUMAN  | Homo sapiens (Human) |
| 3'-O-Methylorobol | P04745 | AMY1_HUMAN  | Homo sapiens (Human) |
| 3'-O-Methylorobol | P50579 | MAP2_HUMAN  | Homo sapiens (Human) |
| 3'-O-Methylorobol | P31749 | AKT1_HUMAN  | Homo sapiens (Human) |
| 3'-O-Methylorobol | P27487 | DPP4_HUMAN  | Homo sapiens (Human) |
| 3'-O-Methylorobol | P07858 | CATB_HUMAN  | Homo sapiens (Human) |
| 3'-O-Methylorobol | P14061 | DHB1_HUMAN  | Homo sapiens (Human) |
| 3'-O-Methylorobol | P28845 | DHI1_HUMAN  | Homo sapiens (Human) |
| 3'-O-Methylorobol | P15121 | ALDR_HUMAN  | Homo sapiens (Human) |
| 3'-O-Methylorobol | P07900 | HS90A_HUMAN | Homo sapiens (Human) |
| 3'-O-Methylorobol | P00742 | FA10_HUMAN  | Homo sapiens (Human) |
| 3'-O-Methylorobol | Q03181 | PPARD_HUMAN | Homo sapiens (Human) |
| 3'-O-Methylorobol | P29474 | NOS3_HUMAN  | Homo sapiens (Human) |
| 3'-O-Methylorobol | Q13370 | PDE3B_HUMAN | Homo sapiens (Human) |
| 3'-O-Methylorobol | P54760 | EPHB4_HUMAN | Homo sapiens (Human) |
| 3'-O-Methylorobol | P52732 | KIF11_HUMAN | Homo sapiens (Human) |
| 3'-O-Methylorobol | Q02127 | PYRD_HUMAN  | Homo sapiens (Human) |
| 3'-O-Methylorobol | P78368 | KC1G2_HUMAN | Homo sapiens (Human) |
| 3'-O-Methylorobol | Q06520 | ST2A1_HUMAN | Homo sapiens (Human) |
| 3'-O-Methylorobol | P53350 | PLK1_HUMAN  | Homo sapiens (Human) |
| 3'-O-Methylorobol | P35558 | PCKGC_HUMAN | Homo sapiens (Human) |
| 3'-O-Methylorobol | P02774 | VTDB_HUMAN  | Homo sapiens (Human) |
| 3'-O-Methylorobol | P20248 | CCNA2_HUMAN | Homo sapiens (Human) |

|                   |        |             |                      |
|-------------------|--------|-------------|----------------------|
| 3'-O-Methylorobol | Q13126 | MTAP_HUMAN  | Homo sapiens (Human) |
| 3'-O-Methylorobol | O76074 | PDE5A_HUMAN | Homo sapiens (Human) |
| 3'-O-Methylorobol | O15530 | PDPK1_HUMAN | Homo sapiens (Human) |
| 3'-O-Methylorobol | P04818 | TYSY_HUMAN  | Homo sapiens (Human) |
| 3'-O-Methylorobol | P17707 | DCAM_HUMAN  | Homo sapiens (Human) |

| Targets of chemicals after removing the overlap |            |
|-------------------------------------------------|------------|
| Entry                                           | Gene names |
| P52895                                          | AKR1C2     |
| P27338                                          | MAOB       |
| P11309                                          | PIM1       |
| P12643                                          | BMP2       |
| P08842                                          | STS        |
| P49137                                          | MAPKAPK2   |
| P02652                                          | APOA2      |
| P55210                                          | CASP7      |
| P10828                                          | THRB       |
| P00918                                          | CA2        |
| P02768                                          | ALB        |
| P28482                                          | MAPK1      |
| P06401                                          | PGR        |
| P08235                                          | NR3C2      |
| P14061                                          | HSD17B1    |
| P45452                                          | MMP13      |
| P52732                                          | KIF11      |
| P35398                                          | RORA       |
| O76054                                          | SEC14L2    |
| P02774                                          | GC         |
| P03372                                          | ESR1       |
| Q06520                                          | SULT2A1    |
| P20701                                          | ITGAL      |
| P78536                                          | ADAM17     |
| Q16539                                          | MAPK14     |
| P45983                                          | MAPK8      |
| P28845                                          | HSD11B1    |
| P02766                                          | TTR        |
| P24941                                          | CDK2       |
| P10275                                          | AR         |
| P12931                                          | SRC        |
| Q07343                                          | PDE4B      |
| P00533                                          | EGFR       |
| Q96RI1                                          | NR1H4      |
| P0DP23                                          | CALM1      |
| P0DP24                                          | CALM2      |
| P0DP25                                          | CALM3      |
| O15530                                          | PDPK1      |
| P63316                                          | TNNC1      |
| P00734                                          | F2         |
| P56817                                          | BACE1      |
| Q06124                                          | PTPN11     |
| P11086                                          | PNMT       |
| P53041                                          | PPP5C      |
| P36897                                          | TGFBR1     |
| P04278                                          | SHBG       |
| P15056                                          | BRAF       |
| P00915                                          | CA1        |
| P23141                                          | CES1       |

|        |         |
|--------|---------|
| P15121 | AKR1B1  |
| P08758 | ANXA5   |
| P35968 | KDR     |
| O14757 | CHEK1   |
| P37231 | PPARG   |
| P27487 | DPP4    |
| Q16828 | DUSP6   |
| O43617 | TRAPPC3 |
| P49638 | TTPA    |
| O60760 | HPGDS   |
| P50579 | METAP2  |
| P04818 | TYMS    |
| Q02127 | DHODH   |
| Q14994 | NR1I3   |
| P08263 | GSTA1   |
| P00742 | F10     |
| P06276 | BCHE    |
| P55263 | ADK     |
| P42768 | WAS     |
| Q9BY41 | HDAC8   |
| P08069 | IGF1R   |
| Q13126 | MTAP    |
| Q04828 | AKR1C1  |
| O00204 | SULT2B1 |
| P02753 | RBP4    |
| P29474 | NOS3    |
| P43405 | SYK     |
| Q13133 | NR1H3   |
| P19793 | RXRA    |
| P54760 | EPHB4   |
| P11474 | ESRRA   |
| P15559 | NQO1    |
| P62508 | ESRRG   |
| P55055 | NR1H2   |
| P00326 | ADH1C   |
| P04035 | HMGCR   |
| Q16850 | CYP51A1 |
| Q9NPH5 | NOX4    |
| P47989 | XDH     |
| P14679 | TYR     |
| P36888 | FLT3    |
| P09917 | ALOX5   |
| P43166 | CA7     |
| P37059 | HSD17B2 |
| P33527 | ABCC1   |
| P35869 | AHR     |
| O43570 | CA12    |
| P08183 | ABCB1   |
| Q16678 | CYP1B1  |
| Q9UNQ0 | ABCG2   |
| P30542 | ADORA1  |
| P22748 | CA4     |
| P22303 | ACHE    |
| P21397 | MAOA    |
| Q04760 | GLO1    |
| P49841 | GSK3B   |
| P14780 | MMP9    |
| P08253 | MMP2    |

|        |          |
|--------|----------|
| P16050 | ALOX15   |
| P18054 | ALOX12   |
| Q13332 | PTPRS    |
| P08631 | HCK      |
| Q00534 | CDK6     |
| P62937 | PPIA     |
| P04062 | GBA      |
| Q9NP99 | TREM1    |
| P00751 | CFB      |
| P00390 | GSR      |
| P53779 | MAPK10   |
| Q15078 | CDK5R1   |
| P03950 | ANG      |
| O15382 | BCAT2    |
| P11142 | HSPA8    |
| O14965 | AURKA    |
| P00736 | C1R      |
| P06737 | PYGL     |
| P07858 | CTSB     |
| P00491 | PNP      |
| Q08499 | PDE4D    |
| P27707 | DCK      |
| O15496 | PLA2G10  |
| P07900 | HSP90AA1 |
| P00374 | DHFR     |
| P09960 | LTA4H    |
| P20248 | CCNA2    |
| P08254 | MMP3     |
| P35558 | PCK1     |
| P39900 | MMP12    |
| P11511 | CYP19A1  |
| P09211 | GSTP1    |
| Q12884 | FAP      |
| P48736 | PIK3CG   |
| Q16740 | CLPP     |
| P25774 | CTSS     |
| Q00796 | SORD     |
| P00749 | PLAU     |
| P80188 | LCN2     |
| P00439 | PAH      |
| P04745 | AMY1A    |
| P78368 | CSNK1G2  |
| P16152 | CBR1     |
| P17707 | AMD1     |
| P17342 | NPR3     |
| P47929 | LGALS7   |
| P18075 | BMP7     |
| P19971 | TYMP     |
| P11766 | ADH5     |
| Q15382 | RHEB     |
| P23526 | AHCY     |
| P00746 | CFD      |
| P01709 | IGLV2-8  |
| P07339 | CTSD     |
| Q9BW91 | NUDT9    |
| P62942 | FKBP1A   |
| O60911 | CTSV     |
| P53582 | METAP1   |

|        |          |
|--------|----------|
| P26196 | DDX6     |
| P37173 | TGFBR2   |
| P23946 | CMA1     |
| Q92731 | ESR2     |
| Q8NBQ5 | HSD17B11 |
| P25311 | AZGP1    |
| Q9P2W7 | B3GAT1   |
| P19367 | HK1      |
| Q05315 | CLC      |
| P51570 | GALK1    |
| P16083 | NQO2     |
| Q9NVS9 | PNPO     |
| Q13231 | CHIT1    |
| P48449 | LSS      |
| P18031 | PTPN1    |
| P02743 | APCS     |
| P53350 | PLK1     |
| P14174 | MIF      |
| Q99933 | BAG1     |
| P49354 | FNTA     |
| P31749 | AKT1     |
| P43235 | CTSK     |
| P42330 | AKR1C3   |
| Q96T66 | NMNAT3   |
| P05451 | REG1A    |
| P11362 | FGFR1    |
| Q13370 | PDE3B    |
| P29218 | IMPA1    |
| P09874 | PARP1    |
| P00325 | ADH1B    |
| O76074 | PDE5A    |
| P04746 | AMY2A    |
| P15090 | FABP4    |
| Q96AZ6 | ISG20    |
| P23919 | DTYMK    |
| P43155 | CRAT     |
| P06239 | LCK      |
| P49789 | FHIT     |
| P11712 | CYP2C9   |
| P84077 | ARF1     |
| Q03181 | PPARD    |
| P00797 | REN      |
| P08581 | MET      |
| P61586 | RHOA     |
| P11586 | MTHFD1   |
| P16442 | ABO      |
| O43252 | PAPSS1   |
| P22894 | MMP8     |
| P52333 | JAK3     |
| Q08881 | ITK      |
| Q07912 | TNK2     |
| P34896 | SHMT1    |
| P15153 | RAC2     |
| P05019 | IGF1     |
| P01009 | SERPINA1 |
| Q10588 | BST1     |
| P05091 | ALDH2    |
| P54577 | YARS     |

|        |         |
|--------|---------|
| P34913 | EPHX2   |
| Q00987 | MDM2    |
| P04179 | SOD2    |
| P30043 | BLVRB   |
| P21802 | FGFR2   |
| Q16773 | KYAT1   |
| P00747 | PLG     |
| P49366 | DHPS    |
| P08709 | F7      |
| Q14541 | HNF4G   |
| O75469 | NR1I2   |
| P08246 | ELANE   |
| P49763 | PGF     |
| P42574 | CASP3   |
| P13598 | ICAM2   |
| Q9BZR6 | RTN4R   |
| P24071 | FCAR    |
| P53355 | DAPK1   |
| P07686 | HEXB    |
| P35221 | CTNNA1  |
| P16109 | SELP    |
| Q01469 | FABP5   |
| P68400 | CSNK2A1 |
| P10827 | THRA    |
| P06126 | CD1A    |
| P41240 | CSK     |
| Q07869 | PPARA   |
| Q9P286 | PAK5    |
| P32320 | CDA     |
| Q16769 | QPCT    |
| P09237 | MMP7    |
| P12268 | IMPDH2  |
| P62166 | NCS1    |
| Q07960 | ARHGAP1 |
| Q08188 | TGM3    |
| Q9BZX2 | UCK2    |
| P60568 | IL2     |
| P06746 | POLB    |
| O60218 | AKR1B10 |
| P51449 | RORC    |
| P10586 | PTPRF   |
| P17706 | PTPN2   |
| P24666 | ACP1    |
| P30305 | CDC25B  |
| P15309 | ACPP    |
| O15540 | FABP7   |
| P05162 | LGALS2  |
| Q16836 | HADH    |
| P60174 | TPI1    |
| P62491 | RAB11A  |
| P07195 | LDHB    |
| P35228 | NOS2    |
| P17931 | LGALS3  |
| Q00535 | CDK5    |
| Q8WWL7 | CCNB3   |
| P06493 | CDK1    |
| P14635 | CCNB1   |
| O95067 | CCNB2   |

|        |         |
|--------|---------|
| P05067 | APP     |
| P28907 | CD38    |
| Q9H2K2 | TNKS2   |
| O95271 | TNKS    |
| P11387 | TOP1    |
| P05089 | ARG1    |
| P30518 | AVPR2   |
| Q96GD4 | AURKB   |
| P21917 | DRD4    |
| P05164 | MPO     |
| P27986 | PIK3R1  |
| P29274 | ADORA2A |
| Q05397 | PTK2    |
| P07451 | CA3     |
| P23280 | CA6     |
| Q16512 | PKN1    |
| Q9ULX7 | CA14    |
| Q16790 | CA9     |
| P51955 | NEK2    |
| P25024 | CXCR1   |
| Q13554 | CAMK2B  |
| Q9UM73 | ALK     |
| Q9HC98 | NEK6    |
| P04054 | PLA2G1B |
| P35218 | CA5A    |
| P30530 | AXL     |
| O60285 | NUAK1   |
| P17516 | AKR1C4  |
| Q8N1Q1 | CA13    |
| P14550 | AKR1A1  |
| Q9HC97 | GPR35   |
| P10636 | MAPT    |
| B2RXH2 | KDM4E   |
| P11388 | TOP2A   |
| P06213 | INSR    |
| Q15746 | MYLK    |
| P27695 | APEX1   |
