# Supplementary material for: Systematic Elucidation of the Potential Mechanism of Erzhi Pill against Drug-Induced Liver Injury via Network Pharmacology Approach
Source: Evid Based Complement Alternat Med. 2020 Jan 6;2020:6219432. doi: 10.1155/2020/6219432 (PMC6970004; doi:10.1155/2020/6219432)
Supplement: https://www.uniprot.org/ Supplementary Materials — Table S1: putative targets for chemicals contained in EZP. Chemname was obtained from TCMSP. Entry, Entry name, and Protein name were obtained from PharmMapper. Entry was converted to Gene name by Uniprot. (https://www.uniprot.org/) Table S2: targets related to DILI. Detailed information of targets related to DILI, there were 267 targets from DrugBank and 357 targets from GeneCards with 42 targets duplicated. Table S3: common targets related to bioactive compounds. Detailed information of 89 common targets related to 23 bioactive compounds. Table S4: the results of GO and KEGG pathway enrichment. 223 BPs, 25 CCs, 65 MFs enriched have a P value less than 0.05, and 86 KEGG pathways were recognized as P < 0.05. [file 6219432.f1.zip]

Archive with 4 entries (4 files):
- 6219432.f1/Supplementary Table S1 (1).pdf
- 6219432.f1/Supplementary Table S2.pdf
- 6219432.f1/Supplementary Table S3.pdf
- 6219432.f1/Supplementary Table S4.pdf
